# Supplementary material for: Estimating Resident&rsquo;s Preference of the Land Use Program surrounding the Forest Park, Taiwan
Source: Preprints.org preprint supplement (doi:10.20944/preprints201611.0119.v1), 2016-11-23
Supplement: Supplementary file 2 [file supplementary]

## Sheet: Database
OBS	TYPE	ASC	FA	BI	WA	LU1	LU2	LU3	EC	FUND	CHOICE	TI	INCOME	LIVE	social	land	farmer	indigen
1	2	0	1	1	-1	1	0	0	-1	1000	1	3	0	0	0	1	0	0
1	2	0	-1	1	-1	0	0	1	-1	500	0	3	0	0	0	1	0	0
1	2	1	-1	-1	-1	-1	-1	-1	-1	0	0	3	0	0	0	1	0	0
1	2	0	-1	-1	-1	-1	-1	-1	1	1500	0	3	0	0	0	1	0	0
1	2	0	-1	-1	-1	-1	-1	-1	1	1000	0	3	0	0	0	1	0	0
1	2	1	-1	-1	-1	-1	-1	-1	-1	0	1	3	0	0	0	1	0	0
1	2	0	-1	1	-1	-1	-1	-1	-1	2000	0	3	0	0	0	1	0	0
1	2	0	-1	1	1	0	1	0	-1	2000	0	3	0	0	0	1	0	0
1	2	1	-1	-1	-1	-1	-1	-1	-1	0	1	3	0	0	0	1	0	0
2	2	0	1	1	-1	1	0	0	-1	1000	1	3	0	0	1	1	1	0
2	2	0	-1	1	-1	0	0	1	-1	500	0	3	0	0	1	1	1	0
2	2	1	-1	-1	-1	-1	-1	-1	-1	0	0	3	0	0	1	1	1	0
2	2	0	-1	-1	-1	-1	-1	-1	1	1500	1	3	0	0	1	1	1	0
2	2	0	-1	-1	-1	-1	-1	-1	1	1000	0	3	0	0	1	1	1	0
2	2	1	-1	-1	-1	-1	-1	-1	-1	0	0	3	0	0	1	1	1	0
2	2	0	-1	1	-1	-1	-1	-1	-1	2000	0	3	0	0	1	1	1	0
2	2	0	-1	1	1	0	1	0	-1	2000	1	3	0	0	1	1	1	0
2	2	1	-1	-1	-1	-1	-1	-1	-1	0	0	3	0	0	1	1	1	0
3	2	0	1	1	-1	1	0	0	-1	1000	1	3	0	1	0	1	1	0
3	2	0	-1	1	-1	0	0	1	-1	500	0	3	0	1	0	1	1	0
3	2	1	-1	-1	-1	-1	-1	-1	-1	0	0	3	0	1	0	1	1	0
3	2	0	-1	-1	-1	-1	-1	-1	1	1500	1	3	0	1	0	1	1	0
3	2	0	-1	-1	-1	-1	-1	-1	1	1000	0	3	0	1	0	1	1	0
3	2	1	-1	-1	-1	-1	-1	-1	-1	0	0	3	0	1	0	1	1	0
3	2	0	-1	1	-1	-1	-1	-1	-1	2000	0	3	0	1	0	1	1	0
3	2	0	-1	1	1	0	1	0	-1	2000	1	3	0	1	0	1	1	0
3	2	1	-1	-1	-1	-1	-1	-1	-1	0	0	3	0	1	0	1	1	0
4	1	0	-1	1	-1	1	0	0	1	1500	0	3	0	0	1	1	1	0
4	1	0	-1	-1	1	-1	-1	-1	-1	1000	1	3	0	0	1	1	1	0
4	1	1	-1	-1	-1	-1	-1	-1	-1	0	0	3	0	0	1	1	1	0
4	1	0	-1	1	-1	0	1	0	1	500	1	3	0	0	1	1	1	0
4	1	0	1	1	1	-1	-1	-1	1	2000	0	3	0	0	1	1	1	0
4	1	1	-1	-1	-1	-1	-1	-1	-1	0	0	3	0	0	1	1	1	0
4	1	0	1	-1	1	-1	-1	-1	1	500	1	3	0	0	1	1	1	0
4	1	0	-1	-1	-1	-1	-1	-1	1	500	0	3	0	0	1	1	1	0
4	1	1	-1	-1	-1	-1	-1	-1	-1	0	0	3	0	0	1	1	1	0
5	1	0	-1	1	-1	1	0	0	1	1500	1	3	0	1	0	1	1	0
5	1	0	-1	-1	1	-1	-1	-1	-1	1000	0	3	0	1	0	1	1	0
5	1	1	-1	-1	-1	-1	-1	-1	-1	0	0	3	0	1	0	1	1	0
5	1	0	-1	1	-1	0	1	0	1	500	0	3	0	1	0	1	1	0
5	1	0	1	1	1	-1	-1	-1	1	2000	1	3	0	1	0	1	1	0
5	1	1	-1	-1	-1	-1	-1	-1	-1	0	0	3	0	1	0	1	1	0
5	1	0	1	-1	1	-1	-1	-1	1	500	1	3	0	1	0	1	1	0
5	1	0	-1	-1	-1	-1	-1	-1	1	500	0	3	0	1	0	1	1	0
5	1	1	-1	-1	-1	-1	-1	-1	-1	0	0	3	0	1	0	1	1	0
6	2	0	1	1	-1	1	0	0	-1	1000	0	3	0	0	1	1	1	0
6	2	0	-1	1	-1	0	0	1	-1	500	0	3	0	0	1	1	1	0
6	2	1	-1	-1	-1	-1	-1	-1	-1	0	1	3	0	0	1	1	1	0
6	2	0	-1	-1	-1	-1	-1	-1	1	1500	0	3	0	0	1	1	1	0
6	2	0	-1	-1	-1	-1	-1	-1	1	1000	0	3	0	0	1	1	1	0
6	2	1	-1	-1	-1	-1	-1	-1	-1	0	1	3	0	0	1	1	1	0
6	2	0	-1	1	-1	-1	-1	-1	-1	2000	0	3	0	0	1	1	1	0
6	2	0	-1	1	1	0	1	0	-1	2000	0	3	0	0	1	1	1	0
6	2	1	-1	-1	-1	-1	-1	-1	-1	0	1	3	0	0	1	1	1	0
7	1	0	-1	1	-1	1	0	0	1	1500	0	3	0	1	0	1	1	0
7	1	0	-1	-1	1	-1	-1	-1	-1	1000	0	3	0	1	0	1	1	0
7	1	1	-1	-1	-1	-1	-1	-1	-1	0	1	3	0	1	0	1	1	0
7	1	0	-1	1	-1	0	1	0	1	500	0	3	0	1	0	1	1	0
7	1	0	1	1	1	-1	-1	-1	1	2000	0	3	0	1	0	1	1	0
7	1	1	-1	-1	-1	-1	-1	-1	-1	0	1	3	0	1	0	1	1	0
7	1	0	1	-1	1	-1	-1	-1	1	500	0	3	0	1	0	1	1	0
7	1	0	-1	-1	-1	-1	-1	-1	1	500	0	3	0	1	0	1	1	0
7	1	1	-1	-1	-1	-1	-1	-1	-1	0	1	3	0	1	0	1	1	0
8	2	0	1	1	-1	1	0	0	-1	1000	1	3	0	0	1	1	1	0
8	2	0	-1	1	-1	0	0	1	-1	500	0	3	0	0	1	1	1	0
8	2	1	-1	-1	-1	-1	-1	-1	-1	0	0	3	0	0	1	1	1	0
8	2	0	-1	-1	-1	-1	-1	-1	1	1500	0	3	0	0	1	1	1	0
8	2	0	-1	-1	-1	-1	-1	-1	1	1000	1	3	0	0	1	1	1	0
8	2	1	-1	-1	-1	-1	-1	-1	-1	0	0	3	0	0	1	1	1	0
8	2	0	-1	1	-1	-1	-1	-1	-1	2000	0	3	0	0	1	1	1	0
8	2	0	-1	1	1	0	1	0	-1	2000	1	3	0	0	1	1	1	0
8	2	1	-1	-1	-1	-1	-1	-1	-1	0	0	3	0	0	1	1	1	0
9	1	0	-1	1	-1	1	0	0	1	1500	0	3	0	0	0	0	1	0
9	1	0	-1	-1	1	-1	-1	-1	-1	1000	0	3	0	0	0	0	1	0
9	1	1	-1	-1	-1	-1	-1	-1	-1	0	1	3	0	0	0	0	1	0
9	1	0	-1	1	-1	0	1	0	1	500	0	3	0	0	0	0	1	0
9	1	0	1	1	1	-1	-1	-1	1	2000	0	3	0	0	0	0	1	0
9	1	1	-1	-1	-1	-1	-1	-1	-1	0	1	3	0	0	0	0	1	0
9	1	0	1	-1	1	-1	-1	-1	1	500	0	3	0	0	0	0	1	0
9	1	0	-1	-1	-1	-1	-1	-1	1	500	0	3	0	0	0	0	1	0
9	1	1	-1	-1	-1	-1	-1	-1	-1	0	1	3	0	0	0	0	1	0
10	1	0	-1	1	-1	1	0	0	1	1500	1	3	1	1	1	1	1	0
10	1	0	-1	-1	1	-1	-1	-1	-1	1000	0	3	1	1	1	1	1	0
10	1	1	-1	-1	-1	-1	-1	-1	-1	0	0	3	1	1	1	1	1	0
10	1	0	-1	1	-1	0	1	0	1	500	0	3	1	1	1	1	1	0
10	1	0	1	1	1	-1	-1	-1	1	2000	1	3	1	1	1	1	1	0
10	1	1	-1	-1	-1	-1	-1	-1	-1	0	0	3	1	1	1	1	1	0
10	1	0	1	-1	1	-1	-1	-1	1	500	0	3	1	1	1	1	1	0
10	1	0	-1	-1	-1	-1	-1	-1	1	500	0	3	1	1	1	1	1	0
10	1	1	-1	-1	-1	-1	-1	-1	-1	0	1	3	1	1	1	1	1	0
11	1	0	-1	1	-1	1	0	0	1	1500	1	3	0	0	1	1	1	0
11	1	0	-1	-1	1	-1	-1	-1	-1	1000	0	3	0	0	1	1	1	0
11	1	1	-1	-1	-1	-1	-1	-1	-1	0	0	3	0	0	1	1	1	0
11	1	0	-1	1	-1	0	1	0	1	500	1	3	0	0	1	1	1	0
11	1	0	1	1	1	-1	-1	-1	1	2000	0	3	0	0	1	1	1	0
11	1	1	-1	-1	-1	-1	-1	-1	-1	0	0	3	0	0	1	1	1	0
11	1	0	1	-1	1	-1	-1	-1	1	500	1	3	0	0	1	1	1	0
11	1	0	-1	-1	-1	-1	-1	-1	1	500	0	3	0	0	1	1	1	0
11	1	1	-1	-1	-1	-1	-1	-1	-1	0	0	3	0	0	1	1	1	0
12	1	0	-1	1	-1	1	0	0	1	1500	0	3	1	0	0	1	1	0
12	1	0	-1	-1	1	-1	-1	-1	-1	1000	1	3	1	0	0	1	1	0
12	1	1	-1	-1	-1	-1	-1	-1	-1	0	0	3	1	0	0	1	1	0
12	1	0	-1	1	-1	0	1	0	1	500	1	3	1	0	0	1	1	0
12	1	0	1	1	1	-1	-1	-1	1	2000	0	3	1	0	0	1	1	0
12	1	1	-1	-1	-1	-1	-1	-1	-1	0	0	3	1	0	0	1	1	0
12	1	0	1	-1	1	-1	-1	-1	1	500	0	3	1	0	0	1	1	0
12	1	0	-1	-1	-1	-1	-1	-1	1	500	1	3	1	0	0	1	1	0
12	1	1	-1	-1	-1	-1	-1	-1	-1	0	0	3	1	0	0	1	1	0
13	1	0	-1	1	-1	1	0	0	1	1500	1	3	1	1	1	1	0	0
13	1	0	-1	-1	1	-1	-1	-1	-1	1000	0	3	1	1	1	1	0	0
13	1	1	-1	-1	-1	-1	-1	-1	-1	0	0	3	1	1	1	1	0	0
13	1	0	-1	1	-1	0	1	0	1	500	0	3	1	1	1	1	0	0
13	1	0	1	1	1	-1	-1	-1	1	2000	1	3	1	1	1	1	0	0
13	1	1	-1	-1	-1	-1	-1	-1	-1	0	0	3	1	1	1	1	0	0
13	1	0	1	-1	1	-1	-1	-1	1	500	1	3	1	1	1	1	0	0
13	1	0	-1	-1	-1	-1	-1	-1	1	500	0	3	1	1	1	1	0	0
13	1	1	-1	-1	-1	-1	-1	-1	-1	0	0	3	1	1	1	1	0	0
14	2	0	1	1	-1	1	0	0	-1	1000	0	3	1	1	0	1	0	0
14	2	0	-1	1	-1	0	0	1	-1	500	1	3	1	1	0	1	0	0
14	2	1	-1	-1	-1	-1	-1	-1	-1	0	0	3	1	1	0	1	0	0
14	2	0	-1	-1	-1	-1	-1	-1	1	1500	0	3	1	1	0	1	0	0
14	2	0	-1	-1	-1	-1	-1	-1	1	1000	1	3	1	1	0	1	0	0
14	2	1	-1	-1	-1	-1	-1	-1	-1	0	0	3	1	1	0	1	0	0
14	2	0	-1	1	-1	-1	-1	-1	-1	2000	1	3	1	1	0	1	0	0
14	2	0	-1	1	1	0	1	0	-1	2000	0	3	1	1	0	1	0	0
14	2	1	-1	-1	-1	-1	-1	-1	-1	0	0	3	1	1	0	1	0	0
15	2	0	1	1	-1	1	0	0	-1	1000	0	3	0	1	0	1	1	0
15	2	0	-1	1	-1	0	0	1	-1	500	0	3	0	1	0	1	1	0
15	2	1	-1	-1	-1	-1	-1	-1	-1	0	1	3	0	1	0	1	1	0
15	2	0	-1	-1	-1	-1	-1	-1	1	1500	0	3	0	1	0	1	1	0
15	2	0	-1	-1	-1	-1	-1	-1	1	1000	0	3	0	1	0	1	1	0
15	2	1	-1	-1	-1	-1	-1	-1	-1	0	1	3	0	1	0	1	1	0
15	2	0	-1	1	-1	-1	-1	-1	-1	2000	0	3	0	1	0	1	1	0
15	2	0	-1	1	1	0	1	0	-1	2000	0	3	0	1	0	1	1	0
15	2	1	-1	-1	-1	-1	-1	-1	-1	0	1	3	0	1	0	1	1	0
16	1	0	-1	1	-1	1	0	0	1	1500	0	3	1	1	0	1	0	0
16	1	0	-1	-1	1	-1	-1	-1	-1	1000	0	3	1	1	0	1	0	0
16	1	1	-1	-1	-1	-1	-1	-1	-1	0	1	3	1	1	0	1	0	0
16	1	0	-1	1	-1	0	1	0	1	500	0	3	1	1	0	1	0	0
16	1	0	1	1	1	-1	-1	-1	1	2000	0	3	1	1	0	1	0	0
16	1	1	-1	-1	-1	-1	-1	-1	-1	0	1	3	1	1	0	1	0	0
16	1	0	1	-1	1	-1	-1	-1	1	500	0	3	1	1	0	1	0	0
16	1	0	-1	-1	-1	-1	-1	-1	1	500	0	3	1	1	0	1	0	0
16	1	1	-1	-1	-1	-1	-1	-1	-1	0	1	3	1	1	0	1	0	0
17	2	0	1	1	-1	1	0	0	-1	1000	0	3	1	0	0	0	1	0
17	2	0	-1	1	-1	0	0	1	-1	500	0	3	1	0	0	0	1	0
17	2	1	-1	-1	-1	-1	-1	-1	-1	0	1	3	1	0	0	0	1	0
17	2	0	-1	-1	-1	-1	-1	-1	1	1500	0	3	1	0	0	0	1	0
17	2	0	-1	-1	-1	-1	-1	-1	1	1000	0	3	1	0	0	0	1	0
17	2	1	-1	-1	-1	-1	-1	-1	-1	0	1	3	1	0	0	0	1	0
17	2	0	-1	1	-1	-1	-1	-1	-1	2000	0	3	1	0	0	0	1	0
17	2	0	-1	1	1	0	1	0	-1	2000	0	3	1	0	0	0	1	0
17	2	1	-1	-1	-1	-1	-1	-1	-1	0	1	3	1	0	0	0	1	0
18	2	0	1	1	-1	1	0	0	-1	1000	0	3	0	0	0	1	1	0
18	2	0	-1	1	-1	0	0	1	-1	500	0	3	0	0	0	1	1	0
18	2	1	-1	-1	-1	-1	-1	-1	-1	0	1	3	0	0	0	1	1	0
18	2	0	-1	-1	-1	-1	-1	-1	1	1500	0	3	0	0	0	1	1	0
18	2	0	-1	-1	-1	-1	-1	-1	1	1000	0	3	0	0	0	1	1	0
18	2	1	-1	-1	-1	-1	-1	-1	-1	0	1	3	0	0	0	1	1	0
18	2	0	-1	1	-1	-1	-1	-1	-1	2000	0	3	0	0	0	1	1	0
18	2	0	-1	1	1	0	1	0	-1	2000	0	3	0	0	0	1	1	0
18	2	1	-1	-1	-1	-1	-1	-1	-1	0	1	3	0	0	0	1	1	0
19	2	0	1	1	-1	1	0	0	-1	1000	0	3	0	0	1	0	1	0
19	2	0	-1	1	-1	0	0	1	-1	500	1	3	0	0	1	0	1	0
19	2	1	-1	-1	-1	-1	-1	-1	-1	0	0	3	0	0	1	0	1	0
19	2	0	-1	-1	-1	-1	-1	-1	1	1500	0	3	0	0	1	0	1	0
19	2	0	-1	-1	-1	-1	-1	-1	1	1000	1	3	0	0	1	0	1	0
19	2	1	-1	-1	-1	-1	-1	-1	-1	0	0	3	0	0	1	0	1	0
19	2	0	-1	1	-1	-1	-1	-1	-1	2000	0	3	0	0	1	0	1	0
19	2	0	-1	1	1	0	1	0	-1	2000	1	3	0	0	1	0	1	0
19	2	1	-1	-1	-1	-1	-1	-1	-1	0	0	3	0	0	1	0	1	0
20	2	0	1	1	-1	1	0	0	-1	1000	0	3	0	1	1	1	0	0
20	2	0	-1	1	-1	0	0	1	-1	500	1	3	0	1	1	1	0	0
20	2	1	-1	-1	-1	-1	-1	-1	-1	0	0	3	0	1	1	1	0	0
20	2	0	-1	-1	-1	-1	-1	-1	1	1500	0	3	0	1	1	1	0	0
20	2	0	-1	-1	-1	-1	-1	-1	1	1000	1	3	0	1	1	1	0	0
20	2	1	-1	-1	-1	-1	-1	-1	-1	0	0	3	0	1	1	1	0	0
20	2	0	-1	1	-1	-1	-1	-1	-1	2000	0	3	0	1	1	1	0	0
20	2	0	-1	1	1	0	1	0	-1	2000	1	3	0	1	1	1	0	0
20	2	1	-1	-1	-1	-1	-1	-1	-1	0	0	3	0	1	1	1	0	0
21	1	0	-1	1	-1	1	0	0	1	1500	0	3	0	1	1	1	1	0
21	1	0	-1	-1	1	-1	-1	-1	-1	1000	1	3	0	1	1	1	1	0
21	1	1	-1	-1	-1	-1	-1	-1	-1	0	0	3	0	1	1	1	1	0
21	1	0	-1	1	-1	0	1	0	1	500	1	3	0	1	1	1	1	0
21	1	0	1	1	1	-1	-1	-1	1	2000	0	3	0	1	1	1	1	0
21	1	1	-1	-1	-1	-1	-1	-1	-1	0	0	3	0	1	1	1	1	0
21	1	0	1	-1	1	-1	-1	-1	1	500	1	3	0	1	1	1	1	0
21	1	0	-1	-1	-1	-1	-1	-1	1	500	0	3	0	1	1	1	1	0
21	1	1	-1	-1	-1	-1	-1	-1	-1	0	0	3	0	1	1	1	1	0
22	1	0	-1	1	-1	1	0	0	1	1500	0	3	0	0	1	0	1	0
22	1	0	-1	-1	1	-1	-1	-1	-1	1000	1	3	0	0	1	0	1	0
22	1	1	-1	-1	-1	-1	-1	-1	-1	0	0	3	0	0	1	0	1	0
22	1	0	-1	1	-1	0	1	0	1	500	1	3	0	0	1	0	1	0
22	1	0	1	1	1	-1	-1	-1	1	2000	0	3	0	0	1	0	1	0
22	1	1	-1	-1	-1	-1	-1	-1	-1	0	0	3	0	0	1	0	1	0
22	1	0	1	-1	1	-1	-1	-1	1	500	1	3	0	0	1	0	1	0
22	1	0	-1	-1	-1	-1	-1	-1	1	500	0	3	0	0	1	0	1	0
22	1	1	-1	-1	-1	-1	-1	-1	-1	0	0	3	0	0	1	0	1	0
23	2	0	1	1	-1	1	0	0	-1	1000	0	3	0	0	1	1	0	0
23	2	0	-1	1	-1	0	0	1	-1	500	0	3	0	0	1	1	0	0
23	2	1	-1	-1	-1	-1	-1	-1	-1	0	1	3	0	0	1	1	0	0
23	2	0	-1	-1	-1	-1	-1	-1	1	1500	0	3	0	0	1	1	0	0
23	2	0	-1	-1	-1	-1	-1	-1	1	1000	0	3	0	0	1	1	0	0
23	2	1	-1	-1	-1	-1	-1	-1	-1	0	1	3	0	0	1	1	0	0
23	2	0	-1	1	-1	-1	-1	-1	-1	2000	0	3	0	0	1	1	0	0
23	2	0	-1	1	1	0	1	0	-1	2000	0	3	0	0	1	1	0	0
23	2	1	-1	-1	-1	-1	-1	-1	-1	0	1	3	0	0	1	1	0	0
24	2	0	1	1	-1	1	0	0	-1	1000	0	3	0	0	1	1	1	0
24	2	0	-1	1	-1	0	0	1	-1	500	0	3	0	0	1	1	1	0
24	2	1	-1	-1	-1	-1	-1	-1	-1	0	1	3	0	0	1	1	1	0
24	2	0	-1	-1	-1	-1	-1	-1	1	1500	0	3	0	0	1	1	1	0
24	2	0	-1	-1	-1	-1	-1	-1	1	1000	0	3	0	0	1	1	1	0
24	2	1	-1	-1	-1	-1	-1	-1	-1	0	1	3	0	0	1	1	1	0
24	2	0	-1	1	-1	-1	-1	-1	-1	2000	0	3	0	0	1	1	1	0
24	2	0	-1	1	1	0	1	0	-1	2000	0	3	0	0	1	1	1	0
24	2	1	-1	-1	-1	-1	-1	-1	-1	0	1	3	0	0	1	1	1	0
25	2	0	1	1	-1	1	0	0	-1	1000	0	3	1	1	0	1	0	0
25	2	0	-1	1	-1	0	0	1	-1	500	0	3	1	1	0	1	0	0
25	2	1	-1	-1	-1	-1	-1	-1	-1	0	1	3	1	1	0	1	0	0
25	2	0	-1	-1	-1	-1	-1	-1	1	1500	0	3	1	1	0	1	0	0
25	2	0	-1	-1	-1	-1	-1	-1	1	1000	0	3	1	1	0	1	0	0
25	2	1	-1	-1	-1	-1	-1	-1	-1	0	1	3	1	1	0	1	0	0
25	2	0	-1	1	-1	-1	-1	-1	-1	2000	0	3	1	1	0	1	0	0
25	2	0	-1	1	1	0	1	0	-1	2000	0	3	1	1	0	1	0	0
25	2	1	-1	-1	-1	-1	-1	-1	-1	0	1	3	1	1	0	1	0	0
26	1	0	-1	1	-1	1	0	0	1	1500	1	3	0	0	1	0	1	0
26	1	0	-1	-1	1	-1	-1	-1	-1	1000	0	3	0	0	1	0	1	0
26	1	1	-1	-1	-1	-1	-1	-1	-1	0	0	3	0	0	1	0	1	0
26	1	0	-1	1	-1	0	1	0	1	500	0	3	0	0	1	0	1	0
26	1	0	1	1	1	-1	-1	-1	1	2000	1	3	0	0	1	0	1	0
26	1	1	-1	-1	-1	-1	-1	-1	-1	0	0	3	0	0	1	0	1	0
26	1	0	1	-1	1	-1	-1	-1	1	500	0	3	0	0	1	0	1	0
26	1	0	-1	-1	-1	-1	-1	-1	1	500	1	3	0	0	1	0	1	0
26	1	1	-1	-1	-1	-1	-1	-1	-1	0	0	3	0	0	1	0	1	0
27	1	0	-1	1	-1	1	0	0	1	1500	0	3	1	0	1	1	0	0
27	1	0	-1	-1	1	-1	-1	-1	-1	1000	1	3	1	0	1	1	0	0
27	1	1	-1	-1	-1	-1	-1	-1	-1	0	0	3	1	0	1	1	0	0
27	1	0	-1	1	-1	0	1	0	1	500	1	3	1	0	1	1	0	0
27	1	0	1	1	1	-1	-1	-1	1	2000	0	3	1	0	1	1	0	0
27	1	1	-1	-1	-1	-1	-1	-1	-1	0	0	3	1	0	1	1	0	0
27	1	0	1	-1	1	-1	-1	-1	1	500	0	3	1	0	1	1	0	0
27	1	0	-1	-1	-1	-1	-1	-1	1	500	1	3	1	0	1	1	0	0
27	1	1	-1	-1	-1	-1	-1	-1	-1	0	0	3	1	0	1	1	0	0
28	1	0	-1	1	-1	1	0	0	1	1500	0	3	0	0	1	1	1	0
28	1	0	-1	-1	1	-1	-1	-1	-1	1000	1	3	0	0	1	1	1	0
28	1	1	-1	-1	-1	-1	-1	-1	-1	0	0	3	0	0	1	1	1	0
28	1	0	-1	1	-1	0	1	0	1	500	1	3	0	0	1	1	1	0
28	1	0	1	1	1	-1	-1	-1	1	2000	0	3	0	0	1	1	1	0
28	1	1	-1	-1	-1	-1	-1	-1	-1	0	0	3	0	0	1	1	1	0
28	1	0	1	-1	1	-1	-1	-1	1	500	1	3	0	0	1	1	1	0
28	1	0	-1	-1	-1	-1	-1	-1	1	500	0	3	0	0	1	1	1	0
28	1	1	-1	-1	-1	-1	-1	-1	-1	0	0	3	0	0	1	1	1	0
29	1	0	-1	1	-1	1	0	0	1	1500	0	3	0	1	0	1	1	0
29	1	0	-1	-1	1	-1	-1	-1	-1	1000	1	3	0	1	0	1	1	0
29	1	1	-1	-1	-1	-1	-1	-1	-1	0	0	3	0	1	0	1	1	0
29	1	0	-1	1	-1	0	1	0	1	500	1	3	0	1	0	1	1	0
29	1	0	1	1	1	-1	-1	-1	1	2000	0	3	0	1	0	1	1	0
29	1	1	-1	-1	-1	-1	-1	-1	-1	0	0	3	0	1	0	1	1	0
29	1	0	1	-1	1	-1	-1	-1	1	500	1	3	0	1	0	1	1	0
29	1	0	-1	-1	-1	-1	-1	-1	1	500	0	3	0	1	0	1	1	0
29	1	1	-1	-1	-1	-1	-1	-1	-1	0	0	3	0	1	0	1	1	0
30	2	0	1	1	-1	1	0	0	-1	1000	1	3	0	0	0	1	1	0
30	2	0	-1	1	-1	0	0	1	-1	500	0	3	0	0	0	1	1	0
30	2	1	-1	-1	-1	-1	-1	-1	-1	0	0	3	0	0	0	1	1	0
30	2	0	-1	-1	-1	-1	-1	-1	1	1500	1	3	0	0	0	1	1	0
30	2	0	-1	-1	-1	-1	-1	-1	1	1000	0	3	0	0	0	1	1	0
30	2	1	-1	-1	-1	-1	-1	-1	-1	0	0	3	0	0	0	1	1	0
30	2	0	-1	1	-1	-1	-1	-1	-1	2000	0	3	0	0	0	1	1	0
30	2	0	-1	1	1	0	1	0	-1	2000	1	3	0	0	0	1	1	0
30	2	1	-1	-1	-1	-1	-1	-1	-1	0	0	3	0	0	0	1	1	0
31	2	0	1	1	-1	1	0	0	-1	1000	1	3	0	0	1	0	1	0
31	2	0	-1	1	-1	0	0	1	-1	500	0	3	0	0	1	0	1	0
31	2	1	-1	-1	-1	-1	-1	-1	-1	0	0	3	0	0	1	0	1	0
31	2	0	-1	-1	-1	-1	-1	-1	1	1500	0	3	0	0	1	0	1	0
31	2	0	-1	-1	-1	-1	-1	-1	1	1000	0	3	0	0	1	0	1	0
31	2	1	-1	-1	-1	-1	-1	-1	-1	0	1	3	0	0	1	0	1	0
31	2	0	-1	1	-1	-1	-1	-1	-1	2000	0	3	0	0	1	0	1	0
31	2	0	-1	1	1	0	1	0	-1	2000	1	3	0	0	1	0	1	0
31	2	1	-1	-1	-1	-1	-1	-1	-1	0	0	3	0	0	1	0	1	0
32	2	0	1	1	-1	1	0	0	-1	1000	0	3	0	0	1	1	1	0
32	2	0	-1	1	-1	0	0	1	-1	500	1	3	0	0	1	1	1	0
32	2	1	-1	-1	-1	-1	-1	-1	-1	0	0	3	0	0	1	1	1	0
32	2	0	-1	-1	-1	-1	-1	-1	1	1500	0	3	0	0	1	1	1	0
32	2	0	-1	-1	-1	-1	-1	-1	1	1000	0	3	0	0	1	1	1	0
32	2	1	-1	-1	-1	-1	-1	-1	-1	0	1	3	0	0	1	1	1	0
32	2	0	-1	1	-1	-1	-1	-1	-1	2000	0	3	0	0	1	1	1	0
32	2	0	-1	1	1	0	1	0	-1	2000	1	3	0	0	1	1	1	0
32	2	1	-1	-1	-1	-1	-1	-1	-1	0	0	3	0	0	1	1	1	0
33	2	0	1	1	-1	1	0	0	-1	1000	1	3	0	0	1	0	1	0
33	2	0	-1	1	-1	0	0	1	-1	500	0	3	0	0	1	0	1	0
33	2	1	-1	-1	-1	-1	-1	-1	-1	0	0	3	0	0	1	0	1	0
33	2	0	-1	-1	-1	-1	-1	-1	1	1500	0	3	0	0	1	0	1	0
33	2	0	-1	-1	-1	-1	-1	-1	1	1000	1	3	0	0	1	0	1	0
33	2	1	-1	-1	-1	-1	-1	-1	-1	0	0	3	0	0	1	0	1	0
33	2	0	-1	1	-1	-1	-1	-1	-1	2000	0	3	0	0	1	0	1	0
33	2	0	-1	1	1	0	1	0	-1	2000	0	3	0	0	1	0	1	0
33	2	1	-1	-1	-1	-1	-1	-1	-1	0	1	3	0	0	1	0	1	0
34	1	0	-1	1	-1	1	0	0	1	1500	0	3	0	0	0	1	1	0
34	1	0	-1	-1	1	-1	-1	-1	-1	1000	0	3	0	0	0	1	1	0
34	1	1	-1	-1	-1	-1	-1	-1	-1	0	1	3	0	0	0	1	1	0
34	1	0	-1	1	-1	0	1	0	1	500	0	3	0	0	0	1	1	0
34	1	0	1	1	1	-1	-1	-1	1	2000	0	3	0	0	0	1	1	0
34	1	1	-1	-1	-1	-1	-1	-1	-1	0	1	3	0	0	0	1	1	0
34	1	0	1	-1	1	-1	-1	-1	1	500	0	3	0	0	0	1	1	0
34	1	0	-1	-1	-1	-1	-1	-1	1	500	0	3	0	0	0	1	1	0
34	1	1	-1	-1	-1	-1	-1	-1	-1	0	1	3	0	0	0	1	1	0
35	1	0	-1	1	-1	1	0	0	1	1500	0	3	0	1	0	0	1	0
35	1	0	-1	-1	1	-1	-1	-1	-1	1000	0	3	0	1	0	0	1	0
35	1	1	-1	-1	-1	-1	-1	-1	-1	0	1	3	0	1	0	0	1	0
35	1	0	-1	1	-1	0	1	0	1	500	0	3	0	1	0	0	1	0
35	1	0	1	1	1	-1	-1	-1	1	2000	0	3	0	1	0	0	1	0
35	1	1	-1	-1	-1	-1	-1	-1	-1	0	1	3	0	1	0	0	1	0
35	1	0	1	-1	1	-1	-1	-1	1	500	0	3	0	1	0	0	1	0
35	1	0	-1	-1	-1	-1	-1	-1	1	500	0	3	0	1	0	0	1	0
35	1	1	-1	-1	-1	-1	-1	-1	-1	0	1	3	0	1	0	0	1	0
36	1	0	-1	1	-1	1	0	0	1	1500	0	3	1	1	1	1	1	0
36	1	0	-1	-1	1	-1	-1	-1	-1	1000	1	3	1	1	1	1	1	0
36	1	1	-1	-1	-1	-1	-1	-1	-1	0	0	3	1	1	1	1	1	0
36	1	0	-1	1	-1	0	1	0	1	500	1	3	1	1	1	1	1	0
36	1	0	1	1	1	-1	-1	-1	1	2000	0	3	1	1	1	1	1	0
36	1	1	-1	-1	-1	-1	-1	-1	-1	0	0	3	1	1	1	1	1	0
36	1	0	1	-1	1	-1	-1	-1	1	500	0	3	1	1	1	1	1	0
36	1	0	-1	-1	-1	-1	-1	-1	1	500	1	3	1	1	1	1	1	0
36	1	1	-1	-1	-1	-1	-1	-1	-1	0	0	3	1	1	1	1	1	0
37	2	0	1	1	-1	1	0	0	-1	1000	1	3	0	0	0	1	1	0
37	2	0	-1	1	-1	0	0	1	-1	500	0	3	0	0	0	1	1	0
37	2	1	-1	-1	-1	-1	-1	-1	-1	0	0	3	0	0	0	1	1	0
37	2	0	-1	-1	-1	-1	-1	-1	1	1500	0	3	0	0	0	1	1	0
37	2	0	-1	-1	-1	-1	-1	-1	1	1000	1	3	0	0	0	1	1	0
37	2	1	-1	-1	-1	-1	-1	-1	-1	0	0	3	0	0	0	1	1	0
37	2	0	-1	1	-1	-1	-1	-1	-1	2000	0	3	0	0	0	1	1	0
37	2	0	-1	1	1	0	1	0	-1	2000	0	3	0	0	0	1	1	0
37	2	1	-1	-1	-1	-1	-1	-1	-1	0	1	3	0	0	0	1	1	0
38	1	0	-1	1	-1	1	0	0	1	1500	1	3	1	0	0	1	1	0
38	1	0	-1	-1	1	-1	-1	-1	-1	1000	0	3	1	0	0	1	1	0
38	1	1	-1	-1	-1	-1	-1	-1	-1	0	0	3	1	0	0	1	1	0
38	1	0	-1	1	-1	0	1	0	1	500	0	3	1	0	0	1	1	0
38	1	0	1	1	1	-1	-1	-1	1	2000	1	3	1	0	0	1	1	0
38	1	1	-1	-1	-1	-1	-1	-1	-1	0	0	3	1	0	0	1	1	0
38	1	0	1	-1	1	-1	-1	-1	1	500	1	3	1	0	0	1	1	0
38	1	0	-1	-1	-1	-1	-1	-1	1	500	0	3	1	0	0	1	1	0
38	1	1	-1	-1	-1	-1	-1	-1	-1	0	0	3	1	0	0	1	1	0
39	1	0	-1	1	-1	1	0	0	1	1500	1	3	0	0	0	1	1	0
39	1	0	-1	-1	1	-1	-1	-1	-1	1000	0	3	0	0	0	1	1	0
39	1	1	-1	-1	-1	-1	-1	-1	-1	0	0	3	0	0	0	1	1	0
39	1	0	-1	1	-1	0	1	0	1	500	0	3	0	0	0	1	1	0
39	1	0	1	1	1	-1	-1	-1	1	2000	0	3	0	0	0	1	1	0
39	1	1	-1	-1	-1	-1	-1	-1	-1	0	1	3	0	0	0	1	1	0
39	1	0	1	-1	1	-1	-1	-1	1	500	0	3	0	0	0	1	1	0
39	1	0	-1	-1	-1	-1	-1	-1	1	500	0	3	0	0	0	1	1	0
39	1	1	-1	-1	-1	-1	-1	-1	-1	0	1	3	0	0	0	1	1	0
40	2	0	1	1	-1	1	0	0	-1	1000	1	3	0	0	0	1	1	0
40	2	0	-1	1	-1	0	0	1	-1	500	0	3	0	0	0	1	1	0
40	2	1	-1	-1	-1	-1	-1	-1	-1	0	0	3	0	0	0	1	1	0
40	2	0	-1	-1	-1	-1	-1	-1	1	1500	0	3	0	0	0	1	1	0
40	2	0	-1	-1	-1	-1	-1	-1	1	1000	1	3	0	0	0	1	1	0
40	2	1	-1	-1	-1	-1	-1	-1	-1	0	0	3	0	0	0	1	1	0
40	2	0	-1	1	-1	-1	-1	-1	-1	2000	0	3	0	0	0	1	1	0
40	2	0	-1	1	1	0	1	0	-1	2000	0	3	0	0	0	1	1	0
40	2	1	-1	-1	-1	-1	-1	-1	-1	0	1	3	0	0	0	1	1	0
41	1	0	-1	1	-1	1	0	0	1	1500	1	3	0	0	1	1	1	0
41	1	0	-1	-1	1	-1	-1	-1	-1	1000	0	3	0	0	1	1	1	0
41	1	1	-1	-1	-1	-1	-1	-1	-1	0	0	3	0	0	1	1	1	0
41	1	0	-1	1	-1	0	1	0	1	500	0	3	0	0	1	1	1	0
41	1	0	1	1	1	-1	-1	-1	1	2000	1	3	0	0	1	1	1	0
41	1	1	-1	-1	-1	-1	-1	-1	-1	0	0	3	0	0	1	1	1	0
41	1	0	1	-1	1	-1	-1	-1	1	500	1	3	0	0	1	1	1	0
41	1	0	-1	-1	-1	-1	-1	-1	1	500	0	3	0	0	1	1	1	0
41	1	1	-1	-1	-1	-1	-1	-1	-1	0	0	3	0	0	1	1	1	0
42	1	0	-1	1	-1	1	0	0	1	1500	0	3	1	0	0	0	1	0
42	1	0	-1	-1	1	-1	-1	-1	-1	1000	1	3	1	0	0	0	1	0
42	1	1	-1	-1	-1	-1	-1	-1	-1	0	0	3	1	0	0	0	1	0
42	1	0	-1	1	-1	0	1	0	1	500	0	3	1	0	0	0	1	0
42	1	0	1	1	1	-1	-1	-1	1	2000	1	3	1	0	0	0	1	0
42	1	1	-1	-1	-1	-1	-1	-1	-1	0	0	3	1	0	0	0	1	0
42	1	0	1	-1	1	-1	-1	-1	1	500	1	3	1	0	0	0	1	0
42	1	0	-1	-1	-1	-1	-1	-1	1	500	0	3	1	0	0	0	1	0
42	1	1	-1	-1	-1	-1	-1	-1	-1	0	0	3	1	0	0	0	1	0
43	1	0	-1	1	-1	1	0	0	1	1500	1	3	1	0	0	0	1	0
43	1	0	-1	-1	1	-1	-1	-1	-1	1000	0	3	1	0	0	0	1	0
43	1	1	-1	-1	-1	-1	-1	-1	-1	0	0	3	1	0	0	0	1	0
43	1	0	-1	1	-1	0	1	0	1	500	0	3	1	0	0	0	1	0
43	1	0	1	1	1	-1	-1	-1	1	2000	1	3	1	0	0	0	1	0
43	1	1	-1	-1	-1	-1	-1	-1	-1	0	0	3	1	0	0	0	1	0
43	1	0	1	-1	1	-1	-1	-1	1	500	1	3	1	0	0	0	1	0
43	1	0	-1	-1	-1	-1	-1	-1	1	500	0	3	1	0	0	0	1	0
43	1	1	-1	-1	-1	-1	-1	-1	-1	0	0	3	1	0	0	0	1	0
44	1	0	-1	1	-1	1	0	0	1	1500	1	3	0	1	0	1	1	0
44	1	0	-1	-1	1	-1	-1	-1	-1	1000	0	3	0	1	0	1	1	0
44	1	1	-1	-1	-1	-1	-1	-1	-1	0	0	3	0	1	0	1	1	0
44	1	0	-1	1	-1	0	1	0	1	500	1	3	0	1	0	1	1	0
44	1	0	1	1	1	-1	-1	-1	1	2000	0	3	0	1	0	1	1	0
44	1	1	-1	-1	-1	-1	-1	-1	-1	0	0	3	0	1	0	1	1	0
44	1	0	1	-1	1	-1	-1	-1	1	500	1	3	0	1	0	1	1	0
44	1	0	-1	-1	-1	-1	-1	-1	1	500	0	3	0	1	0	1	1	0
44	1	1	-1	-1	-1	-1	-1	-1	-1	0	0	3	0	1	0	1	1	0
45	1	0	-1	1	-1	1	0	0	1	1500	0	3	0	0	0	1	1	0
45	1	0	-1	-1	1	-1	-1	-1	-1	1000	0	3	0	0	0	1	1	0
45	1	1	-1	-1	-1	-1	-1	-1	-1	0	1	3	0	0	0	1	1	0
45	1	0	-1	1	-1	0	1	0	1	500	1	3	0	0	0	1	1	0
45	1	0	1	1	1	-1	-1	-1	1	2000	0	3	0	0	0	1	1	0
45	1	1	-1	-1	-1	-1	-1	-1	-1	0	0	3	0	0	0	1	1	0
45	1	0	1	-1	1	-1	-1	-1	1	500	1	3	0	0	0	1	1	0
45	1	0	-1	-1	-1	-1	-1	-1	1	500	0	3	0	0	0	1	1	0
45	1	1	-1	-1	-1	-1	-1	-1	-1	0	0	3	0	0	0	1	1	0
46	1	0	-1	1	-1	1	0	0	1	1500	1	3	1	0	0	1	1	0
46	1	0	-1	-1	1	-1	-1	-1	-1	1000	0	3	1	0	0	1	1	0
46	1	1	-1	-1	-1	-1	-1	-1	-1	0	0	3	1	0	0	1	1	0
46	1	0	-1	1	-1	0	1	0	1	500	0	3	1	0	0	1	1	0
46	1	0	1	1	1	-1	-1	-1	1	2000	1	3	1	0	0	1	1	0
46	1	1	-1	-1	-1	-1	-1	-1	-1	0	0	3	1	0	0	1	1	0
46	1	0	1	-1	1	-1	-1	-1	1	500	1	3	1	0	0	1	1	0
46	1	0	-1	-1	-1	-1	-1	-1	1	500	0	3	1	0	0	1	1	0
46	1	1	-1	-1	-1	-1	-1	-1	-1	0	0	3	1	0	0	1	1	0
47	1	0	-1	1	-1	1	0	0	1	1500	1	3	1	1	1	1	1	0
47	1	0	-1	-1	1	-1	-1	-1	-1	1000	0	3	1	1	1	1	1	0
47	1	1	-1	-1	-1	-1	-1	-1	-1	0	0	3	1	1	1	1	1	0
47	1	0	-1	1	-1	0	1	0	1	500	0	3	1	1	1	1	1	0
47	1	0	1	1	1	-1	-1	-1	1	2000	1	3	1	1	1	1	1	0
47	1	1	-1	-1	-1	-1	-1	-1	-1	0	0	3	1	1	1	1	1	0
47	1	0	1	-1	1	-1	-1	-1	1	500	1	3	1	1	1	1	1	0
47	1	0	-1	-1	-1	-1	-1	-1	1	500	0	3	1	1	1	1	1	0
47	1	1	-1	-1	-1	-1	-1	-1	-1	0	0	3	1	1	1	1	1	0
48	1	0	-1	1	-1	1	0	0	1	1500	0	3	1	0	0	0	1	0
48	1	0	-1	-1	1	-1	-1	-1	-1	1000	1	3	1	0	0	0	1	0
48	1	1	-1	-1	-1	-1	-1	-1	-1	0	0	3	1	0	0	0	1	0
48	1	0	-1	1	-1	0	1	0	1	500	0	3	1	0	0	0	1	0
48	1	0	1	1	1	-1	-1	-1	1	2000	1	3	1	0	0	0	1	0
48	1	1	-1	-1	-1	-1	-1	-1	-1	0	0	3	1	0	0	0	1	0
48	1	0	1	-1	1	-1	-1	-1	1	500	1	3	1	0	0	0	1	0
48	1	0	-1	-1	-1	-1	-1	-1	1	500	0	3	1	0	0	0	1	0
48	1	1	-1	-1	-1	-1	-1	-1	-1	0	0	3	1	0	0	0	1	0
49	1	0	-1	1	-1	1	0	0	1	1500	1	3	0	1	1	1	1	0
49	1	0	-1	-1	1	-1	-1	-1	-1	1000	0	3	0	1	1	1	1	0
49	1	1	-1	-1	-1	-1	-1	-1	-1	0	0	3	0	1	1	1	1	0
49	1	0	-1	1	-1	0	1	0	1	500	1	3	0	1	1	1	1	0
49	1	0	1	1	1	-1	-1	-1	1	2000	0	3	0	1	1	1	1	0
49	1	1	-1	-1	-1	-1	-1	-1	-1	0	0	3	0	1	1	1	1	0
49	1	0	1	-1	1	-1	-1	-1	1	500	1	3	0	1	1	1	1	0
49	1	0	-1	-1	-1	-1	-1	-1	1	500	0	3	0	1	1	1	1	0
49	1	1	-1	-1	-1	-1	-1	-1	-1	0	0	3	0	1	1	1	1	0
50	1	0	-1	1	-1	1	0	0	1	1500	0	3	1	0	0	0	1	0
50	1	0	-1	-1	1	-1	-1	-1	-1	1000	1	3	1	0	0	0	1	0
50	1	1	-1	-1	-1	-1	-1	-1	-1	0	0	3	1	0	0	0	1	0
50	1	0	-1	1	-1	0	1	0	1	500	0	3	1	0	0	0	1	0
50	1	0	1	1	1	-1	-1	-1	1	2000	1	3	1	0	0	0	1	0
50	1	1	-1	-1	-1	-1	-1	-1	-1	0	0	3	1	0	0	0	1	0
50	1	0	1	-1	1	-1	-1	-1	1	500	1	3	1	0	0	0	1	0
50	1	0	-1	-1	-1	-1	-1	-1	1	500	0	3	1	0	0	0	1	0
50	1	1	-1	-1	-1	-1	-1	-1	-1	0	0	3	1	0	0	0	1	0
51	1	0	-1	1	-1	1	0	0	1	1500	1	3	0	1	1	1	1	0
51	1	0	-1	-1	1	-1	-1	-1	-1	1000	0	3	0	1	1	1	1	0
51	1	1	-1	-1	-1	-1	-1	-1	-1	0	0	3	0	1	1	1	1	0
51	1	0	-1	1	-1	0	1	0	1	500	1	3	0	1	1	1	1	0
51	1	0	1	1	1	-1	-1	-1	1	2000	0	3	0	1	1	1	1	0
51	1	1	-1	-1	-1	-1	-1	-1	-1	0	0	3	0	1	1	1	1	0
51	1	0	1	-1	1	-1	-1	-1	1	500	1	3	0	1	1	1	1	0
51	1	0	-1	-1	-1	-1	-1	-1	1	500	0	3	0	1	1	1	1	0
51	1	1	-1	-1	-1	-1	-1	-1	-1	0	0	3	0	1	1	1	1	0
52	1	0	-1	1	-1	1	0	0	1	1500	0	3	1	0	0	0	1	0
52	1	0	-1	-1	1	-1	-1	-1	-1	1000	1	3	1	0	0	0	1	0
52	1	1	-1	-1	-1	-1	-1	-1	-1	0	0	3	1	0	0	0	1	0
52	1	0	-1	1	-1	0	1	0	1	500	0	3	1	0	0	0	1	0
52	1	0	1	1	1	-1	-1	-1	1	2000	1	3	1	0	0	0	1	0
52	1	1	-1	-1	-1	-1	-1	-1	-1	0	0	3	1	0	0	0	1	0
52	1	0	1	-1	1	-1	-1	-1	1	500	0	3	1	0	0	0	1	0
52	1	0	-1	-1	-1	-1	-1	-1	1	500	1	3	1	0	0	0	1	0
52	1	1	-1	-1	-1	-1	-1	-1	-1	0	0	3	1	0	0	0	1	0
53	1	0	-1	1	-1	1	0	0	1	1500	0	3	0	0	1	1	1	0
53	1	0	-1	-1	1	-1	-1	-1	-1	1000	1	3	0	0	1	1	1	0
53	1	1	-1	-1	-1	-1	-1	-1	-1	0	0	3	0	0	1	1	1	0
53	1	0	-1	1	-1	0	1	0	1	500	0	3	0	0	1	1	1	0
53	1	0	1	1	1	-1	-1	-1	1	2000	1	3	0	0	1	1	1	0
53	1	1	-1	-1	-1	-1	-1	-1	-1	0	0	3	0	0	1	1	1	0
53	1	0	1	-1	1	-1	-1	-1	1	500	1	3	0	0	1	1	1	0
53	1	0	-1	-1	-1	-1	-1	-1	1	500	0	3	0	0	1	1	1	0
53	1	1	-1	-1	-1	-1	-1	-1	-1	0	0	3	0	0	1	1	1	0
54	1	0	-1	1	-1	1	0	0	1	1500	0	3	1	0	0	0	1	0
54	1	0	-1	-1	1	-1	-1	-1	-1	1000	1	3	1	0	0	0	1	0
54	1	1	-1	-1	-1	-1	-1	-1	-1	0	0	3	1	0	0	0	1	0
54	1	0	-1	1	-1	0	1	0	1	500	0	3	1	0	0	0	1	0
54	1	0	1	1	1	-1	-1	-1	1	2000	1	3	1	0	0	0	1	0
54	1	1	-1	-1	-1	-1	-1	-1	-1	0	0	3	1	0	0	0	1	0
54	1	0	1	-1	1	-1	-1	-1	1	500	1	3	1	0	0	0	1	0
54	1	0	-1	-1	-1	-1	-1	-1	1	500	0	3	1	0	0	0	1	0
54	1	1	-1	-1	-1	-1	-1	-1	-1	0	0	3	1	0	0	0	1	0
55	1	0	-1	1	-1	1	0	0	1	1500	0	3	1	0	0	1	1	0
55	1	0	-1	-1	1	-1	-1	-1	-1	1000	1	3	1	0	0	1	1	0
55	1	1	-1	-1	-1	-1	-1	-1	-1	0	0	3	1	0	0	1	1	0
55	1	0	-1	1	-1	0	1	0	1	500	0	3	1	0	0	1	1	0
55	1	0	1	1	1	-1	-1	-1	1	2000	1	3	1	0	0	1	1	0
55	1	1	-1	-1	-1	-1	-1	-1	-1	0	0	3	1	0	0	1	1	0
55	1	0	1	-1	1	-1	-1	-1	1	500	1	3	1	0	0	1	1	0
55	1	0	-1	-1	-1	-1	-1	-1	1	500	0	3	1	0	0	1	1	0
55	1	1	-1	-1	-1	-1	-1	-1	-1	0	0	3	1	0	0	1	1	0
56	2	0	1	1	-1	1	0	0	-1	1000	1	3	0	1	0	1	0	0
56	2	0	-1	1	-1	0	0	1	-1	500	0	3	0	1	0	1	0	0
56	2	1	-1	-1	-1	-1	-1	-1	-1	0	0	3	0	1	0	1	0	0
56	2	0	-1	-1	-1	-1	-1	-1	1	1500	0	3	0	1	0	1	0	0
56	2	0	-1	-1	-1	-1	-1	-1	1	1000	1	3	0	1	0	1	0	0
56	2	1	-1	-1	-1	-1	-1	-1	-1	0	0	3	0	1	0	1	0	0
56	2	0	-1	1	-1	-1	-1	-1	-1	2000	0	3	0	1	0	1	0	0
56	2	0	-1	1	1	0	1	0	-1	2000	1	3	0	1	0	1	0	0
56	2	1	-1	-1	-1	-1	-1	-1	-1	0	0	3	0	1	0	1	0	0
57	1	0	-1	1	-1	1	0	0	1	1500	0	3	0	1	0	1	1	0
57	1	0	-1	-1	1	-1	-1	-1	-1	1000	0	3	0	1	0	1	1	0
57	1	1	-1	-1	-1	-1	-1	-1	-1	0	1	3	0	1	0	1	1	0
57	1	0	-1	1	-1	0	1	0	1	500	1	3	0	1	0	1	1	0
57	1	0	1	1	1	-1	-1	-1	1	2000	0	3	0	1	0	1	1	0
57	1	1	-1	-1	-1	-1	-1	-1	-1	0	0	3	0	1	0	1	1	0
57	1	0	1	-1	1	-1	-1	-1	1	500	1	3	0	1	0	1	1	0
57	1	0	-1	-1	-1	-1	-1	-1	1	500	0	3	0	1	0	1	1	0
57	1	1	-1	-1	-1	-1	-1	-1	-1	0	0	3	0	1	0	1	1	0
58	2	0	1	1	-1	1	0	0	-1	1000	1	3	1	0	0	1	1	0
58	2	0	-1	1	-1	0	0	1	-1	500	0	3	1	0	0	1	1	0
58	2	1	-1	-1	-1	-1	-1	-1	-1	0	0	3	1	0	0	1	1	0
58	2	0	-1	-1	-1	-1	-1	-1	1	1500	1	3	1	0	0	1	1	0
58	2	0	-1	-1	-1	-1	-1	-1	1	1000	0	3	1	0	0	1	1	0
58	2	1	-1	-1	-1	-1	-1	-1	-1	0	0	3	1	0	0	1	1	0
58	2	0	-1	1	-1	-1	-1	-1	-1	2000	0	3	1	0	0	1	1	0
58	2	0	-1	1	1	0	1	0	-1	2000	1	3	1	0	0	1	1	0
58	2	1	-1	-1	-1	-1	-1	-1	-1	0	0	3	1	0	0	1	1	0
59	2	0	1	1	-1	1	0	0	-1	1000	0	3	0	0	0	1	1	0
59	2	0	-1	1	-1	0	0	1	-1	500	1	3	0	0	0	1	1	0
59	2	1	-1	-1	-1	-1	-1	-1	-1	0	0	3	0	0	0	1	1	0
59	2	0	-1	-1	-1	-1	-1	-1	1	1500	0	3	0	0	0	1	1	0
59	2	0	-1	-1	-1	-1	-1	-1	1	1000	1	3	0	0	0	1	1	0
59	2	1	-1	-1	-1	-1	-1	-1	-1	0	0	3	0	0	0	1	1	0
59	2	0	-1	1	-1	-1	-1	-1	-1	2000	0	3	0	0	0	1	1	0
59	2	0	-1	1	1	0	1	0	-1	2000	1	3	0	0	0	1	1	0
59	2	1	-1	-1	-1	-1	-1	-1	-1	0	0	3	0	0	0	1	1	0
60	1	0	-1	1	-1	1	0	0	1	1500	1	3	0	0	0	1	1	0
60	1	0	-1	-1	1	-1	-1	-1	-1	1000	0	3	0	0	0	1	1	0
60	1	1	-1	-1	-1	-1	-1	-1	-1	0	0	3	0	0	0	1	1	0
60	1	0	-1	1	-1	0	1	0	1	500	0	3	0	0	0	1	1	0
60	1	0	1	1	1	-1	-1	-1	1	2000	1	3	0	0	0	1	1	0
60	1	1	-1	-1	-1	-1	-1	-1	-1	0	0	3	0	0	0	1	1	0
60	1	0	1	-1	1	-1	-1	-1	1	500	1	3	0	0	0	1	1	0
60	1	0	-1	-1	-1	-1	-1	-1	1	500	0	3	0	0	0	1	1	0
60	1	1	-1	-1	-1	-1	-1	-1	-1	0	0	3	0	0	0	1	1	0
61	2	0	1	1	-1	1	0	0	-1	1000	0	3	0	1	0	1	1	0
61	2	0	-1	1	-1	0	0	1	-1	500	1	3	0	1	0	1	1	0
61	2	1	-1	-1	-1	-1	-1	-1	-1	0	0	3	0	1	0	1	1	0
61	2	0	-1	-1	-1	-1	-1	-1	1	1500	0	3	0	1	0	1	1	0
61	2	0	-1	-1	-1	-1	-1	-1	1	1000	0	3	0	1	0	1	1	0
61	2	1	-1	-1	-1	-1	-1	-1	-1	0	1	3	0	1	0	1	1	0
61	2	0	-1	1	-1	-1	-1	-1	-1	2000	0	3	0	1	0	1	1	0
61	2	0	-1	1	1	0	1	0	-1	2000	0	3	0	1	0	1	1	0
61	2	1	-1	-1	-1	-1	-1	-1	-1	0	1	3	0	1	0	1	1	0
62	2	0	1	1	-1	1	0	0	-1	1000	1	3	1	0	0	1	1	0
62	2	0	-1	1	-1	0	0	1	-1	500	0	3	1	0	0	1	1	0
62	2	1	-1	-1	-1	-1	-1	-1	-1	0	0	3	1	0	0	1	1	0
62	2	0	-1	-1	-1	-1	-1	-1	1	1500	0	3	1	0	0	1	1	0
62	2	0	-1	-1	-1	-1	-1	-1	1	1000	1	3	1	0	0	1	1	0
62	2	1	-1	-1	-1	-1	-1	-1	-1	0	0	3	1	0	0	1	1	0
62	2	0	-1	1	-1	-1	-1	-1	-1	2000	0	3	1	0	0	1	1	0
62	2	0	-1	1	1	0	1	0	-1	2000	0	3	1	0	0	1	1	0
62	2	1	-1	-1	-1	-1	-1	-1	-1	0	1	3	1	0	0	1	1	0
63	2	0	1	1	-1	1	0	0	-1	1000	1	3	0	0	0	1	0	0
63	2	0	-1	1	-1	0	0	1	-1	500	0	3	0	0	0	1	0	0
63	2	1	-1	-1	-1	-1	-1	-1	-1	0	0	3	0	0	0	1	0	0
63	2	0	-1	-1	-1	-1	-1	-1	1	1500	0	3	0	0	0	1	0	0
63	2	0	-1	-1	-1	-1	-1	-1	1	1000	0	3	0	0	0	1	0	0
63	2	1	-1	-1	-1	-1	-1	-1	-1	0	1	3	0	0	0	1	0	0
63	2	0	-1	1	-1	-1	-1	-1	-1	2000	0	3	0	0	0	1	0	0
63	2	0	-1	1	1	0	1	0	-1	2000	1	3	0	0	0	1	0	0
63	2	1	-1	-1	-1	-1	-1	-1	-1	0	0	3	0	0	0	1	0	0
64	1	0	-1	1	-1	1	0	0	1	1500	0	3	0	0	0	0	1	0
64	1	0	-1	-1	1	-1	-1	-1	-1	1000	0	3	0	0	0	0	1	0
64	1	1	-1	-1	-1	-1	-1	-1	-1	0	1	3	0	0	0	0	1	0
64	1	0	-1	1	-1	0	1	0	1	500	0	3	0	0	0	0	1	0
64	1	0	1	1	1	-1	-1	-1	1	2000	0	3	0	0	0	0	1	0
64	1	1	-1	-1	-1	-1	-1	-1	-1	0	1	3	0	0	0	0	1	0
64	1	0	1	-1	1	-1	-1	-1	1	500	0	3	0	0	0	0	1	0
64	1	0	-1	-1	-1	-1	-1	-1	1	500	0	3	0	0	0	0	1	0
64	1	1	-1	-1	-1	-1	-1	-1	-1	0	1	3	0	0	0	0	1	0
65	2	0	1	1	-1	1	0	0	-1	1000	0	3	0	0	0	0	1	0
65	2	0	-1	1	-1	0	0	1	-1	500	1	3	0	0	0	0	1	0
65	2	1	-1	-1	-1	-1	-1	-1	-1	0	0	3	0	0	0	0	1	0
65	2	0	-1	-1	-1	-1	-1	-1	1	1500	0	3	0	0	0	0	1	0
65	2	0	-1	-1	-1	-1	-1	-1	1	1000	0	3	0	0	0	0	1	0
65	2	1	-1	-1	-1	-1	-1	-1	-1	0	1	3	0	0	0	0	1	0
65	2	0	-1	1	-1	-1	-1	-1	-1	2000	0	3	0	0	0	0	1	0
65	2	0	-1	1	1	0	1	0	-1	2000	0	3	0	0	0	0	1	0
65	2	1	-1	-1	-1	-1	-1	-1	-1	0	1	3	0	0	0	0	1	0
66	2	0	1	1	-1	1	0	0	-1	1000	0	3	0	0	0	0	1	0
66	2	0	-1	1	-1	0	0	1	-1	500	1	3	0	0	0	0	1	0
66	2	1	-1	-1	-1	-1	-1	-1	-1	0	0	3	0	0	0	0	1	0
66	2	0	-1	-1	-1	-1	-1	-1	1	1500	0	3	0	0	0	0	1	0
66	2	0	-1	-1	-1	-1	-1	-1	1	1000	0	3	0	0	0	0	1	0
66	2	1	-1	-1	-1	-1	-1	-1	-1	0	1	3	0	0	0	0	1	0
66	2	0	-1	1	-1	-1	-1	-1	-1	2000	0	3	0	0	0	0	1	0
66	2	0	-1	1	1	0	1	0	-1	2000	0	3	0	0	0	0	1	0
66	2	1	-1	-1	-1	-1	-1	-1	-1	0	1	3	0	0	0	0	1	0
67	2	0	1	1	-1	1	0	0	-1	1000	0	3	1	0	0	0	1	0
67	2	0	-1	1	-1	0	0	1	-1	500	1	3	1	0	0	0	1	0
67	2	1	-1	-1	-1	-1	-1	-1	-1	0	0	3	1	0	0	0	1	0
67	2	0	-1	-1	-1	-1	-1	-1	1	1500	0	3	1	0	0	0	1	0
67	2	0	-1	-1	-1	-1	-1	-1	1	1000	0	3	1	0	0	0	1	0
67	2	1	-1	-1	-1	-1	-1	-1	-1	0	1	3	1	0	0	0	1	0
67	2	0	-1	1	-1	-1	-1	-1	-1	2000	0	3	1	0	0	0	1	0
67	2	0	-1	1	1	0	1	0	-1	2000	0	3	1	0	0	0	1	0
67	2	1	-1	-1	-1	-1	-1	-1	-1	0	1	3	1	0	0	0	1	0
68	2	0	1	1	-1	1	0	0	-1	1000	0	3	0	0	0	0	1	0
68	2	0	-1	1	-1	0	0	1	-1	500	0	3	0	0	0	0	1	0
68	2	1	-1	-1	-1	-1	-1	-1	-1	0	1	3	0	0	0	0	1	0
68	2	0	-1	-1	-1	-1	-1	-1	1	1500	0	3	0	0	0	0	1	0
68	2	0	-1	-1	-1	-1	-1	-1	1	1000	0	3	0	0	0	0	1	0
68	2	1	-1	-1	-1	-1	-1	-1	-1	0	1	3	0	0	0	0	1	0
68	2	0	-1	1	-1	-1	-1	-1	-1	2000	0	3	0	0	0	0	1	0
68	2	0	-1	1	1	0	1	0	-1	2000	0	3	0	0	0	0	1	0
68	2	1	-1	-1	-1	-1	-1	-1	-1	0	1	3	0	0	0	0	1	0
69	1	0	-1	1	-1	1	0	0	1	1500	0	3	1	0	0	0	1	0
69	1	0	-1	-1	1	-1	-1	-1	-1	1000	0	3	1	0	0	0	1	0
69	1	1	-1	-1	-1	-1	-1	-1	-1	0	1	3	1	0	0	0	1	0
69	1	0	-1	1	-1	0	1	0	1	500	1	3	1	0	0	0	1	0
69	1	0	1	1	1	-1	-1	-1	1	2000	0	3	1	0	0	0	1	0
69	1	1	-1	-1	-1	-1	-1	-1	-1	0	0	3	1	0	0	0	1	0
69	1	0	1	-1	1	-1	-1	-1	1	500	1	3	1	0	0	0	1	0
69	1	0	-1	-1	-1	-1	-1	-1	1	500	0	3	1	0	0	0	1	0
69	1	1	-1	-1	-1	-1	-1	-1	-1	0	0	3	1	0	0	0	1	0
70	1	0	-1	1	-1	1	0	0	1	1500	0	3	0	0	0	1	1	0
70	1	0	-1	-1	1	-1	-1	-1	-1	1000	0	3	0	0	0	1	1	0
70	1	1	-1	-1	-1	-1	-1	-1	-1	0	1	3	0	0	0	1	1	0
70	1	0	-1	1	-1	0	1	0	1	500	0	3	0	0	0	1	1	0
70	1	0	1	1	1	-1	-1	-1	1	2000	0	3	0	0	0	1	1	0
70	1	1	-1	-1	-1	-1	-1	-1	-1	0	1	3	0	0	0	1	1	0
70	1	0	1	-1	1	-1	-1	-1	1	500	0	3	0	0	0	1	1	0
70	1	0	-1	-1	-1	-1	-1	-1	1	500	0	3	0	0	0	1	1	0
70	1	1	-1	-1	-1	-1	-1	-1	-1	0	1	3	0	0	0	1	1	0
71	1	0	-1	1	-1	1	0	0	1	1500	0	3	0	0	0	1	1	0
71	1	0	-1	-1	1	-1	-1	-1	-1	1000	1	3	0	0	0	1	1	0
71	1	1	-1	-1	-1	-1	-1	-1	-1	0	0	3	0	0	0	1	1	0
71	1	0	-1	1	-1	0	1	0	1	500	0	3	0	0	0	1	1	0
71	1	0	1	1	1	-1	-1	-1	1	2000	1	3	0	0	0	1	1	0
71	1	1	-1	-1	-1	-1	-1	-1	-1	0	0	3	0	0	0	1	1	0
71	1	0	1	-1	1	-1	-1	-1	1	500	1	3	0	0	0	1	1	0
71	1	0	-1	-1	-1	-1	-1	-1	1	500	0	3	0	0	0	1	1	0
71	1	1	-1	-1	-1	-1	-1	-1	-1	0	0	3	0	0	0	1	1	0
72	1	0	-1	1	-1	1	0	0	1	1500	0	3	0	1	0	0	1	0
72	1	0	-1	-1	1	-1	-1	-1	-1	1000	0	3	0	1	0	0	1	0
72	1	1	-1	-1	-1	-1	-1	-1	-1	0	1	3	0	1	0	0	1	0
72	1	0	-1	1	-1	0	1	0	1	500	0	3	0	1	0	0	1	0
72	1	0	1	1	1	-1	-1	-1	1	2000	0	3	0	1	0	0	1	0
72	1	1	-1	-1	-1	-1	-1	-1	-1	0	1	3	0	1	0	0	1	0
72	1	0	1	-1	1	-1	-1	-1	1	500	1	3	0	1	0	0	1	0
72	1	0	-1	-1	-1	-1	-1	-1	1	500	0	3	0	1	0	0	1	0
72	1	1	-1	-1	-1	-1	-1	-1	-1	0	0	3	0	1	0	0	1	0
73	1	0	-1	1	-1	1	0	0	1	1500	0	3	0	0	1	1	1	0
73	1	0	-1	-1	1	-1	-1	-1	-1	1000	1	3	0	0	1	1	1	0
73	1	1	-1	-1	-1	-1	-1	-1	-1	0	0	3	0	0	1	1	1	0
73	1	0	-1	1	-1	0	1	0	1	500	1	3	0	0	1	1	1	0
73	1	0	1	1	1	-1	-1	-1	1	2000	0	3	0	0	1	1	1	0
73	1	1	-1	-1	-1	-1	-1	-1	-1	0	0	3	0	0	1	1	1	0
73	1	0	1	-1	1	-1	-1	-1	1	500	1	3	0	0	1	1	1	0
73	1	0	-1	-1	-1	-1	-1	-1	1	500	0	3	0	0	1	1	1	0
73	1	1	-1	-1	-1	-1	-1	-1	-1	0	0	3	0	0	1	1	1	0
74	2	0	1	1	-1	1	0	0	-1	1000	0	3	0	0	0	0	1	0
74	2	0	-1	1	-1	0	0	1	-1	500	0	3	0	0	0	0	1	0
74	2	1	-1	-1	-1	-1	-1	-1	-1	0	1	3	0	0	0	0	1	0
74	2	0	-1	-1	-1	-1	-1	-1	1	1500	0	3	0	0	0	0	1	0
74	2	0	-1	-1	-1	-1	-1	-1	1	1000	0	3	0	0	0	0	1	0
74	2	1	-1	-1	-1	-1	-1	-1	-1	0	1	3	0	0	0	0	1	0
74	2	0	-1	1	-1	-1	-1	-1	-1	2000	0	3	0	0	0	0	1	0
74	2	0	-1	1	1	0	1	0	-1	2000	0	3	0	0	0	0	1	0
74	2	1	-1	-1	-1	-1	-1	-1	-1	0	1	3	0	0	0	0	1	0
75	1	0	-1	1	-1	1	0	0	1	1500	0	3	0	0	0	0	1	0
75	1	0	-1	-1	1	-1	-1	-1	-1	1000	0	3	0	0	0	0	1	0
75	1	1	-1	-1	-1	-1	-1	-1	-1	0	1	3	0	0	0	0	1	0
75	1	0	-1	1	-1	0	1	0	1	500	0	3	0	0	0	0	1	0
75	1	0	1	1	1	-1	-1	-1	1	2000	0	3	0	0	0	0	1	0
75	1	1	-1	-1	-1	-1	-1	-1	-1	0	1	3	0	0	0	0	1	0
75	1	0	1	-1	1	-1	-1	-1	1	500	0	3	0	0	0	0	1	0
75	1	0	-1	-1	-1	-1	-1	-1	1	500	0	3	0	0	0	0	1	0
75	1	1	-1	-1	-1	-1	-1	-1	-1	0	1	3	0	0	0	0	1	0
76	1	0	-1	1	-1	1	0	0	1	1500	0	3	1	1	0	1	1	0
76	1	0	-1	-1	1	-1	-1	-1	-1	1000	0	3	1	1	0	1	1	0
76	1	1	-1	-1	-1	-1	-1	-1	-1	0	1	3	1	1	0	1	1	0
76	1	0	-1	1	-1	0	1	0	1	500	0	3	1	1	0	1	1	0
76	1	0	1	1	1	-1	-1	-1	1	2000	0	3	1	1	0	1	1	0
76	1	1	-1	-1	-1	-1	-1	-1	-1	0	1	3	1	1	0	1	1	0
76	1	0	1	-1	1	-1	-1	-1	1	500	0	3	1	1	0	1	1	0
76	1	0	-1	-1	-1	-1	-1	-1	1	500	0	3	1	1	0	1	1	0
76	1	1	-1	-1	-1	-1	-1	-1	-1	0	1	3	1	1	0	1	1	0
77	2	0	1	1	-1	1	0	0	-1	1000	0	3	0	1	0	0	1	0
77	2	0	-1	1	-1	0	0	1	-1	500	1	3	0	1	0	0	1	0
77	2	1	-1	-1	-1	-1	-1	-1	-1	0	0	3	0	1	0	0	1	0
77	2	0	-1	-1	-1	-1	-1	-1	1	1500	0	3	0	1	0	0	1	0
77	2	0	-1	-1	-1	-1	-1	-1	1	1000	1	3	0	1	0	0	1	0
77	2	1	-1	-1	-1	-1	-1	-1	-1	0	0	3	0	1	0	0	1	0
77	2	0	-1	1	-1	-1	-1	-1	-1	2000	0	3	0	1	0	0	1	0
77	2	0	-1	1	1	0	1	0	-1	2000	1	3	0	1	0	0	1	0
77	2	1	-1	-1	-1	-1	-1	-1	-1	0	0	3	0	1	0	0	1	0
78	1	0	-1	1	-1	1	0	0	1	1500	0	3	0	0	1	0	1	0
78	1	0	-1	-1	1	-1	-1	-1	-1	1000	0	3	0	0	1	0	1	0
78	1	1	-1	-1	-1	-1	-1	-1	-1	0	1	3	0	0	1	0	1	0
78	1	0	-1	1	-1	0	1	0	1	500	0	3	0	0	1	0	1	0
78	1	0	1	1	1	-1	-1	-1	1	2000	0	3	0	0	1	0	1	0
78	1	1	-1	-1	-1	-1	-1	-1	-1	0	1	3	0	0	1	0	1	0
78	1	0	1	-1	1	-1	-1	-1	1	500	0	3	0	0	1	0	1	0
78	1	0	-1	-1	-1	-1	-1	-1	1	500	0	3	0	0	1	0	1	0
78	1	1	-1	-1	-1	-1	-1	-1	-1	0	1	3	0	0	1	0	1	0
79	1	0	-1	1	-1	1	0	0	1	1500	0	3	0	0	0	1	1	0
79	1	0	-1	-1	1	-1	-1	-1	-1	1000	1	3	0	0	0	1	1	0
79	1	1	-1	-1	-1	-1	-1	-1	-1	0	0	3	0	0	0	1	1	0
79	1	0	-1	1	-1	0	1	0	1	500	1	3	0	0	0	1	1	0
79	1	0	1	1	1	-1	-1	-1	1	2000	0	3	0	0	0	1	1	0
79	1	1	-1	-1	-1	-1	-1	-1	-1	0	0	3	0	0	0	1	1	0
79	1	0	1	-1	1	-1	-1	-1	1	500	0	3	0	0	0	1	1	0
79	1	0	-1	-1	-1	-1	-1	-1	1	500	1	3	0	0	0	1	1	0
79	1	1	-1	-1	-1	-1	-1	-1	-1	0	0	3	0	0	0	1	1	0
80	1	0	-1	1	-1	1	0	0	1	1500	0	3	1	1	1	1	1	0
80	1	0	-1	-1	1	-1	-1	-1	-1	1000	1	3	1	1	1	1	1	0
80	1	1	-1	-1	-1	-1	-1	-1	-1	0	0	3	1	1	1	1	1	0
80	1	0	-1	1	-1	0	1	0	1	500	1	3	1	1	1	1	1	0
80	1	0	1	1	1	-1	-1	-1	1	2000	0	3	1	1	1	1	1	0
80	1	1	-1	-1	-1	-1	-1	-1	-1	0	0	3	1	1	1	1	1	0
80	1	0	1	-1	1	-1	-1	-1	1	500	0	3	1	1	1	1	1	0
80	1	0	-1	-1	-1	-1	-1	-1	1	500	1	3	1	1	1	1	1	0
80	1	1	-1	-1	-1	-1	-1	-1	-1	0	0	3	1	1	1	1	1	0
81	2	0	1	1	-1	1	0	0	-1	1000	0	3	0	0	0	1	1	0
81	2	0	-1	1	-1	0	0	1	-1	500	0	3	0	0	0	1	1	0
81	2	1	-1	-1	-1	-1	-1	-1	-1	0	1	3	0	0	0	1	1	0
81	2	0	-1	-1	-1	-1	-1	-1	1	1500	0	3	0	0	0	1	1	0
81	2	0	-1	-1	-1	-1	-1	-1	1	1000	0	3	0	0	0	1	1	0
81	2	1	-1	-1	-1	-1	-1	-1	-1	0	1	3	0	0	0	1	1	0
81	2	0	-1	1	-1	-1	-1	-1	-1	2000	0	3	0	0	0	1	1	0
81	2	0	-1	1	1	0	1	0	-1	2000	0	3	0	0	0	1	1	0
81	2	1	-1	-1	-1	-1	-1	-1	-1	0	1	3	0	0	0	1	1	0
82	1	0	-1	1	-1	1	0	0	1	1500	0	3	0	0	1	0	1	0
82	1	0	-1	-1	1	-1	-1	-1	-1	1000	1	3	0	0	1	0	1	0
82	1	1	-1	-1	-1	-1	-1	-1	-1	0	0	3	0	0	1	0	1	0
82	1	0	-1	1	-1	0	1	0	1	500	1	3	0	0	1	0	1	0
82	1	0	1	1	1	-1	-1	-1	1	2000	0	3	0	0	1	0	1	0
82	1	1	-1	-1	-1	-1	-1	-1	-1	0	0	3	0	0	1	0	1	0
82	1	0	1	-1	1	-1	-1	-1	1	500	1	3	0	0	1	0	1	0
82	1	0	-1	-1	-1	-1	-1	-1	1	500	0	3	0	0	1	0	1	0
82	1	1	-1	-1	-1	-1	-1	-1	-1	0	0	3	0	0	1	0	1	0
83	1	0	-1	1	-1	1	0	0	1	1500	0	3	1	0	1	0	1	0
83	1	0	-1	-1	1	-1	-1	-1	-1	1000	0	3	1	0	1	0	1	0
83	1	1	-1	-1	-1	-1	-1	-1	-1	0	1	3	1	0	1	0	1	0
83	1	0	-1	1	-1	0	1	0	1	500	0	3	1	0	1	0	1	0
83	1	0	1	1	1	-1	-1	-1	1	2000	0	3	1	0	1	0	1	0
83	1	1	-1	-1	-1	-1	-1	-1	-1	0	1	3	1	0	1	0	1	0
83	1	0	1	-1	1	-1	-1	-1	1	500	0	3	1	0	1	0	1	0
83	1	0	-1	-1	-1	-1	-1	-1	1	500	0	3	1	0	1	0	1	0
83	1	1	-1	-1	-1	-1	-1	-1	-1	0	1	3	1	0	1	0	1	0
84	2	0	1	1	-1	1	0	0	-1	1000	0	3	0	0	1	1	0	0
84	2	0	-1	1	-1	0	0	1	-1	500	0	3	0	0	1	1	0	0
84	2	1	-1	-1	-1	-1	-1	-1	-1	0	1	3	0	0	1	1	0	0
84	2	0	-1	-1	-1	-1	-1	-1	1	1500	0	3	0	0	1	1	0	0
84	2	0	-1	-1	-1	-1	-1	-1	1	1000	0	3	0	0	1	1	0	0
84	2	1	-1	-1	-1	-1	-1	-1	-1	0	1	3	0	0	1	1	0	0
84	2	0	-1	1	-1	-1	-1	-1	-1	2000	0	3	0	0	1	1	0	0
84	2	0	-1	1	1	0	1	0	-1	2000	0	3	0	0	1	1	0	0
84	2	1	-1	-1	-1	-1	-1	-1	-1	0	1	3	0	0	1	1	0	0
85	2	0	1	1	-1	1	0	0	-1	1000	1	3	1	0	0	0	0	1
85	2	0	-1	1	-1	0	0	1	-1	500	0	3	1	0	0	0	0	1
85	2	1	-1	-1	-1	-1	-1	-1	-1	0	0	3	1	0	0	0	0	1
85	2	0	-1	-1	-1	-1	-1	-1	1	1500	0	3	1	0	0	0	0	1
85	2	0	-1	-1	-1	-1	-1	-1	1	1000	1	3	1	0	0	0	0	1
85	2	1	-1	-1	-1	-1	-1	-1	-1	0	0	3	1	0	0	0	0	1
85	2	0	-1	1	-1	-1	-1	-1	-1	2000	0	3	1	0	0	0	0	1
85	2	0	-1	1	1	0	1	0	-1	2000	1	3	1	0	0	0	0	1
85	2	1	-1	-1	-1	-1	-1	-1	-1	0	0	3	1	0	0	0	0	1
86	2	0	1	1	-1	1	0	0	-1	1000	0	3	0	1	1	0	1	1
86	2	0	-1	1	-1	0	0	1	-1	500	0	3	0	1	1	0	1	1
86	2	1	-1	-1	-1	-1	-1	-1	-1	0	1	3	0	1	1	0	1	1
86	2	0	-1	-1	-1	-1	-1	-1	1	1500	0	3	0	1	1	0	1	1
86	2	0	-1	-1	-1	-1	-1	-1	1	1000	0	3	0	1	1	0	1	1
86	2	1	-1	-1	-1	-1	-1	-1	-1	0	1	3	0	1	1	0	1	1
86	2	0	-1	1	-1	-1	-1	-1	-1	2000	0	3	0	1	1	0	1	1
86	2	0	-1	1	1	0	1	0	-1	2000	0	3	0	1	1	0	1	1
86	2	1	-1	-1	-1	-1	-1	-1	-1	0	1	3	0	1	1	0	1	1
87	2	0	1	1	-1	1	0	0	-1	1000	0	3	0	0	0	1	0	1
87	2	0	-1	1	-1	0	0	1	-1	500	0	3	0	0	0	1	0	1
87	2	1	-1	-1	-1	-1	-1	-1	-1	0	1	3	0	0	0	1	0	1
87	2	0	-1	-1	-1	-1	-1	-1	1	1500	0	3	0	0	0	1	0	1
87	2	0	-1	-1	-1	-1	-1	-1	1	1000	0	3	0	0	0	1	0	1
87	2	1	-1	-1	-1	-1	-1	-1	-1	0	1	3	0	0	0	1	0	1
87	2	0	-1	1	-1	-1	-1	-1	-1	2000	0	3	0	0	0	1	0	1
87	2	0	-1	1	1	0	1	0	-1	2000	0	3	0	0	0	1	0	1
87	2	1	-1	-1	-1	-1	-1	-1	-1	0	1	3	0	0	0	1	0	1
88	2	0	1	1	-1	1	0	0	-1	1000	0	3	0	0	1	0	1	1
88	2	0	-1	1	-1	0	0	1	-1	500	1	3	0	0	1	0	1	1
88	2	1	-1	-1	-1	-1	-1	-1	-1	0	0	3	0	0	1	0	1	1
88	2	0	-1	-1	-1	-1	-1	-1	1	1500	0	3	0	0	1	0	1	1
88	2	0	-1	-1	-1	-1	-1	-1	1	1000	1	3	0	0	1	0	1	1
88	2	1	-1	-1	-1	-1	-1	-1	-1	0	0	3	0	0	1	0	1	1
88	2	0	-1	1	-1	-1	-1	-1	-1	2000	0	3	0	0	1	0	1	1
88	2	0	-1	1	1	0	1	0	-1	2000	0	3	0	0	1	0	1	1
88	2	1	-1	-1	-1	-1	-1	-1	-1	0	1	3	0	0	1	0	1	1
89	1	0	-1	1	-1	1	0	0	1	1500	0	3	0	0	0	1	0	1
89	1	0	-1	-1	1	-1	-1	-1	-1	1000	1	3	0	0	0	1	0	1
89	1	1	-1	-1	-1	-1	-1	-1	-1	0	0	3	0	0	0	1	0	1
89	1	0	-1	1	-1	0	1	0	1	500	1	3	0	0	0	1	0	1
89	1	0	1	1	1	-1	-1	-1	1	2000	0	3	0	0	0	1	0	1
89	1	1	-1	-1	-1	-1	-1	-1	-1	0	0	3	0	0	0	1	0	1
89	1	0	1	-1	1	-1	-1	-1	1	500	1	3	0	0	0	1	0	1
89	1	0	-1	-1	-1	-1	-1	-1	1	500	0	3	0	0	0	1	0	1
89	1	1	-1	-1	-1	-1	-1	-1	-1	0	0	3	0	0	0	1	0	1
90	1	0	-1	1	-1	1	0	0	1	1500	0	3	1	0	0	1	1	1
90	1	0	-1	-1	1	-1	-1	-1	-1	1000	1	3	1	0	0	1	1	1
90	1	1	-1	-1	-1	-1	-1	-1	-1	0	0	3	1	0	0	1	1	1
90	1	0	-1	1	-1	0	1	0	1	500	0	3	1	0	0	1	1	1
90	1	0	1	1	1	-1	-1	-1	1	2000	1	3	1	0	0	1	1	1
90	1	1	-1	-1	-1	-1	-1	-1	-1	0	0	3	1	0	0	1	1	1
90	1	0	1	-1	1	-1	-1	-1	1	500	1	3	1	0	0	1	1	1
90	1	0	-1	-1	-1	-1	-1	-1	1	500	0	3	1	0	0	1	1	1
90	1	1	-1	-1	-1	-1	-1	-1	-1	0	0	3	1	0	0	1	1	1
91	1	0	-1	1	-1	1	0	0	1	1500	0	3	1	1	1	0	1	1
91	1	0	-1	-1	1	-1	-1	-1	-1	1000	0	3	1	1	1	0	1	1
91	1	1	-1	-1	-1	-1	-1	-1	-1	0	1	3	1	1	1	0	1	1
91	1	0	-1	1	-1	0	1	0	1	500	0	3	1	1	1	0	1	1
91	1	0	1	1	1	-1	-1	-1	1	2000	0	3	1	1	1	0	1	1
91	1	1	-1	-1	-1	-1	-1	-1	-1	0	1	3	1	1	1	0	1	1
91	1	0	1	-1	1	-1	-1	-1	1	500	0	3	1	1	1	0	1	1
91	1	0	-1	-1	-1	-1	-1	-1	1	500	0	3	1	1	1	0	1	1
91	1	1	-1	-1	-1	-1	-1	-1	-1	0	1	3	1	1	1	0	1	1
92	1	0	-1	1	-1	1	0	0	1	1500	0	3	1	1	1	1	0	1
92	1	0	-1	-1	1	-1	-1	-1	-1	1000	0	3	1	1	1	1	0	1
92	1	1	-1	-1	-1	-1	-1	-1	-1	0	1	3	1	1	1	1	0	1
92	1	0	-1	1	-1	0	1	0	1	500	0	3	1	1	1	1	0	1
92	1	0	1	1	1	-1	-1	-1	1	2000	0	3	1	1	1	1	0	1
92	1	1	-1	-1	-1	-1	-1	-1	-1	0	1	3	1	1	1	1	0	1
92	1	0	1	-1	1	-1	-1	-1	1	500	0	3	1	1	1	1	0	1
92	1	0	-1	-1	-1	-1	-1	-1	1	500	0	3	1	1	1	1	0	1
92	1	1	-1	-1	-1	-1	-1	-1	-1	0	1	3	1	1	1	1	0	1
93	1	0	-1	1	-1	1	0	0	1	1500	0	3	1	1	1	1	0	1
93	1	0	-1	-1	1	-1	-1	-1	-1	1000	1	3	1	1	1	1	0	1
93	1	1	-1	-1	-1	-1	-1	-1	-1	0	0	3	1	1	1	1	0	1
93	1	0	-1	1	-1	0	1	0	1	500	1	3	1	1	1	1	0	1
93	1	0	1	1	1	-1	-1	-1	1	2000	0	3	1	1	1	1	0	1
93	1	1	-1	-1	-1	-1	-1	-1	-1	0	0	3	1	1	1	1	0	1
93	1	0	1	-1	1	-1	-1	-1	1	500	0	3	1	1	1	1	0	1
93	1	0	-1	-1	-1	-1	-1	-1	1	500	1	3	1	1	1	1	0	1
93	1	1	-1	-1	-1	-1	-1	-1	-1	0	0	3	1	1	1	1	0	1
94	2	0	1	1	-1	1	0	0	-1	1000	1	3	1	0	1	1	0	1
94	2	0	-1	1	-1	0	0	1	-1	500	0	3	1	0	1	1	0	1
94	2	1	-1	-1	-1	-1	-1	-1	-1	0	0	3	1	0	1	1	0	1
94	2	0	-1	-1	-1	-1	-1	-1	1	1500	1	3	1	0	1	1	0	1
94	2	0	-1	-1	-1	-1	-1	-1	1	1000	0	3	1	0	1	1	0	1
94	2	1	-1	-1	-1	-1	-1	-1	-1	0	0	3	1	0	1	1	0	1
94	2	0	-1	1	-1	-1	-1	-1	-1	2000	0	3	1	0	1	1	0	1
94	2	0	-1	1	1	0	1	0	-1	2000	1	3	1	0	1	1	0	1
94	2	1	-1	-1	-1	-1	-1	-1	-1	0	0	3	1	0	1	1	0	1
95	2	0	1	1	-1	1	0	0	-1	1000	0	3	0	0	1	1	0	1
95	2	0	-1	1	-1	0	0	1	-1	500	1	3	0	0	1	1	0	1
95	2	1	-1	-1	-1	-1	-1	-1	-1	0	0	3	0	0	1	1	0	1
95	2	0	-1	-1	-1	-1	-1	-1	1	1500	0	3	0	0	1	1	0	1
95	2	0	-1	-1	-1	-1	-1	-1	1	1000	1	3	0	0	1	1	0	1
95	2	1	-1	-1	-1	-1	-1	-1	-1	0	0	3	0	0	1	1	0	1
95	2	0	-1	1	-1	-1	-1	-1	-1	2000	1	3	0	0	1	1	0	1
95	2	0	-1	1	1	0	1	0	-1	2000	0	3	0	0	1	1	0	1
95	2	1	-1	-1	-1	-1	-1	-1	-1	0	0	3	0	0	1	1	0	1
96	2	0	1	1	-1	1	0	0	-1	1000	0	3	1	1	1	0	1	1
96	2	0	-1	1	-1	0	0	1	-1	500	1	3	1	1	1	0	1	1
96	2	1	-1	-1	-1	-1	-1	-1	-1	0	0	3	1	1	1	0	1	1
96	2	0	-1	-1	-1	-1	-1	-1	1	1500	0	3	1	1	1	0	1	1
96	2	0	-1	-1	-1	-1	-1	-1	1	1000	1	3	1	1	1	0	1	1
96	2	1	-1	-1	-1	-1	-1	-1	-1	0	0	3	1	1	1	0	1	1
96	2	0	-1	1	-1	-1	-1	-1	-1	2000	0	3	1	1	1	0	1	1
96	2	0	-1	1	1	0	1	0	-1	2000	1	3	1	1	1	0	1	1
96	2	1	-1	-1	-1	-1	-1	-1	-1	0	0	3	1	1	1	0	1	1
97	1	0	-1	1	-1	1	0	0	1	1500	0	3	0	0	0	1	0	1
97	1	0	-1	-1	1	-1	-1	-1	-1	1000	1	3	0	0	0	1	0	1
97	1	1	-1	-1	-1	-1	-1	-1	-1	0	0	3	0	0	0	1	0	1
97	1	0	-1	1	-1	0	1	0	1	500	0	3	0	0	0	1	0	1
97	1	0	1	1	1	-1	-1	-1	1	2000	1	3	0	0	0	1	0	1
97	1	1	-1	-1	-1	-1	-1	-1	-1	0	0	3	0	0	0	1	0	1
97	1	0	1	-1	1	-1	-1	-1	1	500	1	3	0	0	0	1	0	1
97	1	0	-1	-1	-1	-1	-1	-1	1	500	0	3	0	0	0	1	0	1
97	1	1	-1	-1	-1	-1	-1	-1	-1	0	0	3	0	0	0	1	0	1
98	1	0	-1	1	-1	1	0	0	1	1500	0	3	1	0	1	1	1	1
98	1	0	-1	-1	1	-1	-1	-1	-1	1000	0	3	1	0	1	1	1	1
98	1	1	-1	-1	-1	-1	-1	-1	-1	0	1	3	1	0	1	1	1	1
98	1	0	-1	1	-1	0	1	0	1	500	1	3	1	0	1	1	1	1
98	1	0	1	1	1	-1	-1	-1	1	2000	0	3	1	0	1	1	1	1
98	1	1	-1	-1	-1	-1	-1	-1	-1	0	0	3	1	0	1	1	1	1
98	1	0	1	-1	1	-1	-1	-1	1	500	0	3	1	0	1	1	1	1
98	1	0	-1	-1	-1	-1	-1	-1	1	500	0	3	1	0	1	1	1	1
98	1	1	-1	-1	-1	-1	-1	-1	-1	0	1	3	1	0	1	1	1	1
99	1	0	-1	1	-1	1	0	0	1	1500	0	3	0	1	0	1	1	1
99	1	0	-1	-1	1	-1	-1	-1	-1	1000	0	3	0	1	0	1	1	1
99	1	1	-1	-1	-1	-1	-1	-1	-1	0	1	3	0	1	0	1	1	1
99	1	0	-1	1	-1	0	1	0	1	500	0	3	0	1	0	1	1	1
99	1	0	1	1	1	-1	-1	-1	1	2000	0	3	0	1	0	1	1	1
99	1	1	-1	-1	-1	-1	-1	-1	-1	0	1	3	0	1	0	1	1	1
99	1	0	1	-1	1	-1	-1	-1	1	500	0	3	0	1	0	1	1	1
99	1	0	-1	-1	-1	-1	-1	-1	1	500	0	3	0	1	0	1	1	1
99	1	1	-1	-1	-1	-1	-1	-1	-1	0	1	3	0	1	0	1	1	1
100	1	0	-1	1	-1	1	0	0	1	1500	0	3	0	0	0	0	1	1
100	1	0	-1	-1	1	-1	-1	-1	-1	1000	0	3	0	0	0	0	1	1
100	1	1	-1	-1	-1	-1	-1	-1	-1	0	1	3	0	0	0	0	1	1
100	1	0	-1	1	-1	0	1	0	1	500	0	3	0	0	0	0	1	1
100	1	0	1	1	1	-1	-1	-1	1	2000	0	3	0	0	0	0	1	1
100	1	1	-1	-1	-1	-1	-1	-1	-1	0	1	3	0	0	0	0	1	1
100	1	0	1	-1	1	-1	-1	-1	1	500	0	3	0	0	0	0	1	1
100	1	0	-1	-1	-1	-1	-1	-1	1	500	0	3	0	0	0	0	1	1
100	1	1	-1	-1	-1	-1	-1	-1	-1	0	1	3	0	0	0	0	1	1
101	2	0	1	1	-1	1	0	0	-1	1000	1	3	1	0	0	1	1	1
101	2	0	-1	1	-1	0	0	1	-1	500	0	3	1	0	0	1	1	1
101	2	1	-1	-1	-1	-1	-1	-1	-1	0	0	3	1	0	0	1	1	1
101	2	0	-1	-1	-1	-1	-1	-1	1	1500	1	3	1	0	0	1	1	1
101	2	0	-1	-1	-1	-1	-1	-1	1	1000	0	3	1	0	0	1	1	1
101	2	1	-1	-1	-1	-1	-1	-1	-1	0	0	3	1	0	0	1	1	1
101	2	0	-1	1	-1	-1	-1	-1	-1	2000	0	3	1	0	0	1	1	1
101	2	0	-1	1	1	0	1	0	-1	2000	1	3	1	0	0	1	1	1
101	2	1	-1	-1	-1	-1	-1	-1	-1	0	0	3	1	0	0	1	1	1
102	2	0	1	1	-1	1	0	0	-1	1000	1	3	1	0	0	1	1	1
102	2	0	-1	1	-1	0	0	1	-1	500	0	3	1	0	0	1	1	1
102	2	1	-1	-1	-1	-1	-1	-1	-1	0	0	3	1	0	0	1	1	1
102	2	0	-1	-1	-1	-1	-1	-1	1	1500	1	3	1	0	0	1	1	1
102	2	0	-1	-1	-1	-1	-1	-1	1	1000	0	3	1	0	0	1	1	1
102	2	1	-1	-1	-1	-1	-1	-1	-1	0	0	3	1	0	0	1	1	1
102	2	0	-1	1	-1	-1	-1	-1	-1	2000	0	3	1	0	0	1	1	1
102	2	0	-1	1	1	0	1	0	-1	2000	0	3	1	0	0	1	1	1
102	2	1	-1	-1	-1	-1	-1	-1	-1	0	1	3	1	0	0	1	1	1
103	2	0	1	1	-1	1	0	0	-1	1000	0	3	0	1	0	1	0	1
103	2	0	-1	1	-1	0	0	1	-1	500	0	3	0	1	0	1	0	1
103	2	1	-1	-1	-1	-1	-1	-1	-1	0	1	3	0	1	0	1	0	1
103	2	0	-1	-1	-1	-1	-1	-1	1	1500	0	3	0	1	0	1	0	1
103	2	0	-1	-1	-1	-1	-1	-1	1	1000	0	3	0	1	0	1	0	1
103	2	1	-1	-1	-1	-1	-1	-1	-1	0	1	3	0	1	0	1	0	1
103	2	0	-1	1	-1	-1	-1	-1	-1	2000	0	3	0	1	0	1	0	1
103	2	0	-1	1	1	0	1	0	-1	2000	0	3	0	1	0	1	0	1
103	2	1	-1	-1	-1	-1	-1	-1	-1	0	1	3	0	1	0	1	0	1
104	2	0	1	1	-1	1	0	0	-1	1000	0	3	0	1	0	1	0	1
104	2	0	-1	1	-1	0	0	1	-1	500	0	3	0	1	0	1	0	1
104	2	1	-1	-1	-1	-1	-1	-1	-1	0	1	3	0	1	0	1	0	1
104	2	0	-1	-1	-1	-1	-1	-1	1	1500	1	3	0	1	0	1	0	1
104	2	0	-1	-1	-1	-1	-1	-1	1	1000	0	3	0	1	0	1	0	1
104	2	1	-1	-1	-1	-1	-1	-1	-1	0	0	3	0	1	0	1	0	1
104	2	0	-1	1	-1	-1	-1	-1	-1	2000	0	3	0	1	0	1	0	1
104	2	0	-1	1	1	0	1	0	-1	2000	0	3	0	1	0	1	0	1
104	2	1	-1	-1	-1	-1	-1	-1	-1	0	1	3	0	1	0	1	0	1
105	2	0	1	1	-1	1	0	0	-1	1000	0	3	1	0	0	1	1	1
105	2	0	-1	1	-1	0	0	1	-1	500	0	3	1	0	0	1	1	1
105	2	1	-1	-1	-1	-1	-1	-1	-1	0	1	3	1	0	0	1	1	1
105	2	0	-1	-1	-1	-1	-1	-1	1	1500	1	3	1	0	0	1	1	1
105	2	0	-1	-1	-1	-1	-1	-1	1	1000	0	3	1	0	0	1	1	1
105	2	1	-1	-1	-1	-1	-1	-1	-1	0	0	3	1	0	0	1	1	1
105	2	0	-1	1	-1	-1	-1	-1	-1	2000	0	3	1	0	0	1	1	1
105	2	0	-1	1	1	0	1	0	-1	2000	1	3	1	0	0	1	1	1
105	2	1	-1	-1	-1	-1	-1	-1	-1	0	0	3	1	0	0	1	1	1
106	2	0	1	1	-1	1	0	0	-1	1000	0	3	0	1	0	1	1	1
106	2	0	-1	1	-1	0	0	1	-1	500	0	3	0	1	0	1	1	1
106	2	1	-1	-1	-1	-1	-1	-1	-1	0	1	3	0	1	0	1	1	1
106	2	0	-1	-1	-1	-1	-1	-1	1	1500	0	3	0	1	0	1	1	1
106	2	0	-1	-1	-1	-1	-1	-1	1	1000	0	3	0	1	0	1	1	1
106	2	1	-1	-1	-1	-1	-1	-1	-1	0	1	3	0	1	0	1	1	1
106	2	0	-1	1	-1	-1	-1	-1	-1	2000	0	3	0	1	0	1	1	1
106	2	0	-1	1	1	0	1	0	-1	2000	0	3	0	1	0	1	1	1
106	2	1	-1	-1	-1	-1	-1	-1	-1	0	1	3	0	1	0	1	1	1
107	2	0	1	1	-1	1	0	0	-1	1000	0	3	1	0	0	1	1	1
107	2	0	-1	1	-1	0	0	1	-1	500	0	3	1	0	0	1	1	1
107	2	1	-1	-1	-1	-1	-1	-1	-1	0	1	3	1	0	0	1	1	1
107	2	0	-1	-1	-1	-1	-1	-1	1	1500	0	3	1	0	0	1	1	1
107	2	0	-1	-1	-1	-1	-1	-1	1	1000	0	3	1	0	0	1	1	1
107	2	1	-1	-1	-1	-1	-1	-1	-1	0	1	3	1	0	0	1	1	1
107	2	0	-1	1	-1	-1	-1	-1	-1	2000	0	3	1	0	0	1	1	1
107	2	0	-1	1	1	0	1	0	-1	2000	0	3	1	0	0	1	1	1
107	2	1	-1	-1	-1	-1	-1	-1	-1	0	1	3	1	0	0	1	1	1
108	2	0	1	1	-1	1	0	0	-1	1000	0	3	1	0	0	1	1	1
108	2	0	-1	1	-1	0	0	1	-1	500	0	3	1	0	0	1	1	1
108	2	1	-1	-1	-1	-1	-1	-1	-1	0	1	3	1	0	0	1	1	1
108	2	0	-1	-1	-1	-1	-1	-1	1	1500	0	3	1	0	0	1	1	1
108	2	0	-1	-1	-1	-1	-1	-1	1	1000	0	3	1	0	0	1	1	1
108	2	1	-1	-1	-1	-1	-1	-1	-1	0	1	3	1	0	0	1	1	1
108	2	0	-1	1	-1	-1	-1	-1	-1	2000	0	3	1	0	0	1	1	1
108	2	0	-1	1	1	0	1	0	-1	2000	0	3	1	0	0	1	1	1
108	2	1	-1	-1	-1	-1	-1	-1	-1	0	1	3	1	0	0	1	1	1
109	2	0	1	1	-1	1	0	0	-1	1000	0	3	0	1	0	1	1	1
109	2	0	-1	1	-1	0	0	1	-1	500	0	3	0	1	0	1	1	1
109	2	1	-1	-1	-1	-1	-1	-1	-1	0	1	3	0	1	0	1	1	1
109	2	0	-1	-1	-1	-1	-1	-1	1	1500	0	3	0	1	0	1	1	1
109	2	0	-1	-1	-1	-1	-1	-1	1	1000	0	3	0	1	0	1	1	1
109	2	1	-1	-1	-1	-1	-1	-1	-1	0	1	3	0	1	0	1	1	1
109	2	0	-1	1	-1	-1	-1	-1	-1	2000	0	3	0	1	0	1	1	1
109	2	0	-1	1	1	0	1	0	-1	2000	0	3	0	1	0	1	1	1
109	2	1	-1	-1	-1	-1	-1	-1	-1	0	1	3	0	1	0	1	1	1
110	2	0	1	1	-1	1	0	0	-1	1000	0	3	0	0	0	1	1	1
110	2	0	-1	1	-1	0	0	1	-1	500	0	3	0	0	0	1	1	1
110	2	1	-1	-1	-1	-1	-1	-1	-1	0	1	3	0	0	0	1	1	1
110	2	0	-1	-1	-1	-1	-1	-1	1	1500	0	3	0	0	0	1	1	1
110	2	0	-1	-1	-1	-1	-1	-1	1	1000	0	3	0	0	0	1	1	1
110	2	1	-1	-1	-1	-1	-1	-1	-1	0	1	3	0	0	0	1	1	1
110	2	0	-1	1	-1	-1	-1	-1	-1	2000	0	3	0	0	0	1	1	1
110	2	0	-1	1	1	0	1	0	-1	2000	0	3	0	0	0	1	1	1
110	2	1	-1	-1	-1	-1	-1	-1	-1	0	1	3	0	0	0	1	1	1
111	2	0	1	1	-1	1	0	0	-1	1000	0	3	0	1	0	0	1	1
111	2	0	-1	1	-1	0	0	1	-1	500	0	3	0	1	0	0	1	1
111	2	1	-1	-1	-1	-1	-1	-1	-1	0	1	3	0	1	0	0	1	1
111	2	0	-1	-1	-1	-1	-1	-1	1	1500	0	3	0	1	0	0	1	1
111	2	0	-1	-1	-1	-1	-1	-1	1	1000	0	3	0	1	0	0	1	1
111	2	1	-1	-1	-1	-1	-1	-1	-1	0	1	3	0	1	0	0	1	1
111	2	0	-1	1	-1	-1	-1	-1	-1	2000	0	3	0	1	0	0	1	1
111	2	0	-1	1	1	0	1	0	-1	2000	0	3	0	1	0	0	1	1
111	2	1	-1	-1	-1	-1	-1	-1	-1	0	1	3	0	1	0	0	1	1
112	2	0	1	1	-1	1	0	0	-1	1000	0	3	0	0	0	1	0	1
112	2	0	-1	1	-1	0	0	1	-1	500	1	3	0	0	0	1	0	1
112	2	1	-1	-1	-1	-1	-1	-1	-1	0	0	3	0	0	0	1	0	1
112	2	0	-1	-1	-1	-1	-1	-1	1	1500	0	3	0	0	0	1	0	1
112	2	0	-1	-1	-1	-1	-1	-1	1	1000	0	3	0	0	0	1	0	1
112	2	1	-1	-1	-1	-1	-1	-1	-1	0	1	3	0	0	0	1	0	1
112	2	0	-1	1	-1	-1	-1	-1	-1	2000	0	3	0	0	0	1	0	1
112	2	0	-1	1	1	0	1	0	-1	2000	0	3	0	0	0	1	0	1
112	2	1	-1	-1	-1	-1	-1	-1	-1	0	1	3	0	0	0	1	0	1
113	2	0	1	1	-1	1	0	0	-1	1000	0	3	0	1	1	1	0	1
113	2	0	-1	1	-1	0	0	1	-1	500	1	3	0	1	1	1	0	1
113	2	1	-1	-1	-1	-1	-1	-1	-1	0	0	3	0	1	1	1	0	1
113	2	0	-1	-1	-1	-1	-1	-1	1	1500	0	3	0	1	1	1	0	1
113	2	0	-1	-1	-1	-1	-1	-1	1	1000	1	3	0	1	1	1	0	1
113	2	1	-1	-1	-1	-1	-1	-1	-1	0	0	3	0	1	1	1	0	1
113	2	0	-1	1	-1	-1	-1	-1	-1	2000	1	3	0	1	1	1	0	1
113	2	0	-1	1	1	0	1	0	-1	2000	0	3	0	1	1	1	0	1
113	2	1	-1	-1	-1	-1	-1	-1	-1	0	0	3	0	1	1	1	0	1
114	1	0	-1	1	-1	1	0	0	1	1500	1	3	0	1	0	1	0	1
114	1	0	-1	-1	1	-1	-1	-1	-1	1000	0	3	0	1	0	1	0	1
114	1	1	-1	-1	-1	-1	-1	-1	-1	0	0	3	0	1	0	1	0	1
114	1	0	-1	1	-1	0	1	0	1	500	0	3	0	1	0	1	0	1
114	1	0	1	1	1	-1	-1	-1	1	2000	1	3	0	1	0	1	0	1
114	1	1	-1	-1	-1	-1	-1	-1	-1	0	0	3	0	1	0	1	0	1
114	1	0	1	-1	1	-1	-1	-1	1	500	0	3	0	1	0	1	0	1
114	1	0	-1	-1	-1	-1	-1	-1	1	500	1	3	0	1	0	1	0	1
114	1	1	-1	-1	-1	-1	-1	-1	-1	0	0	3	0	1	0	1	0	1
115	1	0	-1	1	-1	1	0	0	1	1500	0	3	0	0	1	1	1	1
115	1	0	-1	-1	1	-1	-1	-1	-1	1000	1	3	0	0	1	1	1	1
115	1	1	-1	-1	-1	-1	-1	-1	-1	0	0	3	0	0	1	1	1	1
115	1	0	-1	1	-1	0	1	0	1	500	0	3	0	0	1	1	1	1
115	1	0	1	1	1	-1	-1	-1	1	2000	1	3	0	0	1	1	1	1
115	1	1	-1	-1	-1	-1	-1	-1	-1	0	0	3	0	0	1	1	1	1
115	1	0	1	-1	1	-1	-1	-1	1	500	1	3	0	0	1	1	1	1
115	1	0	-1	-1	-1	-1	-1	-1	1	500	0	3	0	0	1	1	1	1
115	1	1	-1	-1	-1	-1	-1	-1	-1	0	0	3	0	0	1	1	1	1
116	1	0	-1	1	-1	1	0	0	1	1500	0	3	1	0	0	1	1	1
116	1	0	-1	-1	1	-1	-1	-1	-1	1000	1	3	1	0	0	1	1	1
116	1	1	-1	-1	-1	-1	-1	-1	-1	0	0	3	1	0	0	1	1	1
116	1	0	-1	1	-1	0	1	0	1	500	0	3	1	0	0	1	1	1
116	1	0	1	1	1	-1	-1	-1	1	2000	1	3	1	0	0	1	1	1
116	1	1	-1	-1	-1	-1	-1	-1	-1	0	0	3	1	0	0	1	1	1
116	1	0	1	-1	1	-1	-1	-1	1	500	1	3	1	0	0	1	1	1
116	1	0	-1	-1	-1	-1	-1	-1	1	500	0	3	1	0	0	1	1	1
116	1	1	-1	-1	-1	-1	-1	-1	-1	0	0	3	1	0	0	1	1	1
117	1	0	-1	1	-1	1	0	0	1	1500	0	3	0	1	1	1	0	1
117	1	0	-1	-1	1	-1	-1	-1	-1	1000	1	3	0	1	1	1	0	1
117	1	1	-1	-1	-1	-1	-1	-1	-1	0	0	3	0	1	1	1	0	1
117	1	0	-1	1	-1	0	1	0	1	500	0	3	0	1	1	1	0	1
117	1	0	1	1	1	-1	-1	-1	1	2000	1	3	0	1	1	1	0	1
117	1	1	-1	-1	-1	-1	-1	-1	-1	0	0	3	0	1	1	1	0	1
117	1	0	1	-1	1	-1	-1	-1	1	500	1	3	0	1	1	1	0	1
117	1	0	-1	-1	-1	-1	-1	-1	1	500	0	3	0	1	1	1	0	1
117	1	1	-1	-1	-1	-1	-1	-1	-1	0	0	3	0	1	1	1	0	1
118	1	0	-1	1	-1	1	0	0	1	1500	0	3	0	0	0	1	1	1
118	1	0	-1	-1	1	-1	-1	-1	-1	1000	1	3	0	0	0	1	1	1
118	1	1	-1	-1	-1	-1	-1	-1	-1	0	0	3	0	0	0	1	1	1
118	1	0	-1	1	-1	0	1	0	1	500	1	3	0	0	0	1	1	1
118	1	0	1	1	1	-1	-1	-1	1	2000	0	3	0	0	0	1	1	1
118	1	1	-1	-1	-1	-1	-1	-1	-1	0	0	3	0	0	0	1	1	1
118	1	0	1	-1	1	-1	-1	-1	1	500	1	3	0	0	0	1	1	1
118	1	0	-1	-1	-1	-1	-1	-1	1	500	0	3	0	0	0	1	1	1
118	1	1	-1	-1	-1	-1	-1	-1	-1	0	0	3	0	0	0	1	1	1
119	1	0	-1	1	-1	1	0	0	1	1500	0	3	1	1	0	1	0	1
119	1	0	-1	-1	1	-1	-1	-1	-1	1000	1	3	1	1	0	1	0	1
119	1	1	-1	-1	-1	-1	-1	-1	-1	0	0	3	1	1	0	1	0	1
119	1	0	-1	1	-1	0	1	0	1	500	1	3	1	1	0	1	0	1
119	1	0	1	1	1	-1	-1	-1	1	2000	0	3	1	1	0	1	0	1
119	1	1	-1	-1	-1	-1	-1	-1	-1	0	0	3	1	1	0	1	0	1
119	1	0	1	-1	1	-1	-1	-1	1	500	0	3	1	1	0	1	0	1
119	1	0	-1	-1	-1	-1	-1	-1	1	500	1	3	1	1	0	1	0	1
119	1	1	-1	-1	-1	-1	-1	-1	-1	0	0	3	1	1	0	1	0	1
120	1	0	-1	1	-1	1	0	0	1	1500	0	3	0	1	0	0	1	1
120	1	0	-1	-1	1	-1	-1	-1	-1	1000	0	3	0	1	0	0	1	1
120	1	1	-1	-1	-1	-1	-1	-1	-1	0	1	3	0	1	0	0	1	1
120	1	0	-1	1	-1	0	1	0	1	500	0	3	0	1	0	0	1	1
120	1	0	1	1	1	-1	-1	-1	1	2000	0	3	0	1	0	0	1	1
120	1	1	-1	-1	-1	-1	-1	-1	-1	0	1	3	0	1	0	0	1	1
120	1	0	1	-1	1	-1	-1	-1	1	500	0	3	0	1	0	0	1	1
120	1	0	-1	-1	-1	-1	-1	-1	1	500	0	3	0	1	0	0	1	1
120	1	1	-1	-1	-1	-1	-1	-1	-1	0	1	3	0	1	0	0	1	1
121	1	0	-1	1	-1	1	0	0	1	1500	0	3	0	0	0	1	1	1
121	1	0	-1	-1	1	-1	-1	-1	-1	1000	0	3	0	0	0	1	1	1
121	1	1	-1	-1	-1	-1	-1	-1	-1	0	1	3	0	0	0	1	1	1
121	1	0	-1	1	-1	0	1	0	1	500	0	3	0	0	0	1	1	1
121	1	0	1	1	1	-1	-1	-1	1	2000	0	3	0	0	0	1	1	1
121	1	1	-1	-1	-1	-1	-1	-1	-1	0	1	3	0	0	0	1	1	1
121	1	0	1	-1	1	-1	-1	-1	1	500	0	3	0	0	0	1	1	1
121	1	0	-1	-1	-1	-1	-1	-1	1	500	0	3	0	0	0	1	1	1
121	1	1	-1	-1	-1	-1	-1	-1	-1	0	1	3	0	0	0	1	1	1
122	2	0	1	1	-1	1	0	0	-1	1000	0	3	0	1	0	1	1	1
122	2	0	-1	1	-1	0	0	1	-1	500	0	3	0	1	0	1	1	1
122	2	1	-1	-1	-1	-1	-1	-1	-1	0	1	3	0	1	0	1	1	1
122	2	0	-1	-1	-1	-1	-1	-1	1	1500	0	3	0	1	0	1	1	1
122	2	0	-1	-1	-1	-1	-1	-1	1	1000	0	3	0	1	0	1	1	1
122	2	1	-1	-1	-1	-1	-1	-1	-1	0	1	3	0	1	0	1	1	1
122	2	0	-1	1	-1	-1	-1	-1	-1	2000	0	3	0	1	0	1	1	1
122	2	0	-1	1	1	0	1	0	-1	2000	0	3	0	1	0	1	1	1
122	2	1	-1	-1	-1	-1	-1	-1	-1	0	1	3	0	1	0	1	1	1
123	2	0	1	1	-1	1	0	0	-1	1000	0	3	0	1	1	1	1	1
123	2	0	-1	1	-1	0	0	1	-1	500	1	3	0	1	1	1	1	1
123	2	1	-1	-1	-1	-1	-1	-1	-1	0	0	3	0	1	1	1	1	1
123	2	0	-1	-1	-1	-1	-1	-1	1	1500	0	3	0	1	1	1	1	1
123	2	0	-1	-1	-1	-1	-1	-1	1	1000	0	3	0	1	1	1	1	1
123	2	1	-1	-1	-1	-1	-1	-1	-1	0	1	3	0	1	1	1	1	1
123	2	0	-1	1	-1	-1	-1	-1	-1	2000	0	3	0	1	1	1	1	1
123	2	0	-1	1	1	0	1	0	-1	2000	1	3	0	1	1	1	1	1
123	2	1	-1	-1	-1	-1	-1	-1	-1	0	0	3	0	1	1	1	1	1
124	1	0	-1	1	-1	1	0	0	1	1500	0	3	1	0	0	1	0	1
124	1	0	-1	-1	1	-1	-1	-1	-1	1000	1	3	1	0	0	1	0	1
124	1	1	-1	-1	-1	-1	-1	-1	-1	0	0	3	1	0	0	1	0	1
124	1	0	-1	1	-1	0	1	0	1	500	0	3	1	0	0	1	0	1
124	1	0	1	1	1	-1	-1	-1	1	2000	0	3	1	0	0	1	0	1
124	1	1	-1	-1	-1	-1	-1	-1	-1	0	1	3	1	0	0	1	0	1
124	1	0	1	-1	1	-1	-1	-1	1	500	0	3	1	0	0	1	0	1
124	1	0	-1	-1	-1	-1	-1	-1	1	500	1	3	1	0	0	1	0	1
124	1	1	-1	-1	-1	-1	-1	-1	-1	0	0	3	1	0	0	1	0	1
125	2	0	1	1	-1	1	0	0	-1	1000	0	3	0	1	1	1	1	1
125	2	0	-1	1	-1	0	0	1	-1	500	0	3	0	1	1	1	1	1
125	2	1	-1	-1	-1	-1	-1	-1	-1	0	1	3	0	1	1	1	1	1
125	2	0	-1	-1	-1	-1	-1	-1	1	1500	0	3	0	1	1	1	1	1
125	2	0	-1	-1	-1	-1	-1	-1	1	1000	0	3	0	1	1	1	1	1
125	2	1	-1	-1	-1	-1	-1	-1	-1	0	1	3	0	1	1	1	1	1
125	2	0	-1	1	-1	-1	-1	-1	-1	2000	0	3	0	1	1	1	1	1
125	2	0	-1	1	1	0	1	0	-1	2000	0	3	0	1	1	1	1	1
125	2	1	-1	-1	-1	-1	-1	-1	-1	0	1	3	0	1	1	1	1	1
126	2	0	1	1	-1	1	0	0	-1	1000	0	3	0	1	1	1	0	1
126	2	0	-1	1	-1	0	0	1	-1	500	0	3	0	1	1	1	0	1
126	2	1	-1	-1	-1	-1	-1	-1	-1	0	1	3	0	1	1	1	0	1
126	2	0	-1	-1	-1	-1	-1	-1	1	1500	0	3	0	1	1	1	0	1
126	2	0	-1	-1	-1	-1	-1	-1	1	1000	0	3	0	1	1	1	0	1
126	2	1	-1	-1	-1	-1	-1	-1	-1	0	1	3	0	1	1	1	0	1
126	2	0	-1	1	-1	-1	-1	-1	-1	2000	0	3	0	1	1	1	0	1
126	2	0	-1	1	1	0	1	0	-1	2000	0	3	0	1	1	1	0	1
126	2	1	-1	-1	-1	-1	-1	-1	-1	0	1	3	0	1	1	1	0	1
127	2	0	1	1	-1	1	0	0	-1	1000	1	3	1	0	1	1	1	1
127	2	0	-1	1	-1	0	0	1	-1	500	0	3	1	0	1	1	1	1
127	2	1	-1	-1	-1	-1	-1	-1	-1	0	0	3	1	0	1	1	1	1
127	2	0	-1	-1	-1	-1	-1	-1	1	1500	1	3	1	0	1	1	1	1
127	2	0	-1	-1	-1	-1	-1	-1	1	1000	0	3	1	0	1	1	1	1
127	2	1	-1	-1	-1	-1	-1	-1	-1	0	0	3	1	0	1	1	1	1
127	2	0	-1	1	-1	-1	-1	-1	-1	2000	0	3	1	0	1	1	1	1
127	2	0	-1	1	1	0	1	0	-1	2000	1	3	1	0	1	1	1	1
127	2	1	-1	-1	-1	-1	-1	-1	-1	0	0	3	1	0	1	1	1	1
128	1	0	-1	1	-1	1	0	0	1	1500	0	3	0	0	0	0	1	1
128	1	0	-1	-1	1	-1	-1	-1	-1	1000	1	3	0	0	0	0	1	1
128	1	1	-1	-1	-1	-1	-1	-1	-1	0	0	3	0	0	0	0	1	1
128	1	0	-1	1	-1	0	1	0	1	500	0	3	0	0	0	0	1	1
128	1	0	1	1	1	-1	-1	-1	1	2000	1	3	0	0	0	0	1	1
128	1	1	-1	-1	-1	-1	-1	-1	-1	0	0	3	0	0	0	0	1	1
128	1	0	1	-1	1	-1	-1	-1	1	500	0	3	0	0	0	0	1	1
128	1	0	-1	-1	-1	-1	-1	-1	1	500	1	3	0	0	0	0	1	1
128	1	1	-1	-1	-1	-1	-1	-1	-1	0	0	3	0	0	0	0	1	1
129	2	0	1	1	-1	1	0	0	-1	1000	0	3	1	0	0	1	1	1
129	2	0	-1	1	-1	0	0	1	-1	500	0	3	1	0	0	1	1	1
129	2	1	-1	-1	-1	-1	-1	-1	-1	0	1	3	1	0	0	1	1	1
129	2	0	-1	-1	-1	-1	-1	-1	1	1500	0	3	1	0	0	1	1	1
129	2	0	-1	-1	-1	-1	-1	-1	1	1000	0	3	1	0	0	1	1	1
129	2	1	-1	-1	-1	-1	-1	-1	-1	0	1	3	1	0	0	1	1	1
129	2	0	-1	1	-1	-1	-1	-1	-1	2000	0	3	1	0	0	1	1	1
129	2	0	-1	1	1	0	1	0	-1	2000	0	3	1	0	0	1	1	1
129	2	1	-1	-1	-1	-1	-1	-1	-1	0	1	3	1	0	0	1	1	1
130	2	0	1	1	-1	1	0	0	-1	1000	0	3	0	0	1	1	1	1
130	2	0	-1	1	-1	0	0	1	-1	500	0	3	0	0	1	1	1	1
130	2	1	-1	-1	-1	-1	-1	-1	-1	0	1	3	0	0	1	1	1	1
130	2	0	-1	-1	-1	-1	-1	-1	1	1500	0	3	0	0	1	1	1	1
130	2	0	-1	-1	-1	-1	-1	-1	1	1000	0	3	0	0	1	1	1	1
130	2	1	-1	-1	-1	-1	-1	-1	-1	0	1	3	0	0	1	1	1	1
130	2	0	-1	1	-1	-1	-1	-1	-1	2000	0	3	0	0	1	1	1	1
130	2	0	-1	1	1	0	1	0	-1	2000	0	3	0	0	1	1	1	1
130	2	1	-1	-1	-1	-1	-1	-1	-1	0	1	3	0	0	1	1	1	1
131	1	0	-1	1	-1	1	0	0	1	1500	0	3	1	0	1	1	1	1
131	1	0	-1	-1	1	-1	-1	-1	-1	1000	1	3	1	0	1	1	1	1
131	1	1	-1	-1	-1	-1	-1	-1	-1	0	0	3	1	0	1	1	1	1
131	1	0	-1	1	-1	0	1	0	1	500	0	3	1	0	1	1	1	1
131	1	0	1	1	1	-1	-1	-1	1	2000	0	3	1	0	1	1	1	1
131	1	1	-1	-1	-1	-1	-1	-1	-1	0	1	3	1	0	1	1	1	1
131	1	0	1	-1	1	-1	-1	-1	1	500	1	3	1	0	1	1	1	1
131	1	0	-1	-1	-1	-1	-1	-1	1	500	0	3	1	0	1	1	1	1
131	1	1	-1	-1	-1	-1	-1	-1	-1	0	0	3	1	0	1	1	1	1
132	2	0	1	1	-1	1	0	0	-1	1000	0	3	1	0	0	1	0	1
132	2	0	-1	1	-1	0	0	1	-1	500	0	3	1	0	0	1	0	1
132	2	1	-1	-1	-1	-1	-1	-1	-1	0	1	3	1	0	0	1	0	1
132	2	0	-1	-1	-1	-1	-1	-1	1	1500	0	3	1	0	0	1	0	1
132	2	0	-1	-1	-1	-1	-1	-1	1	1000	0	3	1	0	0	1	0	1
132	2	1	-1	-1	-1	-1	-1	-1	-1	0	1	3	1	0	0	1	0	1
132	2	0	-1	1	-1	-1	-1	-1	-1	2000	0	3	1	0	0	1	0	1
132	2	0	-1	1	1	0	1	0	-1	2000	0	3	1	0	0	1	0	1
132	2	1	-1	-1	-1	-1	-1	-1	-1	0	1	3	1	0	0	1	0	1
133	2	0	1	1	-1	1	0	0	-1	1000	0	3	0	0	1	1	1	1
133	2	0	-1	1	-1	0	0	1	-1	500	0	3	0	0	1	1	1	1
133	2	1	-1	-1	-1	-1	-1	-1	-1	0	1	3	0	0	1	1	1	1
133	2	0	-1	-1	-1	-1	-1	-1	1	1500	0	3	0	0	1	1	1	1
133	2	0	-1	-1	-1	-1	-1	-1	1	1000	0	3	0	0	1	1	1	1
133	2	1	-1	-1	-1	-1	-1	-1	-1	0	1	3	0	0	1	1	1	1
133	2	0	-1	1	-1	-1	-1	-1	-1	2000	0	3	0	0	1	1	1	1
133	2	0	-1	1	1	0	1	0	-1	2000	0	3	0	0	1	1	1	1
133	2	1	-1	-1	-1	-1	-1	-1	-1	0	1	3	0	0	1	1	1	1
134	1	0	-1	1	-1	1	0	0	1	1500	0	3	0	1	0	1	0	1
134	1	0	-1	-1	1	-1	-1	-1	-1	1000	1	3	0	1	0	1	0	1
134	1	1	-1	-1	-1	-1	-1	-1	-1	0	0	3	0	1	0	1	0	1
134	1	0	-1	1	-1	0	1	0	1	500	1	3	0	1	0	1	0	1
134	1	0	1	1	1	-1	-1	-1	1	2000	0	3	0	1	0	1	0	1
134	1	1	-1	-1	-1	-1	-1	-1	-1	0	0	3	0	1	0	1	0	1
134	1	0	1	-1	1	-1	-1	-1	1	500	1	3	0	1	0	1	0	1
134	1	0	-1	-1	-1	-1	-1	-1	1	500	0	3	0	1	0	1	0	1
134	1	1	-1	-1	-1	-1	-1	-1	-1	0	0	3	0	1	0	1	0	1
135	1	0	-1	1	-1	1	0	0	1	1500	1	3	0	1	0	0	1	1
135	1	0	-1	-1	1	-1	-1	-1	-1	1000	0	3	0	1	0	0	1	1
135	1	1	-1	-1	-1	-1	-1	-1	-1	0	0	3	0	1	0	0	1	1
135	1	0	-1	1	-1	0	1	0	1	500	0	3	0	1	0	0	1	1
135	1	0	1	1	1	-1	-1	-1	1	2000	1	3	0	1	0	0	1	1
135	1	1	-1	-1	-1	-1	-1	-1	-1	0	0	3	0	1	0	0	1	1
135	1	0	1	-1	1	-1	-1	-1	1	500	1	3	0	1	0	0	1	1
135	1	0	-1	-1	-1	-1	-1	-1	1	500	0	3	0	1	0	0	1	1
135	1	1	-1	-1	-1	-1	-1	-1	-1	0	0	3	0	1	0	0	1	1
136	1	0	-1	1	-1	1	0	0	1	1500	1	3	0	0	1	1	1	1
136	1	0	-1	-1	1	-1	-1	-1	-1	1000	0	3	0	0	1	1	1	1
136	1	1	-1	-1	-1	-1	-1	-1	-1	0	0	3	0	0	1	1	1	1
136	1	0	-1	1	-1	0	1	0	1	500	0	3	0	0	1	1	1	1
136	1	0	1	1	1	-1	-1	-1	1	2000	1	3	0	0	1	1	1	1
136	1	1	-1	-1	-1	-1	-1	-1	-1	0	0	3	0	0	1	1	1	1
136	1	0	1	-1	1	-1	-1	-1	1	500	1	3	0	0	1	1	1	1
136	1	0	-1	-1	-1	-1	-1	-1	1	500	0	3	0	0	1	1	1	1
136	1	1	-1	-1	-1	-1	-1	-1	-1	0	0	3	0	0	1	1	1	1
137	1	0	-1	1	-1	1	0	0	1	1500	0	3	0	0	0	1	1	1
137	1	0	-1	-1	1	-1	-1	-1	-1	1000	0	3	0	0	0	1	1	1
137	1	1	-1	-1	-1	-1	-1	-1	-1	0	1	3	0	0	0	1	1	1
137	1	0	-1	1	-1	0	1	0	1	500	1	3	0	0	0	1	1	1
137	1	0	1	1	1	-1	-1	-1	1	2000	0	3	0	0	0	1	1	1
137	1	1	-1	-1	-1	-1	-1	-1	-1	0	0	3	0	0	0	1	1	1
137	1	0	1	-1	1	-1	-1	-1	1	500	1	3	0	0	0	1	1	1
137	1	0	-1	-1	-1	-1	-1	-1	1	500	0	3	0	0	0	1	1	1
137	1	1	-1	-1	-1	-1	-1	-1	-1	0	0	3	0	0	0	1	1	1
138	1	0	-1	1	-1	1	0	0	1	1500	1	3	0	0	0	1	1	1
138	1	0	-1	-1	1	-1	-1	-1	-1	1000	0	3	0	0	0	1	1	1
138	1	1	-1	-1	-1	-1	-1	-1	-1	0	0	3	0	0	0	1	1	1
138	1	0	-1	1	-1	0	1	0	1	500	0	3	0	0	0	1	1	1
138	1	0	1	1	1	-1	-1	-1	1	2000	1	3	0	0	0	1	1	1
138	1	1	-1	-1	-1	-1	-1	-1	-1	0	0	3	0	0	0	1	1	1
138	1	0	1	-1	1	-1	-1	-1	1	500	1	3	0	0	0	1	1	1
138	1	0	-1	-1	-1	-1	-1	-1	1	500	0	3	0	0	0	1	1	1
138	1	1	-1	-1	-1	-1	-1	-1	-1	0	0	3	0	0	0	1	1	1
139	2	0	1	1	-1	1	0	0	-1	1000	0	3	0	1	0	1	1	1
139	2	0	-1	1	-1	0	0	1	-1	500	0	3	0	1	0	1	1	1
139	2	1	-1	-1	-1	-1	-1	-1	-1	0	1	3	0	1	0	1	1	1
139	2	0	-1	-1	-1	-1	-1	-1	1	1500	0	3	0	1	0	1	1	1
139	2	0	-1	-1	-1	-1	-1	-1	1	1000	0	3	0	1	0	1	1	1
139	2	1	-1	-1	-1	-1	-1	-1	-1	0	1	3	0	1	0	1	1	1
139	2	0	-1	1	-1	-1	-1	-1	-1	2000	0	3	0	1	0	1	1	1
139	2	0	-1	1	1	0	1	0	-1	2000	0	3	0	1	0	1	1	1
139	2	1	-1	-1	-1	-1	-1	-1	-1	0	1	3	0	1	0	1	1	1
140	1	0	-1	1	-1	1	0	0	1	1500	1	3	0	1	0	1	1	1
140	1	0	-1	-1	1	-1	-1	-1	-1	1000	0	3	0	1	0	1	1	1
140	1	1	-1	-1	-1	-1	-1	-1	-1	0	0	3	0	1	0	1	1	1
140	1	0	-1	1	-1	0	1	0	1	500	0	3	0	1	0	1	1	1
140	1	0	1	1	1	-1	-1	-1	1	2000	1	3	0	1	0	1	1	1
140	1	1	-1	-1	-1	-1	-1	-1	-1	0	0	3	0	1	0	1	1	1
140	1	0	1	-1	1	-1	-1	-1	1	500	1	3	0	1	0	1	1	1
140	1	0	-1	-1	-1	-1	-1	-1	1	500	0	3	0	1	0	1	1	1
140	1	1	-1	-1	-1	-1	-1	-1	-1	0	0	3	0	1	0	1	1	1
141	1	0	-1	1	-1	1	0	0	1	1500	1	3	0	0	0	0	1	1
141	1	0	-1	-1	1	-1	-1	-1	-1	1000	0	3	0	0	0	0	1	1
141	1	1	-1	-1	-1	-1	-1	-1	-1	0	0	3	0	0	0	0	1	1
141	1	0	-1	1	-1	0	1	0	1	500	0	3	0	0	0	0	1	1
141	1	0	1	1	1	-1	-1	-1	1	2000	1	3	0	0	0	0	1	1
141	1	1	-1	-1	-1	-1	-1	-1	-1	0	0	3	0	0	0	0	1	1
141	1	0	1	-1	1	-1	-1	-1	1	500	1	3	0	0	0	0	1	1
141	1	0	-1	-1	-1	-1	-1	-1	1	500	0	3	0	0	0	0	1	1
141	1	1	-1	-1	-1	-1	-1	-1	-1	0	0	3	0	0	0	0	1	1
142	1	0	-1	1	-1	1	0	0	1	1500	0	3	1	0	0	1	1	1
142	1	0	-1	-1	1	-1	-1	-1	-1	1000	0	3	1	0	0	1	1	1
142	1	1	-1	-1	-1	-1	-1	-1	-1	0	1	3	1	0	0	1	1	1
142	1	0	-1	1	-1	0	1	0	1	500	1	3	1	0	0	1	1	1
142	1	0	1	1	1	-1	-1	-1	1	2000	0	3	1	0	0	1	1	1
142	1	1	-1	-1	-1	-1	-1	-1	-1	0	0	3	1	0	0	1	1	1
142	1	0	1	-1	1	-1	-1	-1	1	500	1	3	1	0	0	1	1	1
142	1	0	-1	-1	-1	-1	-1	-1	1	500	0	3	1	0	0	1	1	1
142	1	1	-1	-1	-1	-1	-1	-1	-1	0	0	3	1	0	0	1	1	1
143	1	0	-1	1	-1	1	0	0	1	1500	1	3	1	0	0	1	1	1
143	1	0	-1	-1	1	-1	-1	-1	-1	1000	0	3	1	0	0	1	1	1
143	1	1	-1	-1	-1	-1	-1	-1	-1	0	0	3	1	0	0	1	1	1
143	1	0	-1	1	-1	0	1	0	1	500	0	3	1	0	0	1	1	1
143	1	0	1	1	1	-1	-1	-1	1	2000	1	3	1	0	0	1	1	1
143	1	1	-1	-1	-1	-1	-1	-1	-1	0	0	3	1	0	0	1	1	1
143	1	0	1	-1	1	-1	-1	-1	1	500	1	3	1	0	0	1	1	1
143	1	0	-1	-1	-1	-1	-1	-1	1	500	0	3	1	0	0	1	1	1
143	1	1	-1	-1	-1	-1	-1	-1	-1	0	0	3	1	0	0	1	1	1
144	1	0	-1	1	-1	1	0	0	1	1500	1	3	1	0	0	1	1	1
144	1	0	-1	-1	1	-1	-1	-1	-1	1000	0	3	1	0	0	1	1	1
144	1	1	-1	-1	-1	-1	-1	-1	-1	0	0	3	1	0	0	1	1	1
144	1	0	-1	1	-1	0	1	0	1	500	1	3	1	0	0	1	1	1
144	1	0	1	1	1	-1	-1	-1	1	2000	0	3	1	0	0	1	1	1
144	1	1	-1	-1	-1	-1	-1	-1	-1	0	0	3	1	0	0	1	1	1
144	1	0	1	-1	1	-1	-1	-1	1	500	0	3	1	0	0	1	1	1
144	1	0	-1	-1	-1	-1	-1	-1	1	500	1	3	1	0	0	1	1	1
144	1	1	-1	-1	-1	-1	-1	-1	-1	0	0	3	1	0	0	1	1	1
145	2	0	1	1	-1	1	0	0	-1	1000	1	3	0	0	1	1	1	1
145	2	0	-1	1	-1	0	0	1	-1	500	0	3	0	0	1	1	1	1
145	2	1	-1	-1	-1	-1	-1	-1	-1	0	0	3	0	0	1	1	1	1
145	2	0	-1	-1	-1	-1	-1	-1	1	1500	1	3	0	0	1	1	1	1
145	2	0	-1	-1	-1	-1	-1	-1	1	1000	0	3	0	0	1	1	1	1
145	2	1	-1	-1	-1	-1	-1	-1	-1	0	0	3	0	0	1	1	1	1
145	2	0	-1	1	-1	-1	-1	-1	-1	2000	0	3	0	0	1	1	1	1
145	2	0	-1	1	1	0	1	0	-1	2000	1	3	0	0	1	1	1	1
145	2	1	-1	-1	-1	-1	-1	-1	-1	0	0	3	0	0	1	1	1	1
146	2	0	1	1	-1	1	0	0	-1	1000	1	3	0	1	1	1	0	1
146	2	0	-1	1	-1	0	0	1	-1	500	0	3	0	1	1	1	0	1
146	2	1	-1	-1	-1	-1	-1	-1	-1	0	0	3	0	1	1	1	0	1
146	2	0	-1	-1	-1	-1	-1	-1	1	1500	1	3	0	1	1	1	0	1
146	2	0	-1	-1	-1	-1	-1	-1	1	1000	0	3	0	1	1	1	0	1
146	2	1	-1	-1	-1	-1	-1	-1	-1	0	0	3	0	1	1	1	0	1
146	2	0	-1	1	-1	-1	-1	-1	-1	2000	0	3	0	1	1	1	0	1
146	2	0	-1	1	1	0	1	0	-1	2000	1	3	0	1	1	1	0	1
146	2	1	-1	-1	-1	-1	-1	-1	-1	0	0	3	0	1	1	1	0	1
147	2	0	1	1	-1	1	0	0	-1	1000	1	3	0	0	0	0	1	1
147	2	0	-1	1	-1	0	0	1	-1	500	0	3	0	0	0	0	1	1
147	2	1	-1	-1	-1	-1	-1	-1	-1	0	0	3	0	0	0	0	1	1
147	2	0	-1	-1	-1	-1	-1	-1	1	1500	1	3	0	0	0	0	1	1
147	2	0	-1	-1	-1	-1	-1	-1	1	1000	0	3	0	0	0	0	1	1
147	2	1	-1	-1	-1	-1	-1	-1	-1	0	0	3	0	0	0	0	1	1
147	2	0	-1	1	-1	-1	-1	-1	-1	2000	0	3	0	0	0	0	1	1
147	2	0	-1	1	1	0	1	0	-1	2000	1	3	0	0	0	0	1	1
147	2	1	-1	-1	-1	-1	-1	-1	-1	0	0	3	0	0	0	0	1	1
148	2	0	1	1	-1	1	0	0	-1	1000	0	3	0	1	1	1	1	1
148	2	0	-1	1	-1	0	0	1	-1	500	1	3	0	1	1	1	1	1
148	2	1	-1	-1	-1	-1	-1	-1	-1	0	0	3	0	1	1	1	1	1
148	2	0	-1	-1	-1	-1	-1	-1	1	1500	0	3	0	1	1	1	1	1
148	2	0	-1	-1	-1	-1	-1	-1	1	1000	0	3	0	1	1	1	1	1
148	2	1	-1	-1	-1	-1	-1	-1	-1	0	1	3	0	1	1	1	1	1
148	2	0	-1	1	-1	-1	-1	-1	-1	2000	0	3	0	1	1	1	1	1
148	2	0	-1	1	1	0	1	0	-1	2000	1	3	0	1	1	1	1	1
148	2	1	-1	-1	-1	-1	-1	-1	-1	0	0	3	0	1	1	1	1	1
149	2	0	1	1	-1	1	0	0	-1	1000	0	3	0	0	0	1	1	1
149	2	0	-1	1	-1	0	0	1	-1	500	1	3	0	0	0	1	1	1
149	2	1	-1	-1	-1	-1	-1	-1	-1	0	0	3	0	0	0	1	1	1
149	2	0	-1	-1	-1	-1	-1	-1	1	1500	0	3	0	0	0	1	1	1
149	2	0	-1	-1	-1	-1	-1	-1	1	1000	0	3	0	0	0	1	1	1
149	2	1	-1	-1	-1	-1	-1	-1	-1	0	1	3	0	0	0	1	1	1
149	2	0	-1	1	-1	-1	-1	-1	-1	2000	0	3	0	0	0	1	1	1
149	2	0	-1	1	1	0	1	0	-1	2000	0	3	0	0	0	1	1	1
149	2	1	-1	-1	-1	-1	-1	-1	-1	0	1	3	0	0	0	1	1	1
150	2	0	1	1	-1	1	0	0	-1	1000	0	3	0	1	1	1	1	1
150	2	0	-1	1	-1	0	0	1	-1	500	1	3	0	1	1	1	1	1
150	2	1	-1	-1	-1	-1	-1	-1	-1	0	0	3	0	1	1	1	1	1
150	2	0	-1	-1	-1	-1	-1	-1	1	1500	0	3	0	1	1	1	1	1
150	2	0	-1	-1	-1	-1	-1	-1	1	1000	1	3	0	1	1	1	1	1
150	2	1	-1	-1	-1	-1	-1	-1	-1	0	0	3	0	1	1	1	1	1
150	2	0	-1	1	-1	-1	-1	-1	-1	2000	0	3	0	1	1	1	1	1
150	2	0	-1	1	1	0	1	0	-1	2000	0	3	0	1	1	1	1	1
150	2	1	-1	-1	-1	-1	-1	-1	-1	0	1	3	0	1	1	1	1	1
151	2	0	1	1	-1	1	0	0	-1	1000	0	3	0	0	1	1	1	1
151	2	0	-1	1	-1	0	0	1	-1	500	0	3	0	0	1	1	1	1
151	2	1	-1	-1	-1	-1	-1	-1	-1	0	1	3	0	0	1	1	1	1
151	2	0	-1	-1	-1	-1	-1	-1	1	1500	0	3	0	0	1	1	1	1
151	2	0	-1	-1	-1	-1	-1	-1	1	1000	1	3	0	0	1	1	1	1
151	2	1	-1	-1	-1	-1	-1	-1	-1	0	0	3	0	0	1	1	1	1
151	2	0	-1	1	-1	-1	-1	-1	-1	2000	0	3	0	0	1	1	1	1
151	2	0	-1	1	1	0	1	0	-1	2000	0	3	0	0	1	1	1	1
151	2	1	-1	-1	-1	-1	-1	-1	-1	0	1	3	0	0	1	1	1	1
152	2	0	1	1	-1	1	0	0	-1	1000	1	3	1	0	0	1	1	1
152	2	0	-1	1	-1	0	0	1	-1	500	0	3	1	0	0	1	1	1
152	2	1	-1	-1	-1	-1	-1	-1	-1	0	0	3	1	0	0	1	1	1
152	2	0	-1	-1	-1	-1	-1	-1	1	1500	1	3	1	0	0	1	1	1
152	2	0	-1	-1	-1	-1	-1	-1	1	1000	0	3	1	0	0	1	1	1
152	2	1	-1	-1	-1	-1	-1	-1	-1	0	0	3	1	0	0	1	1	1
152	2	0	-1	1	-1	-1	-1	-1	-1	2000	1	3	1	0	0	1	1	1
152	2	0	-1	1	1	0	1	0	-1	2000	0	3	1	0	0	1	1	1
152	2	1	-1	-1	-1	-1	-1	-1	-1	0	0	3	1	0	0	1	1	1
153	2	0	1	1	-1	1	0	0	-1	1000	1	3	1	0	1	1	1	1
153	2	0	-1	1	-1	0	0	1	-1	500	0	3	1	0	1	1	1	1
153	2	1	-1	-1	-1	-1	-1	-1	-1	0	0	3	1	0	1	1	1	1
153	2	0	-1	-1	-1	-1	-1	-1	1	1500	1	3	1	0	1	1	1	1
153	2	0	-1	-1	-1	-1	-1	-1	1	1000	0	3	1	0	1	1	1	1
153	2	1	-1	-1	-1	-1	-1	-1	-1	0	0	3	1	0	1	1	1	1
153	2	0	-1	1	-1	-1	-1	-1	-1	2000	0	3	1	0	1	1	1	1
153	2	0	-1	1	1	0	1	0	-1	2000	1	3	1	0	1	1	1	1
153	2	1	-1	-1	-1	-1	-1	-1	-1	0	0	3	1	0	1	1	1	1
154	2	0	1	1	-1	1	0	0	-1	1000	0	3	0	0	0	1	1	1
154	2	0	-1	1	-1	0	0	1	-1	500	1	3	0	0	0	1	1	1
154	2	1	-1	-1	-1	-1	-1	-1	-1	0	0	3	0	0	0	1	1	1
154	2	0	-1	-1	-1	-1	-1	-1	1	1500	0	3	0	0	0	1	1	1
154	2	0	-1	-1	-1	-1	-1	-1	1	1000	0	3	0	0	0	1	1	1
154	2	1	-1	-1	-1	-1	-1	-1	-1	0	1	3	0	0	0	1	1	1
154	2	0	-1	1	-1	-1	-1	-1	-1	2000	0	3	0	0	0	1	1	1
154	2	0	-1	1	1	0	1	0	-1	2000	0	3	0	0	0	1	1	1
154	2	1	-1	-1	-1	-1	-1	-1	-1	0	1	3	0	0	0	1	1	1
155	2	0	1	1	-1	1	0	0	-1	1000	1	3	1	0	0	1	1	1
155	2	0	-1	1	-1	0	0	1	-1	500	0	3	1	0	0	1	1	1
155	2	1	-1	-1	-1	-1	-1	-1	-1	0	0	3	1	0	0	1	1	1
155	2	0	-1	-1	-1	-1	-1	-1	1	1500	0	3	1	0	0	1	1	1
155	2	0	-1	-1	-1	-1	-1	-1	1	1000	1	3	1	0	0	1	1	1
155	2	1	-1	-1	-1	-1	-1	-1	-1	0	0	3	1	0	0	1	1	1
155	2	0	-1	1	-1	-1	-1	-1	-1	2000	0	3	1	0	0	1	1	1
155	2	0	-1	1	1	0	1	0	-1	2000	1	3	1	0	0	1	1	1
155	2	1	-1	-1	-1	-1	-1	-1	-1	0	0	3	1	0	0	1	1	1
156	2	0	1	1	-1	1	0	0	-1	1000	1	3	1	1	1	1	1	1
156	2	0	-1	1	-1	0	0	1	-1	500	0	3	1	1	1	1	1	1
156	2	1	-1	-1	-1	-1	-1	-1	-1	0	0	3	1	1	1	1	1	1
156	2	0	-1	-1	-1	-1	-1	-1	1	1500	1	3	1	1	1	1	1	1
156	2	0	-1	-1	-1	-1	-1	-1	1	1000	0	3	1	1	1	1	1	1
156	2	1	-1	-1	-1	-1	-1	-1	-1	0	0	3	1	1	1	1	1	1
156	2	0	-1	1	-1	-1	-1	-1	-1	2000	0	3	1	1	1	1	1	1
156	2	0	-1	1	1	0	1	0	-1	2000	1	3	1	1	1	1	1	1
156	2	1	-1	-1	-1	-1	-1	-1	-1	0	0	3	1	1	1	1	1	1
157	2	0	1	1	-1	1	0	0	-1	1000	1	3	0	0	0	1	1	1
157	2	0	-1	1	-1	0	0	1	-1	500	0	3	0	0	0	1	1	1
157	2	1	-1	-1	-1	-1	-1	-1	-1	0	0	3	0	0	0	1	1	1
157	2	0	-1	-1	-1	-1	-1	-1	1	1500	0	3	0	0	0	1	1	1
157	2	0	-1	-1	-1	-1	-1	-1	1	1000	1	3	0	0	0	1	1	1
157	2	1	-1	-1	-1	-1	-1	-1	-1	0	0	3	0	0	0	1	1	1
157	2	0	-1	1	-1	-1	-1	-1	-1	2000	0	3	0	0	0	1	1	1
157	2	0	-1	1	1	0	1	0	-1	2000	1	3	0	0	0	1	1	1
157	2	1	-1	-1	-1	-1	-1	-1	-1	0	0	3	0	0	0	1	1	1
158	2	0	1	1	-1	1	0	0	-1	1000	0	3	0	1	0	1	1	1
158	2	0	-1	1	-1	0	0	1	-1	500	1	3	0	1	0	1	1	1
158	2	1	-1	-1	-1	-1	-1	-1	-1	0	0	3	0	1	0	1	1	1
158	2	0	-1	-1	-1	-1	-1	-1	1	1500	0	3	0	1	0	1	1	1
158	2	0	-1	-1	-1	-1	-1	-1	1	1000	0	3	0	1	0	1	1	1
158	2	1	-1	-1	-1	-1	-1	-1	-1	0	1	3	0	1	0	1	1	1
158	2	0	-1	1	-1	-1	-1	-1	-1	2000	0	3	0	1	0	1	1	1
158	2	0	-1	1	1	0	1	0	-1	2000	0	3	0	1	0	1	1	1
158	2	1	-1	-1	-1	-1	-1	-1	-1	0	1	3	0	1	0	1	1	1
159	2	0	1	1	-1	1	0	0	-1	1000	1	3	0	1	0	1	1	1
159	2	0	-1	1	-1	0	0	1	-1	500	0	3	0	1	0	1	1	1
159	2	1	-1	-1	-1	-1	-1	-1	-1	0	0	3	0	1	0	1	1	1
159	2	0	-1	-1	-1	-1	-1	-1	1	1500	0	3	0	1	0	1	1	1
159	2	0	-1	-1	-1	-1	-1	-1	1	1000	1	3	0	1	0	1	1	1
159	2	1	-1	-1	-1	-1	-1	-1	-1	0	0	3	0	1	0	1	1	1
159	2	0	-1	1	-1	-1	-1	-1	-1	2000	0	3	0	1	0	1	1	1
159	2	0	-1	1	1	0	1	0	-1	2000	1	3	0	1	0	1	1	1
159	2	1	-1	-1	-1	-1	-1	-1	-1	0	0	3	0	1	0	1	1	1
160	2	0	1	1	-1	1	0	0	-1	1000	0	3	0	0	0	0	1	1
160	2	0	-1	1	-1	0	0	1	-1	500	0	3	0	0	0	0	1	1
160	2	1	-1	-1	-1	-1	-1	-1	-1	0	1	3	0	0	0	0	1	1
160	2	0	-1	-1	-1	-1	-1	-1	1	1500	0	3	0	0	0	0	1	1
160	2	0	-1	-1	-1	-1	-1	-1	1	1000	0	3	0	0	0	0	1	1
160	2	1	-1	-1	-1	-1	-1	-1	-1	0	1	3	0	0	0	0	1	1
160	2	0	-1	1	-1	-1	-1	-1	-1	2000	0	3	0	0	0	0	1	1
160	2	0	-1	1	1	0	1	0	-1	2000	0	3	0	0	0	0	1	1
160	2	1	-1	-1	-1	-1	-1	-1	-1	0	1	3	0	0	0	0	1	1
161	2	0	1	1	-1	1	0	0	-1	1000	1	3	0	1	1	1	1	1
161	2	0	-1	1	-1	0	0	1	-1	500	0	3	0	1	1	1	1	1
161	2	1	-1	-1	-1	-1	-1	-1	-1	0	0	3	0	1	1	1	1	1
161	2	0	-1	-1	-1	-1	-1	-1	1	1500	1	3	0	1	1	1	1	1
161	2	0	-1	-1	-1	-1	-1	-1	1	1000	0	3	0	1	1	1	1	1
161	2	1	-1	-1	-1	-1	-1	-1	-1	0	0	3	0	1	1	1	1	1
161	2	0	-1	1	-1	-1	-1	-1	-1	2000	0	3	0	1	1	1	1	1
161	2	0	-1	1	1	0	1	0	-1	2000	1	3	0	1	1	1	1	1
161	2	1	-1	-1	-1	-1	-1	-1	-1	0	0	3	0	1	1	1	1	1
162	2	0	1	1	-1	1	0	0	-1	1000	0	3	0	0	1	1	1	1
162	2	0	-1	1	-1	0	0	1	-1	500	1	3	0	0	1	1	1	1
162	2	1	-1	-1	-1	-1	-1	-1	-1	0	0	3	0	0	1	1	1	1
162	2	0	-1	-1	-1	-1	-1	-1	1	1500	0	3	0	0	1	1	1	1
162	2	0	-1	-1	-1	-1	-1	-1	1	1000	1	3	0	0	1	1	1	1
162	2	1	-1	-1	-1	-1	-1	-1	-1	0	0	3	0	0	1	1	1	1
162	2	0	-1	1	-1	-1	-1	-1	-1	2000	0	3	0	0	1	1	1	1
162	2	0	-1	1	1	0	1	0	-1	2000	1	3	0	0	1	1	1	1
162	2	1	-1	-1	-1	-1	-1	-1	-1	0	0	3	0	0	1	1	1	1
163	1	0	-1	1	-1	1	0	0	1	1500	0	3	0	1	0	1	1	1
163	1	0	-1	-1	1	-1	-1	-1	-1	1000	0	3	0	1	0	1	1	1
163	1	1	-1	-1	-1	-1	-1	-1	-1	0	1	3	0	1	0	1	1	1
163	1	0	-1	1	-1	0	1	0	1	500	1	3	0	1	0	1	1	1
163	1	0	1	1	1	-1	-1	-1	1	2000	0	3	0	1	0	1	1	1
163	1	1	-1	-1	-1	-1	-1	-1	-1	0	0	3	0	1	0	1	1	1
163	1	0	1	-1	1	-1	-1	-1	1	500	0	3	0	1	0	1	1	1
163	1	0	-1	-1	-1	-1	-1	-1	1	500	1	3	0	1	0	1	1	1
163	1	1	-1	-1	-1	-1	-1	-1	-1	0	0	3	0	1	0	1	1	1
164	1	0	-1	1	-1	1	0	0	1	1500	0	3	0	1	0	1	1	1
164	1	0	-1	-1	1	-1	-1	-1	-1	1000	0	3	0	1	0	1	1	1
164	1	1	-1	-1	-1	-1	-1	-1	-1	0	1	3	0	1	0	1	1	1
164	1	0	-1	1	-1	0	1	0	1	500	1	3	0	1	0	1	1	1
164	1	0	1	1	1	-1	-1	-1	1	2000	0	3	0	1	0	1	1	1
164	1	1	-1	-1	-1	-1	-1	-1	-1	0	0	3	0	1	0	1	1	1
164	1	0	1	-1	1	-1	-1	-1	1	500	0	3	0	1	0	1	1	1
164	1	0	-1	-1	-1	-1	-1	-1	1	500	1	3	0	1	0	1	1	1
164	1	1	-1	-1	-1	-1	-1	-1	-1	0	0	3	0	1	0	1	1	1
165	1	0	-1	1	-1	1	0	0	1	1500	0	3	0	0	0	1	0	1
165	1	0	-1	-1	1	-1	-1	-1	-1	1000	1	3	0	0	0	1	0	1
165	1	1	-1	-1	-1	-1	-1	-1	-1	0	0	3	0	0	0	1	0	1
165	1	0	-1	1	-1	0	1	0	1	500	1	3	0	0	0	1	0	1
165	1	0	1	1	1	-1	-1	-1	1	2000	0	3	0	0	0	1	0	1
165	1	1	-1	-1	-1	-1	-1	-1	-1	0	0	3	0	0	0	1	0	1
165	1	0	1	-1	1	-1	-1	-1	1	500	1	3	0	0	0	1	0	1
165	1	0	-1	-1	-1	-1	-1	-1	1	500	0	3	0	0	0	1	0	1
165	1	1	-1	-1	-1	-1	-1	-1	-1	0	0	3	0	0	0	1	0	1
166	1	0	-1	1	-1	1	0	0	1	1500	0	3	0	1	1	1	0	1
166	1	0	-1	-1	1	-1	-1	-1	-1	1000	0	3	0	1	1	1	0	1
166	1	1	-1	-1	-1	-1	-1	-1	-1	0	1	3	0	1	1	1	0	1
166	1	0	-1	1	-1	0	1	0	1	500	1	3	0	1	1	1	0	1
166	1	0	1	1	1	-1	-1	-1	1	2000	0	3	0	1	1	1	0	1
166	1	1	-1	-1	-1	-1	-1	-1	-1	0	0	3	0	1	1	1	0	1
166	1	0	1	-1	1	-1	-1	-1	1	500	1	3	0	1	1	1	0	1
166	1	0	-1	-1	-1	-1	-1	-1	1	500	0	3	0	1	1	1	0	1
166	1	1	-1	-1	-1	-1	-1	-1	-1	0	0	3	0	1	1	1	0	1
167	1	0	-1	1	-1	1	0	0	1	1500	0	3	0	1	0	1	1	1
167	1	0	-1	-1	1	-1	-1	-1	-1	1000	0	3	0	1	0	1	1	1
167	1	1	-1	-1	-1	-1	-1	-1	-1	0	1	3	0	1	0	1	1	1
167	1	0	-1	1	-1	0	1	0	1	500	0	3	0	1	0	1	1	1
167	1	0	1	1	1	-1	-1	-1	1	2000	0	3	0	1	0	1	1	1
167	1	1	-1	-1	-1	-1	-1	-1	-1	0	1	3	0	1	0	1	1	1
167	1	0	1	-1	1	-1	-1	-1	1	500	0	3	0	1	0	1	1	1
167	1	0	-1	-1	-1	-1	-1	-1	1	500	0	3	0	1	0	1	1	1
167	1	1	-1	-1	-1	-1	-1	-1	-1	0	1	3	0	1	0	1	1	1
168	2	0	1	1	-1	1	0	0	-1	1000	1	3	0	0	0	0	1	1
168	2	0	-1	1	-1	0	0	1	-1	500	0	3	0	0	0	0	1	1
168	2	1	-1	-1	-1	-1	-1	-1	-1	0	0	3	0	0	0	0	1	1
168	2	0	-1	-1	-1	-1	-1	-1	1	1500	1	3	0	0	0	0	1	1
168	2	0	-1	-1	-1	-1	-1	-1	1	1000	0	3	0	0	0	0	1	1
168	2	1	-1	-1	-1	-1	-1	-1	-1	0	0	3	0	0	0	0	1	1
168	2	0	-1	1	-1	-1	-1	-1	-1	2000	0	3	0	0	0	0	1	1
168	2	0	-1	1	1	0	1	0	-1	2000	1	3	0	0	0	0	1	1
168	2	1	-1	-1	-1	-1	-1	-1	-1	0	0	3	0	0	0	0	1	1
169	2	0	1	1	-1	1	0	0	-1	1000	0	3	1	0	1	1	1	1
169	2	0	-1	1	-1	0	0	1	-1	500	1	3	1	0	1	1	1	1
169	2	1	-1	-1	-1	-1	-1	-1	-1	0	0	3	1	0	1	1	1	1
169	2	0	-1	-1	-1	-1	-1	-1	1	1500	0	3	1	0	1	1	1	1
169	2	0	-1	-1	-1	-1	-1	-1	1	1000	1	3	1	0	1	1	1	1
169	2	1	-1	-1	-1	-1	-1	-1	-1	0	0	3	1	0	1	1	1	1
169	2	0	-1	1	-1	-1	-1	-1	-1	2000	0	3	1	0	1	1	1	1
169	2	0	-1	1	1	0	1	0	-1	2000	1	3	1	0	1	1	1	1
169	2	1	-1	-1	-1	-1	-1	-1	-1	0	0	3	1	0	1	1	1	1
170	2	0	1	1	-1	1	0	0	-1	1000	0	3	1	0	1	1	1	1
170	2	0	-1	1	-1	0	0	1	-1	500	1	3	1	0	1	1	1	1
170	2	1	-1	-1	-1	-1	-1	-1	-1	0	0	3	1	0	1	1	1	1
170	2	0	-1	-1	-1	-1	-1	-1	1	1500	0	3	1	0	1	1	1	1
170	2	0	-1	-1	-1	-1	-1	-1	1	1000	1	3	1	0	1	1	1	1
170	2	1	-1	-1	-1	-1	-1	-1	-1	0	0	3	1	0	1	1	1	1
170	2	0	-1	1	-1	-1	-1	-1	-1	2000	0	3	1	0	1	1	1	1
170	2	0	-1	1	1	0	1	0	-1	2000	1	3	1	0	1	1	1	1
170	2	1	-1	-1	-1	-1	-1	-1	-1	0	0	3	1	0	1	1	1	1
171	1	0	-1	1	-1	1	0	0	1	1500	1	3	0	1	0	0	1	1
171	1	0	-1	-1	1	-1	-1	-1	-1	1000	0	3	0	1	0	0	1	1
171	1	1	-1	-1	-1	-1	-1	-1	-1	0	0	3	0	1	0	0	1	1
171	1	0	-1	1	-1	0	1	0	1	500	1	3	0	1	0	0	1	1
171	1	0	1	1	1	-1	-1	-1	1	2000	0	3	0	1	0	0	1	1
171	1	1	-1	-1	-1	-1	-1	-1	-1	0	0	3	0	1	0	0	1	1
171	1	0	1	-1	1	-1	-1	-1	1	500	0	3	0	1	0	0	1	1
171	1	0	-1	-1	-1	-1	-1	-1	1	500	1	3	0	1	0	0	1	1
171	1	1	-1	-1	-1	-1	-1	-1	-1	0	0	3	0	1	0	0	1	1
172	1	0	-1	1	-1	1	0	0	1	1500	0	3	0	0	0	1	1	1
172	1	0	-1	-1	1	-1	-1	-1	-1	1000	1	3	0	0	0	1	1	1
172	1	1	-1	-1	-1	-1	-1	-1	-1	0	0	3	0	0	0	1	1	1
172	1	0	-1	1	-1	0	1	0	1	500	0	3	0	0	0	1	1	1
172	1	0	1	1	1	-1	-1	-1	1	2000	1	3	0	0	0	1	1	1
172	1	1	-1	-1	-1	-1	-1	-1	-1	0	0	3	0	0	0	1	1	1
172	1	0	1	-1	1	-1	-1	-1	1	500	1	3	0	0	0	1	1	1
172	1	0	-1	-1	-1	-1	-1	-1	1	500	0	3	0	0	0	1	1	1
172	1	1	-1	-1	-1	-1	-1	-1	-1	0	0	3	0	0	0	1	1	1
173	1	0	-1	1	-1	1	0	0	1	1500	0	3	0	0	1	1	1	1
173	1	0	-1	-1	1	-1	-1	-1	-1	1000	0	3	0	0	1	1	1	1
173	1	1	-1	-1	-1	-1	-1	-1	-1	0	1	3	0	0	1	1	1	1
173	1	0	-1	1	-1	0	1	0	1	500	0	3	0	0	1	1	1	1
173	1	0	1	1	1	-1	-1	-1	1	2000	0	3	0	0	1	1	1	1
173	1	1	-1	-1	-1	-1	-1	-1	-1	0	1	3	0	0	1	1	1	1
173	1	0	1	-1	1	-1	-1	-1	1	500	0	3	0	0	1	1	1	1
173	1	0	-1	-1	-1	-1	-1	-1	1	500	0	3	0	0	1	1	1	1
173	1	1	-1	-1	-1	-1	-1	-1	-1	0	1	3	0	0	1	1	1	1
174	1	0	-1	1	-1	1	0	0	1	1500	0	3	0	0	0	0	1	1
174	1	0	-1	-1	1	-1	-1	-1	-1	1000	0	3	0	0	0	0	1	1
174	1	1	-1	-1	-1	-1	-1	-1	-1	0	1	3	0	0	0	0	1	1
174	1	0	-1	1	-1	0	1	0	1	500	0	3	0	0	0	0	1	1
174	1	0	1	1	1	-1	-1	-1	1	2000	0	3	0	0	0	0	1	1
174	1	1	-1	-1	-1	-1	-1	-1	-1	0	1	3	0	0	0	0	1	1
174	1	0	1	-1	1	-1	-1	-1	1	500	0	3	0	0	0	0	1	1
174	1	0	-1	-1	-1	-1	-1	-1	1	500	0	3	0	0	0	0	1	1
174	1	1	-1	-1	-1	-1	-1	-1	-1	0	1	3	0	0	0	0	1	1
175	1	0	-1	1	-1	1	0	0	1	1500	0	3	0	0	0	1	1	1
175	1	0	-1	-1	1	-1	-1	-1	-1	1000	0	3	0	0	0	1	1	1
175	1	1	-1	-1	-1	-1	-1	-1	-1	0	1	3	0	0	0	1	1	1
175	1	0	-1	1	-1	0	1	0	1	500	0	3	0	0	0	1	1	1
175	1	0	1	1	1	-1	-1	-1	1	2000	0	3	0	0	0	1	1	1
175	1	1	-1	-1	-1	-1	-1	-1	-1	0	1	3	0	0	0	1	1	1
175	1	0	1	-1	1	-1	-1	-1	1	500	0	3	0	0	0	1	1	1
175	1	0	-1	-1	-1	-1	-1	-1	1	500	0	3	0	0	0	1	1	1
175	1	1	-1	-1	-1	-1	-1	-1	-1	0	1	3	0	0	0	1	1	1
176	2	0	1	1	-1	1	0	0	-1	1000	1	3	0	1	1	1	1	1
176	2	0	-1	1	-1	0	0	1	-1	500	0	3	0	1	1	1	1	1
176	2	1	-1	-1	-1	-1	-1	-1	-1	0	0	3	0	1	1	1	1	1
176	2	0	-1	-1	-1	-1	-1	-1	1	1500	0	3	0	1	1	1	1	1
176	2	0	-1	-1	-1	-1	-1	-1	1	1000	1	3	0	1	1	1	1	1
176	2	1	-1	-1	-1	-1	-1	-1	-1	0	0	3	0	1	1	1	1	1
176	2	0	-1	1	-1	-1	-1	-1	-1	2000	0	3	0	1	1	1	1	1
176	2	0	-1	1	1	0	1	0	-1	2000	1	3	0	1	1	1	1	1
176	2	1	-1	-1	-1	-1	-1	-1	-1	0	0	3	0	1	1	1	1	1
177	2	0	1	1	-1	1	0	0	-1	1000	0	3	1	0	1	0	1	1
177	2	0	-1	1	-1	0	0	1	-1	500	1	3	1	0	1	0	1	1
177	2	1	-1	-1	-1	-1	-1	-1	-1	0	0	3	1	0	1	0	1	1
177	2	0	-1	-1	-1	-1	-1	-1	1	1500	0	3	1	0	1	0	1	1
177	2	0	-1	-1	-1	-1	-1	-1	1	1000	1	3	1	0	1	0	1	1
177	2	1	-1	-1	-1	-1	-1	-1	-1	0	0	3	1	0	1	0	1	1
177	2	0	-1	1	-1	-1	-1	-1	-1	2000	0	3	1	0	1	0	1	1
177	2	0	-1	1	1	0	1	0	-1	2000	1	3	1	0	1	0	1	1
177	2	1	-1	-1	-1	-1	-1	-1	-1	0	0	3	1	0	1	0	1	1
178	1	0	-1	1	-1	1	0	0	1	1500	1	3	1	0	1	1	1	1
178	1	0	-1	-1	1	-1	-1	-1	-1	1000	0	3	1	0	1	1	1	1
178	1	1	-1	-1	-1	-1	-1	-1	-1	0	0	3	1	0	1	1	1	1
178	1	0	-1	1	-1	0	1	0	1	500	0	3	1	0	1	1	1	1
178	1	0	1	1	1	-1	-1	-1	1	2000	1	3	1	0	1	1	1	1
178	1	1	-1	-1	-1	-1	-1	-1	-1	0	0	3	1	0	1	1	1	1
178	1	0	1	-1	1	-1	-1	-1	1	500	1	3	1	0	1	1	1	1
178	1	0	-1	-1	-1	-1	-1	-1	1	500	0	3	1	0	1	1	1	1
178	1	1	-1	-1	-1	-1	-1	-1	-1	0	0	3	1	0	1	1	1	1
179	1	0	-1	1	-1	1	0	0	1	1500	0	3	1	1	0	1	1	1
179	1	0	-1	-1	1	-1	-1	-1	-1	1000	0	3	1	1	0	1	1	1
179	1	1	-1	-1	-1	-1	-1	-1	-1	0	1	3	1	1	0	1	1	1
179	1	0	-1	1	-1	0	1	0	1	500	0	3	1	1	0	1	1	1
179	1	0	1	1	1	-1	-1	-1	1	2000	0	3	1	1	0	1	1	1
179	1	1	-1	-1	-1	-1	-1	-1	-1	0	1	3	1	1	0	1	1	1
179	1	0	1	-1	1	-1	-1	-1	1	500	0	3	1	1	0	1	1	1
179	1	0	-1	-1	-1	-1	-1	-1	1	500	0	3	1	1	0	1	1	1
179	1	1	-1	-1	-1	-1	-1	-1	-1	0	1	3	1	1	0	1	1	1
180	1	0	-1	1	-1	1	0	0	1	1500	0	3	0	0	0	0	1	1
180	1	0	-1	-1	1	-1	-1	-1	-1	1000	0	3	0	0	0	0	1	1
180	1	1	-1	-1	-1	-1	-1	-1	-1	0	1	3	0	0	0	0	1	1
180	1	0	-1	1	-1	0	1	0	1	500	0	3	0	0	0	0	1	1
180	1	0	1	1	1	-1	-1	-1	1	2000	0	3	0	0	0	0	1	1
180	1	1	-1	-1	-1	-1	-1	-1	-1	0	1	3	0	0	0	0	1	1
180	1	0	1	-1	1	-1	-1	-1	1	500	0	3	0	0	0	0	1	1
180	1	0	-1	-1	-1	-1	-1	-1	1	500	0	3	0	0	0	0	1	1
180	1	1	-1	-1	-1	-1	-1	-1	-1	0	1	3	0	0	0	0	1	1
181	1	0	-1	1	-1	1	0	0	1	1500	0	3	0	0	0	0	1	1
181	1	0	-1	-1	1	-1	-1	-1	-1	1000	0	3	0	0	0	0	1	1
181	1	1	-1	-1	-1	-1	-1	-1	-1	0	1	3	0	0	0	0	1	1
181	1	0	-1	1	-1	0	1	0	1	500	0	3	0	0	0	0	1	1
181	1	0	1	1	1	-1	-1	-1	1	2000	0	3	0	0	0	0	1	1
181	1	1	-1	-1	-1	-1	-1	-1	-1	0	1	3	0	0	0	0	1	1
181	1	0	1	-1	1	-1	-1	-1	1	500	0	3	0	0	0	0	1	1
181	1	0	-1	-1	-1	-1	-1	-1	1	500	0	3	0	0	0	0	1	1
181	1	1	-1	-1	-1	-1	-1	-1	-1	0	1	3	0	0	0	0	1	1
182	2	0	1	1	-1	1	0	0	-1	1000	0	3	0	0	0	1	1	1
182	2	0	-1	1	-1	0	0	1	-1	500	0	3	0	0	0	1	1	1
182	2	1	-1	-1	-1	-1	-1	-1	-1	0	1	3	0	0	0	1	1	1
182	2	0	-1	-1	-1	-1	-1	-1	1	1500	0	3	0	0	0	1	1	1
182	2	0	-1	-1	-1	-1	-1	-1	1	1000	0	3	0	0	0	1	1	1
182	2	1	-1	-1	-1	-1	-1	-1	-1	0	1	3	0	0	0	1	1	1
182	2	0	-1	1	-1	-1	-1	-1	-1	2000	0	3	0	0	0	1	1	1
182	2	0	-1	1	1	0	1	0	-1	2000	0	3	0	0	0	1	1	1
182	2	1	-1	-1	-1	-1	-1	-1	-1	0	1	3	0	0	0	1	1	1
183	2	0	1	1	-1	1	0	0	-1	1000	0	3	0	1	1	1	1	1
183	2	0	-1	1	-1	0	0	1	-1	500	0	3	0	1	1	1	1	1
183	2	1	-1	-1	-1	-1	-1	-1	-1	0	1	3	0	1	1	1	1	1
183	2	0	-1	-1	-1	-1	-1	-1	1	1500	0	3	0	1	1	1	1	1
183	2	0	-1	-1	-1	-1	-1	-1	1	1000	0	3	0	1	1	1	1	1
183	2	1	-1	-1	-1	-1	-1	-1	-1	0	1	3	0	1	1	1	1	1
183	2	0	-1	1	-1	-1	-1	-1	-1	2000	0	3	0	1	1	1	1	1
183	2	0	-1	1	1	0	1	0	-1	2000	0	3	0	1	1	1	1	1
183	2	1	-1	-1	-1	-1	-1	-1	-1	0	1	3	0	1	1	1	1	1
184	2	0	1	1	-1	1	0	0	-1	1000	0	3	1	0	1	0	1	1
184	2	0	-1	1	-1	0	0	1	-1	500	0	3	1	0	1	0	1	1
184	2	1	-1	-1	-1	-1	-1	-1	-1	0	1	3	1	0	1	0	1	1
184	2	0	-1	-1	-1	-1	-1	-1	1	1500	0	3	1	0	1	0	1	1
184	2	0	-1	-1	-1	-1	-1	-1	1	1000	0	3	1	0	1	0	1	1
184	2	1	-1	-1	-1	-1	-1	-1	-1	0	1	3	1	0	1	0	1	1
184	2	0	-1	1	-1	-1	-1	-1	-1	2000	0	3	1	0	1	0	1	1
184	2	0	-1	1	1	0	1	0	-1	2000	0	3	1	0	1	0	1	1
184	2	1	-1	-1	-1	-1	-1	-1	-1	0	1	3	1	0	1	0	1	1
185	2	0	1	1	-1	1	0	0	-1	1000	1	3	1	0	0	0	1	1
185	2	0	-1	1	-1	0	0	1	-1	500	0	3	1	0	0	0	1	1
185	2	1	-1	-1	-1	-1	-1	-1	-1	0	0	3	1	0	0	0	1	1
185	2	0	-1	-1	-1	-1	-1	-1	1	1500	1	3	1	0	0	0	1	1
185	2	0	-1	-1	-1	-1	-1	-1	1	1000	0	3	1	0	0	0	1	1
185	2	1	-1	-1	-1	-1	-1	-1	-1	0	0	3	1	0	0	0	1	1
185	2	0	-1	1	-1	-1	-1	-1	-1	2000	0	3	1	0	0	0	1	1
185	2	0	-1	1	1	0	1	0	-1	2000	1	3	1	0	0	0	1	1
185	2	1	-1	-1	-1	-1	-1	-1	-1	0	0	3	1	0	0	0	1	1
186	1	0	-1	1	-1	1	0	0	1	1500	0	3	0	0	1	0	1	1
186	1	0	-1	-1	1	-1	-1	-1	-1	1000	0	3	0	0	1	0	1	1
186	1	1	-1	-1	-1	-1	-1	-1	-1	0	1	3	0	0	1	0	1	1
186	1	0	-1	1	-1	0	1	0	1	500	0	3	0	0	1	0	1	1
186	1	0	1	1	1	-1	-1	-1	1	2000	0	3	0	0	1	0	1	1
186	1	1	-1	-1	-1	-1	-1	-1	-1	0	1	3	0	0	1	0	1	1
186	1	0	1	-1	1	-1	-1	-1	1	500	0	3	0	0	1	0	1	1
186	1	0	-1	-1	-1	-1	-1	-1	1	500	0	3	0	0	1	0	1	1
186	1	1	-1	-1	-1	-1	-1	-1	-1	0	1	3	0	0	1	0	1	1
187	2	0	1	1	-1	1	0	0	-1	1000	0	3	0	1	0	1	0	1
187	2	0	-1	1	-1	0	0	1	-1	500	0	3	0	1	0	1	0	1
187	2	1	-1	-1	-1	-1	-1	-1	-1	0	1	3	0	1	0	1	0	1
187	2	0	-1	-1	-1	-1	-1	-1	1	1500	0	3	0	1	0	1	0	1
187	2	0	-1	-1	-1	-1	-1	-1	1	1000	0	3	0	1	0	1	0	1
187	2	1	-1	-1	-1	-1	-1	-1	-1	0	1	3	0	1	0	1	0	1
187	2	0	-1	1	-1	-1	-1	-1	-1	2000	0	3	0	1	0	1	0	1
187	2	0	-1	1	1	0	1	0	-1	2000	0	3	0	1	0	1	0	1
187	2	1	-1	-1	-1	-1	-1	-1	-1	0	1	3	0	1	0	1	0	1
188	2	0	1	1	-1	1	0	0	-1	1000	0	3	0	0	1	1	0	1
188	2	0	-1	1	-1	0	0	1	-1	500	0	3	0	0	1	1	0	1
188	2	1	-1	-1	-1	-1	-1	-1	-1	0	1	3	0	0	1	1	0	1
188	2	0	-1	-1	-1	-1	-1	-1	1	1500	0	3	0	0	1	1	0	1
188	2	0	-1	-1	-1	-1	-1	-1	1	1000	0	3	0	0	1	1	0	1
188	2	1	-1	-1	-1	-1	-1	-1	-1	0	1	3	0	0	1	1	0	1
188	2	0	-1	1	-1	-1	-1	-1	-1	2000	0	3	0	0	1	1	0	1
188	2	0	-1	1	1	0	1	0	-1	2000	0	3	0	0	1	1	0	1
188	2	1	-1	-1	-1	-1	-1	-1	-1	0	1	3	0	0	1	1	0	1
189	1	0	-1	1	-1	1	0	0	1	1500	0	3	0	0	0	1	1	1
189	1	0	-1	-1	1	-1	-1	-1	-1	1000	0	3	0	0	0	1	1	1
189	1	1	-1	-1	-1	-1	-1	-1	-1	0	1	3	0	0	0	1	1	1
189	1	0	-1	1	-1	0	1	0	1	500	0	3	0	0	0	1	1	1
189	1	0	1	1	1	-1	-1	-1	1	2000	0	3	0	0	0	1	1	1
189	1	1	-1	-1	-1	-1	-1	-1	-1	0	1	3	0	0	0	1	1	1
189	1	0	1	-1	1	-1	-1	-1	1	500	0	3	0	0	0	1	1	1
189	1	0	-1	-1	-1	-1	-1	-1	1	500	0	3	0	0	0	1	1	1
189	1	1	-1	-1	-1	-1	-1	-1	-1	0	1	3	0	0	0	1	1	1
190	2	0	1	1	-1	1	0	0	-1	1000	0	3	0	1	0	0	1	1
190	2	0	-1	1	-1	0	0	1	-1	500	0	3	0	1	0	0	1	1
190	2	1	-1	-1	-1	-1	-1	-1	-1	0	1	3	0	1	0	0	1	1
190	2	0	-1	-1	-1	-1	-1	-1	1	1500	0	3	0	1	0	0	1	1
190	2	0	-1	-1	-1	-1	-1	-1	1	1000	0	3	0	1	0	0	1	1
190	2	1	-1	-1	-1	-1	-1	-1	-1	0	1	3	0	1	0	0	1	1
190	2	0	-1	1	-1	-1	-1	-1	-1	2000	0	3	0	1	0	0	1	1
190	2	0	-1	1	1	0	1	0	-1	2000	0	3	0	1	0	0	1	1
190	2	1	-1	-1	-1	-1	-1	-1	-1	0	1	3	0	1	0	0	1	1
191	2	0	1	1	-1	1	0	0	-1	1000	1	3	0	0	0	1	1	1
191	2	0	-1	1	-1	0	0	1	-1	500	0	3	0	0	0	1	1	1
191	2	1	-1	-1	-1	-1	-1	-1	-1	0	0	3	0	0	0	1	1	1
191	2	0	-1	-1	-1	-1	-1	-1	1	1500	1	3	0	0	0	1	1	1
191	2	0	-1	-1	-1	-1	-1	-1	1	1000	0	3	0	0	0	1	1	1
191	2	1	-1	-1	-1	-1	-1	-1	-1	0	0	3	0	0	0	1	1	1
191	2	0	-1	1	-1	-1	-1	-1	-1	2000	0	3	0	0	0	1	1	1
191	2	0	-1	1	1	0	1	0	-1	2000	1	3	0	0	0	1	1	1
191	2	1	-1	-1	-1	-1	-1	-1	-1	0	0	3	0	0	0	1	1	1
192	2	0	1	1	-1	1	0	0	-1	1000	0	3	1	0	0	0	1	1
192	2	0	-1	1	-1	0	0	1	-1	500	1	3	1	0	0	0	1	1
192	2	1	-1	-1	-1	-1	-1	-1	-1	0	0	3	1	0	0	0	1	1
192	2	0	-1	-1	-1	-1	-1	-1	1	1500	0	3	1	0	0	0	1	1
192	2	0	-1	-1	-1	-1	-1	-1	1	1000	0	3	1	0	0	0	1	1
192	2	1	-1	-1	-1	-1	-1	-1	-1	0	1	3	1	0	0	0	1	1
192	2	0	-1	1	-1	-1	-1	-1	-1	2000	0	3	1	0	0	0	1	1
192	2	0	-1	1	1	0	1	0	-1	2000	0	3	1	0	0	0	1	1
192	2	1	-1	-1	-1	-1	-1	-1	-1	0	1	3	1	0	0	0	1	1
193	1	0	-1	1	-1	1	0	0	1	1500	0	3	0	1	0	1	1	1
193	1	0	-1	-1	1	-1	-1	-1	-1	1000	0	3	0	1	0	1	1	1
193	1	1	-1	-1	-1	-1	-1	-1	-1	0	1	3	0	1	0	1	1	1
193	1	0	-1	1	-1	0	1	0	1	500	0	3	0	1	0	1	1	1
193	1	0	1	1	1	-1	-1	-1	1	2000	0	3	0	1	0	1	1	1
193	1	1	-1	-1	-1	-1	-1	-1	-1	0	1	3	0	1	0	1	1	1
193	1	0	1	-1	1	-1	-1	-1	1	500	0	3	0	1	0	1	1	1
193	1	0	-1	-1	-1	-1	-1	-1	1	500	0	3	0	1	0	1	1	1
193	1	1	-1	-1	-1	-1	-1	-1	-1	0	1	3	0	1	0	1	1	1
194	1	0	-1	1	-1	1	0	0	1	1500	0	3	0	1	0	1	1	1
194	1	0	-1	-1	1	-1	-1	-1	-1	1000	1	3	0	1	0	1	1	1
194	1	1	-1	-1	-1	-1	-1	-1	-1	0	0	3	0	1	0	1	1	1
194	1	0	-1	1	-1	0	1	0	1	500	1	3	0	1	0	1	1	1
194	1	0	1	1	1	-1	-1	-1	1	2000	0	3	0	1	0	1	1	1
194	1	1	-1	-1	-1	-1	-1	-1	-1	0	0	3	0	1	0	1	1	1
194	1	0	1	-1	1	-1	-1	-1	1	500	0	3	0	1	0	1	1	1
194	1	0	-1	-1	-1	-1	-1	-1	1	500	1	3	0	1	0	1	1	1
194	1	1	-1	-1	-1	-1	-1	-1	-1	0	0	3	0	1	0	1	1	1
195	1	0	-1	1	-1	1	0	0	1	1500	0	3	0	1	1	1	1	1
195	1	0	-1	-1	1	-1	-1	-1	-1	1000	0	3	0	1	1	1	1	1
195	1	1	-1	-1	-1	-1	-1	-1	-1	0	1	3	0	1	1	1	1	1
195	1	0	-1	1	-1	0	1	0	1	500	0	3	0	1	1	1	1	1
195	1	0	1	1	1	-1	-1	-1	1	2000	0	3	0	1	1	1	1	1
195	1	1	-1	-1	-1	-1	-1	-1	-1	0	1	3	0	1	1	1	1	1
195	1	0	1	-1	1	-1	-1	-1	1	500	0	3	0	1	1	1	1	1
195	1	0	-1	-1	-1	-1	-1	-1	1	500	0	3	0	1	1	1	1	1
195	1	1	-1	-1	-1	-1	-1	-1	-1	0	1	3	0	1	1	1	1	1
196	1	0	-1	1	-1	1	0	0	1	1500	0	3	0	1	1	1	1	1
196	1	0	-1	-1	1	-1	-1	-1	-1	1000	0	3	0	1	1	1	1	1
196	1	1	-1	-1	-1	-1	-1	-1	-1	0	1	3	0	1	1	1	1	1
196	1	0	-1	1	-1	0	1	0	1	500	0	3	0	1	1	1	1	1
196	1	0	1	1	1	-1	-1	-1	1	2000	0	3	0	1	1	1	1	1
196	1	1	-1	-1	-1	-1	-1	-1	-1	0	1	3	0	1	1	1	1	1
196	1	0	1	-1	1	-1	-1	-1	1	500	0	3	0	1	1	1	1	1
196	1	0	-1	-1	-1	-1	-1	-1	1	500	0	3	0	1	1	1	1	1
196	1	1	-1	-1	-1	-1	-1	-1	-1	0	1	3	0	1	1	1	1	1
197	1	0	-1	1	-1	1	0	0	1	1500	0	3	0	1	0	1	1	1
197	1	0	-1	-1	1	-1	-1	-1	-1	1000	0	3	0	1	0	1	1	1
197	1	1	-1	-1	-1	-1	-1	-1	-1	0	1	3	0	1	0	1	1	1
197	1	0	-1	1	-1	0	1	0	1	500	1	3	0	1	0	1	1	1
197	1	0	1	1	1	-1	-1	-1	1	2000	0	3	0	1	0	1	1	1
197	1	1	-1	-1	-1	-1	-1	-1	-1	0	0	3	0	1	0	1	1	1
197	1	0	1	-1	1	-1	-1	-1	1	500	1	3	0	1	0	1	1	1
197	1	0	-1	-1	-1	-1	-1	-1	1	500	0	3	0	1	0	1	1	1
197	1	1	-1	-1	-1	-1	-1	-1	-1	0	0	3	0	1	0	1	1	1
198	1	0	-1	1	-1	1	0	0	1	1500	0	3	0	1	0	1	0	1
198	1	0	-1	-1	1	-1	-1	-1	-1	1000	0	3	0	1	0	1	0	1
198	1	1	-1	-1	-1	-1	-1	-1	-1	0	1	3	0	1	0	1	0	1
198	1	0	-1	1	-1	0	1	0	1	500	0	3	0	1	0	1	0	1
198	1	0	1	1	1	-1	-1	-1	1	2000	0	3	0	1	0	1	0	1
198	1	1	-1	-1	-1	-1	-1	-1	-1	0	1	3	0	1	0	1	0	1
198	1	0	1	-1	1	-1	-1	-1	1	500	0	3	0	1	0	1	0	1
198	1	0	-1	-1	-1	-1	-1	-1	1	500	0	3	0	1	0	1	0	1
198	1	1	-1	-1	-1	-1	-1	-1	-1	0	1	3	0	1	0	1	0	1
199	1	0	-1	1	-1	1	0	0	1	1500	0	3	0	0	0	1	1	1
199	1	0	-1	-1	1	-1	-1	-1	-1	1000	0	3	0	0	0	1	1	1
199	1	1	-1	-1	-1	-1	-1	-1	-1	0	1	3	0	0	0	1	1	1
199	1	0	-1	1	-1	0	1	0	1	500	0	3	0	0	0	1	1	1
199	1	0	1	1	1	-1	-1	-1	1	2000	0	3	0	0	0	1	1	1
199	1	1	-1	-1	-1	-1	-1	-1	-1	0	1	3	0	0	0	1	1	1
199	1	0	1	-1	1	-1	-1	-1	1	500	0	3	0	0	0	1	1	1
199	1	0	-1	-1	-1	-1	-1	-1	1	500	0	3	0	0	0	1	1	1
199	1	1	-1	-1	-1	-1	-1	-1	-1	0	1	3	0	0	0	1	1	1
200	1	0	-1	1	-1	1	0	0	1	1500	0	3	0	1	1	1	1	1
200	1	0	-1	-1	1	-1	-1	-1	-1	1000	1	3	0	1	1	1	1	1
200	1	1	-1	-1	-1	-1	-1	-1	-1	0	0	3	0	1	1	1	1	1
200	1	0	-1	1	-1	0	1	0	1	500	1	3	0	1	1	1	1	1
200	1	0	1	1	1	-1	-1	-1	1	2000	0	3	0	1	1	1	1	1
200	1	1	-1	-1	-1	-1	-1	-1	-1	0	0	3	0	1	1	1	1	1
200	1	0	1	-1	1	-1	-1	-1	1	500	1	3	0	1	1	1	1	1
200	1	0	-1	-1	-1	-1	-1	-1	1	500	0	3	0	1	1	1	1	1
200	1	1	-1	-1	-1	-1	-1	-1	-1	0	0	3	0	1	1	1	1	1
201	1	0	-1	1	-1	1	0	0	1	1500	0	3	0	1	0	0	1	1
201	1	0	-1	-1	1	-1	-1	-1	-1	1000	1	3	0	1	0	0	1	1
201	1	1	-1	-1	-1	-1	-1	-1	-1	0	0	3	0	1	0	0	1	1
201	1	0	-1	1	-1	0	1	0	1	500	1	3	0	1	0	0	1	1
201	1	0	1	1	1	-1	-1	-1	1	2000	0	3	0	1	0	0	1	1
201	1	1	-1	-1	-1	-1	-1	-1	-1	0	0	3	0	1	0	0	1	1
201	1	0	1	-1	1	-1	-1	-1	1	500	1	3	0	1	0	0	1	1
201	1	0	-1	-1	-1	-1	-1	-1	1	500	0	3	0	1	0	0	1	1
201	1	1	-1	-1	-1	-1	-1	-1	-1	0	0	3	0	1	0	0	1	1
202	1	0	-1	1	-1	1	0	0	1	1500	0	3	0	1	0	0	1	1
202	1	0	-1	-1	1	-1	-1	-1	-1	1000	1	3	0	1	0	0	1	1
202	1	1	-1	-1	-1	-1	-1	-1	-1	0	0	3	0	1	0	0	1	1
202	1	0	-1	1	-1	0	1	0	1	500	1	3	0	1	0	0	1	1
202	1	0	1	1	1	-1	-1	-1	1	2000	0	3	0	1	0	0	1	1
202	1	1	-1	-1	-1	-1	-1	-1	-1	0	0	3	0	1	0	0	1	1
202	1	0	1	-1	1	-1	-1	-1	1	500	0	3	0	1	0	0	1	1
202	1	0	-1	-1	-1	-1	-1	-1	1	500	1	3	0	1	0	0	1	1
202	1	1	-1	-1	-1	-1	-1	-1	-1	0	0	3	0	1	0	0	1	1
203	1	0	-1	1	-1	1	0	0	1	1500	1	3	1	0	0	1	1	1
203	1	0	-1	-1	1	-1	-1	-1	-1	1000	0	3	1	0	0	1	1	1
203	1	1	-1	-1	-1	-1	-1	-1	-1	0	0	3	1	0	0	1	1	1
203	1	0	-1	1	-1	0	1	0	1	500	1	3	1	0	0	1	1	1
203	1	0	1	1	1	-1	-1	-1	1	2000	0	3	1	0	0	1	1	1
203	1	1	-1	-1	-1	-1	-1	-1	-1	0	0	3	1	0	0	1	1	1
203	1	0	1	-1	1	-1	-1	-1	1	500	1	3	1	0	0	1	1	1
203	1	0	-1	-1	-1	-1	-1	-1	1	500	0	3	1	0	0	1	1	1
203	1	1	-1	-1	-1	-1	-1	-1	-1	0	0	3	1	0	0	1	1	1
204	2	0	1	1	-1	1	0	0	-1	1000	0	3	0	0	0	0	1	1
204	2	0	-1	1	-1	0	0	1	-1	500	0	3	0	0	0	0	1	1
204	2	1	-1	-1	-1	-1	-1	-1	-1	0	1	3	0	0	0	0	1	1
204	2	0	-1	-1	-1	-1	-1	-1	1	1500	0	3	0	0	0	0	1	1
204	2	0	-1	-1	-1	-1	-1	-1	1	1000	0	3	0	0	0	0	1	1
204	2	1	-1	-1	-1	-1	-1	-1	-1	0	1	3	0	0	0	0	1	1
204	2	0	-1	1	-1	-1	-1	-1	-1	2000	0	3	0	0	0	0	1	1
204	2	0	-1	1	1	0	1	0	-1	2000	0	3	0	0	0	0	1	1
204	2	1	-1	-1	-1	-1	-1	-1	-1	0	1	3	0	0	0	0	1	1
205	2	0	1	1	-1	1	0	0	-1	1000	0	3	0	0	0	1	0	1
205	2	0	-1	1	-1	0	0	1	-1	500	1	3	0	0	0	1	0	1
205	2	1	-1	-1	-1	-1	-1	-1	-1	0	0	3	0	0	0	1	0	1
205	2	0	-1	-1	-1	-1	-1	-1	1	1500	0	3	0	0	0	1	0	1
205	2	0	-1	-1	-1	-1	-1	-1	1	1000	1	3	0	0	0	1	0	1
205	2	1	-1	-1	-1	-1	-1	-1	-1	0	0	3	0	0	0	1	0	1
205	2	0	-1	1	-1	-1	-1	-1	-1	2000	0	3	0	0	0	1	0	1
205	2	0	-1	1	1	0	1	0	-1	2000	1	3	0	0	0	1	0	1
205	2	1	-1	-1	-1	-1	-1	-1	-1	0	0	3	0	0	0	1	0	1
206	2	0	1	1	-1	1	0	0	-1	1000	0	3	0	0	0	0	1	1
206	2	0	-1	1	-1	0	0	1	-1	500	0	3	0	0	0	0	1	1
206	2	1	-1	-1	-1	-1	-1	-1	-1	0	1	3	0	0	0	0	1	1
206	2	0	-1	-1	-1	-1	-1	-1	1	1500	0	3	0	0	0	0	1	1
206	2	0	-1	-1	-1	-1	-1	-1	1	1000	0	3	0	0	0	0	1	1
206	2	1	-1	-1	-1	-1	-1	-1	-1	0	1	3	0	0	0	0	1	1
206	2	0	-1	1	-1	-1	-1	-1	-1	2000	0	3	0	0	0	0	1	1
206	2	0	-1	1	1	0	1	0	-1	2000	0	3	0	0	0	0	1	1
206	2	1	-1	-1	-1	-1	-1	-1	-1	0	1	3	0	0	0	0	1	1
207	2	0	1	1	-1	1	0	0	-1	1000	0	3	0	0	0	1	0	1
207	2	0	-1	1	-1	0	0	1	-1	500	0	3	0	0	0	1	0	1
207	2	1	-1	-1	-1	-1	-1	-1	-1	0	1	3	0	0	0	1	0	1
207	2	0	-1	-1	-1	-1	-1	-1	1	1500	0	3	0	0	0	1	0	1
207	2	0	-1	-1	-1	-1	-1	-1	1	1000	0	3	0	0	0	1	0	1
207	2	1	-1	-1	-1	-1	-1	-1	-1	0	1	3	0	0	0	1	0	1
207	2	0	-1	1	-1	-1	-1	-1	-1	2000	0	3	0	0	0	1	0	1
207	2	0	-1	1	1	0	1	0	-1	2000	0	3	0	0	0	1	0	1
207	2	1	-1	-1	-1	-1	-1	-1	-1	0	1	3	0	0	0	1	0	1
208	2	0	1	1	-1	1	0	0	-1	1000	0	3	0	0	0	0	1	1
208	2	0	-1	1	-1	0	0	1	-1	500	1	3	0	0	0	0	1	1
208	2	1	-1	-1	-1	-1	-1	-1	-1	0	0	3	0	0	0	0	1	1
208	2	0	-1	-1	-1	-1	-1	-1	1	1500	0	3	0	0	0	0	1	1
208	2	0	-1	-1	-1	-1	-1	-1	1	1000	1	3	0	0	0	0	1	1
208	2	1	-1	-1	-1	-1	-1	-1	-1	0	0	3	0	0	0	0	1	1
208	2	0	-1	1	-1	-1	-1	-1	-1	2000	0	3	0	0	0	0	1	1
208	2	0	-1	1	1	0	1	0	-1	2000	1	3	0	0	0	0	1	1
208	2	1	-1	-1	-1	-1	-1	-1	-1	0	0	3	0	0	0	0	1	1
209	2	0	1	1	-1	1	0	0	-1	1000	0	3	0	1	1	0	1	1
209	2	0	-1	1	-1	0	0	1	-1	500	0	3	0	1	1	0	1	1
209	2	1	-1	-1	-1	-1	-1	-1	-1	0	1	3	0	1	1	0	1	1
209	2	0	-1	-1	-1	-1	-1	-1	1	1500	0	3	0	1	1	0	1	1
209	2	0	-1	-1	-1	-1	-1	-1	1	1000	0	3	0	1	1	0	1	1
209	2	1	-1	-1	-1	-1	-1	-1	-1	0	1	3	0	1	1	0	1	1
209	2	0	-1	1	-1	-1	-1	-1	-1	2000	0	3	0	1	1	0	1	1
209	2	0	-1	1	1	0	1	0	-1	2000	0	3	0	1	1	0	1	1
209	2	1	-1	-1	-1	-1	-1	-1	-1	0	1	3	0	1	1	0	1	1
210	1	0	-1	1	-1	1	0	0	1	1500	0	3	1	0	0	1	1	1
210	1	0	-1	-1	1	-1	-1	-1	-1	1000	1	3	1	0	0	1	1	1
210	1	1	-1	-1	-1	-1	-1	-1	-1	0	0	3	1	0	0	1	1	1
210	1	0	-1	1	-1	0	1	0	1	500	0	3	1	0	0	1	1	1
210	1	0	1	1	1	-1	-1	-1	1	2000	0	3	1	0	0	1	1	1
210	1	1	-1	-1	-1	-1	-1	-1	-1	0	1	3	1	0	0	1	1	1
210	1	0	1	-1	1	-1	-1	-1	1	500	0	3	1	0	0	1	1	1
210	1	0	-1	-1	-1	-1	-1	-1	1	500	0	3	1	0	0	1	1	1
210	1	1	-1	-1	-1	-1	-1	-1	-1	0	1	3	1	0	0	1	1	1
211	1	0	-1	1	-1	1	0	0	1	1500	0	3	1	1	0	0	1	1
211	1	0	-1	-1	1	-1	-1	-1	-1	1000	0	3	1	1	0	0	1	1
211	1	1	-1	-1	-1	-1	-1	-1	-1	0	1	3	1	1	0	0	1	1
211	1	0	-1	1	-1	0	1	0	1	500	0	3	1	1	0	0	1	1
211	1	0	1	1	1	-1	-1	-1	1	2000	0	3	1	1	0	0	1	1
211	1	1	-1	-1	-1	-1	-1	-1	-1	0	1	3	1	1	0	0	1	1
211	1	0	1	-1	1	-1	-1	-1	1	500	0	3	1	1	0	0	1	1
211	1	0	-1	-1	-1	-1	-1	-1	1	500	0	3	1	1	0	0	1	1
211	1	1	-1	-1	-1	-1	-1	-1	-1	0	1	3	1	1	0	0	1	1
212	1	0	-1	1	-1	1	0	0	1	1500	0	3	1	0	0	0	1	1
212	1	0	-1	-1	1	-1	-1	-1	-1	1000	0	3	1	0	0	0	1	1
212	1	1	-1	-1	-1	-1	-1	-1	-1	0	1	3	1	0	0	0	1	1
212	1	0	-1	1	-1	0	1	0	1	500	0	3	1	0	0	0	1	1
212	1	0	1	1	1	-1	-1	-1	1	2000	0	3	1	0	0	0	1	1
212	1	1	-1	-1	-1	-1	-1	-1	-1	0	1	3	1	0	0	0	1	1
212	1	0	1	-1	1	-1	-1	-1	1	500	0	3	1	0	0	0	1	1
212	1	0	-1	-1	-1	-1	-1	-1	1	500	0	3	1	0	0	0	1	1
212	1	1	-1	-1	-1	-1	-1	-1	-1	0	1	3	1	0	0	0	1	1
213	1	0	-1	1	-1	1	0	0	1	1500	0	3	1	1	1	1	1	1
213	1	0	-1	-1	1	-1	-1	-1	-1	1000	1	3	1	1	1	1	1	1
213	1	1	-1	-1	-1	-1	-1	-1	-1	0	0	3	1	1	1	1	1	1
213	1	0	-1	1	-1	0	1	0	1	500	1	3	1	1	1	1	1	1
213	1	0	1	1	1	-1	-1	-1	1	2000	0	3	1	1	1	1	1	1
213	1	1	-1	-1	-1	-1	-1	-1	-1	0	0	3	1	1	1	1	1	1
213	1	0	1	-1	1	-1	-1	-1	1	500	1	3	1	1	1	1	1	1
213	1	0	-1	-1	-1	-1	-1	-1	1	500	0	3	1	1	1	1	1	1
213	1	1	-1	-1	-1	-1	-1	-1	-1	0	0	3	1	1	1	1	1	1
214	1	0	-1	1	-1	1	0	0	1	1500	0	3	0	1	1	0	1	1
214	1	0	-1	-1	1	-1	-1	-1	-1	1000	1	3	0	1	1	0	1	1
214	1	1	-1	-1	-1	-1	-1	-1	-1	0	0	3	0	1	1	0	1	1
214	1	0	-1	1	-1	0	1	0	1	500	0	3	0	1	1	0	1	1
214	1	0	1	1	1	-1	-1	-1	1	2000	0	3	0	1	1	0	1	1
214	1	1	-1	-1	-1	-1	-1	-1	-1	0	1	3	0	1	1	0	1	1
214	1	0	1	-1	1	-1	-1	-1	1	500	0	3	0	1	1	0	1	1
214	1	0	-1	-1	-1	-1	-1	-1	1	500	0	3	0	1	1	0	1	1
214	1	1	-1	-1	-1	-1	-1	-1	-1	0	1	3	0	1	1	0	1	1
215	1	0	-1	1	-1	1	0	0	1	1500	0	3	0	0	0	1	1	1
215	1	0	-1	-1	1	-1	-1	-1	-1	1000	0	3	0	0	0	1	1	1
215	1	1	-1	-1	-1	-1	-1	-1	-1	0	1	3	0	0	0	1	1	1
215	1	0	-1	1	-1	0	1	0	1	500	0	3	0	0	0	1	1	1
215	1	0	1	1	1	-1	-1	-1	1	2000	0	3	0	0	0	1	1	1
215	1	1	-1	-1	-1	-1	-1	-1	-1	0	1	3	0	0	0	1	1	1
215	1	0	1	-1	1	-1	-1	-1	1	500	0	3	0	0	0	1	1	1
215	1	0	-1	-1	-1	-1	-1	-1	1	500	0	3	0	0	0	1	1	1
215	1	1	-1	-1	-1	-1	-1	-1	-1	0	1	3	0	0	0	1	1	1
216	2	0	1	1	-1	1	0	0	-1	1000	0	3	0	1	0	0	1	1
216	2	0	-1	1	-1	0	0	1	-1	500	0	3	0	1	0	0	1	1
216	2	1	-1	-1	-1	-1	-1	-1	-1	0	1	3	0	1	0	0	1	1
216	2	0	-1	-1	-1	-1	-1	-1	1	1500	0	3	0	1	0	0	1	1
216	2	0	-1	-1	-1	-1	-1	-1	1	1000	0	3	0	1	0	0	1	1
216	2	1	-1	-1	-1	-1	-1	-1	-1	0	1	3	0	1	0	0	1	1
216	2	0	-1	1	-1	-1	-1	-1	-1	2000	0	3	0	1	0	0	1	1
216	2	0	-1	1	1	0	1	0	-1	2000	0	3	0	1	0	0	1	1
216	2	1	-1	-1	-1	-1	-1	-1	-1	0	1	3	0	1	0	0	1	1
217	1	0	-1	1	-1	1	0	0	1	1500	0	3	0	0	0	0	1	1
217	1	0	-1	-1	1	-1	-1	-1	-1	1000	0	3	0	0	0	0	1	1
217	1	1	-1	-1	-1	-1	-1	-1	-1	0	1	3	0	0	0	0	1	1
217	1	0	-1	1	-1	0	1	0	1	500	0	3	0	0	0	0	1	1
217	1	0	1	1	1	-1	-1	-1	1	2000	0	3	0	0	0	0	1	1
217	1	1	-1	-1	-1	-1	-1	-1	-1	0	1	3	0	0	0	0	1	1
217	1	0	1	-1	1	-1	-1	-1	1	500	0	3	0	0	0	0	1	1
217	1	0	-1	-1	-1	-1	-1	-1	1	500	0	3	0	0	0	0	1	1
217	1	1	-1	-1	-1	-1	-1	-1	-1	0	1	3	0	0	0	0	1	1
218	1	0	-1	1	-1	1	0	0	1	1500	0	3	0	0	1	0	1	1
218	1	0	-1	-1	1	-1	-1	-1	-1	1000	0	3	0	0	1	0	1	1
218	1	1	-1	-1	-1	-1	-1	-1	-1	0	1	3	0	0	1	0	1	1
218	1	0	-1	1	-1	0	1	0	1	500	0	3	0	0	1	0	1	1
218	1	0	1	1	1	-1	-1	-1	1	2000	0	3	0	0	1	0	1	1
218	1	1	-1	-1	-1	-1	-1	-1	-1	0	1	3	0	0	1	0	1	1
218	1	0	1	-1	1	-1	-1	-1	1	500	0	3	0	0	1	0	1	1
218	1	0	-1	-1	-1	-1	-1	-1	1	500	0	3	0	0	1	0	1	1
218	1	1	-1	-1	-1	-1	-1	-1	-1	0	1	3	0	0	1	0	1	1
219	2	0	1	1	-1	1	0	0	-1	1000	0	3	0	0	0	1	0	0
219	2	0	-1	1	-1	0	0	1	-1	500	1	3	0	0	0	1	0	0
219	2	1	-1	-1	-1	-1	-1	-1	-1	0	0	3	0	0	0	1	0	0
219	2	0	-1	-1	-1	-1	-1	-1	1	1500	0	3	0	0	0	1	0	0
219	2	0	-1	-1	-1	-1	-1	-1	1	1000	1	3	0	0	0	1	0	0
219	2	1	-1	-1	-1	-1	-1	-1	-1	0	0	3	0	0	0	1	0	0
219	2	0	-1	1	-1	-1	-1	-1	-1	2000	0	3	0	0	0	1	0	0
219	2	0	-1	1	1	0	1	0	-1	2000	0	3	0	0	0	1	0	0
219	2	1	-1	-1	-1	-1	-1	-1	-1	0	1	3	0	0	0	1	0	0
220	2	0	1	1	-1	1	0	0	-1	1000	0	3	0	0	1	1	1	0
220	2	0	-1	1	-1	0	0	1	-1	500	0	3	0	0	1	1	1	0
220	2	1	-1	-1	-1	-1	-1	-1	-1	0	1	3	0	0	1	1	1	0
220	2	0	-1	-1	-1	-1	-1	-1	1	1500	0	3	0	0	1	1	1	0
220	2	0	-1	-1	-1	-1	-1	-1	1	1000	0	3	0	0	1	1	1	0
220	2	1	-1	-1	-1	-1	-1	-1	-1	0	1	3	0	0	1	1	1	0
220	2	0	-1	1	-1	-1	-1	-1	-1	2000	0	3	0	0	1	1	1	0
220	2	0	-1	1	1	0	1	0	-1	2000	0	3	0	0	1	1	1	0
220	2	1	-1	-1	-1	-1	-1	-1	-1	0	1	3	0	0	1	1	1	0
221	1	0	-1	1	-1	1	0	0	1	1500	0	3	0	1	0	1	1	0
221	1	0	-1	-1	1	-1	-1	-1	-1	1000	1	3	0	1	0	1	1	0
221	1	1	-1	-1	-1	-1	-1	-1	-1	0	0	3	0	1	0	1	1	0
221	1	0	-1	1	-1	0	1	0	1	500	1	3	0	1	0	1	1	0
221	1	0	1	1	1	-1	-1	-1	1	2000	0	3	0	1	0	1	1	0
221	1	1	-1	-1	-1	-1	-1	-1	-1	0	0	3	0	1	0	1	1	0
221	1	0	1	-1	1	-1	-1	-1	1	500	1	3	0	1	0	1	1	0
221	1	0	-1	-1	-1	-1	-1	-1	1	500	0	3	0	1	0	1	1	0
221	1	1	-1	-1	-1	-1	-1	-1	-1	0	0	3	0	1	0	1	1	0
222	2	0	1	1	-1	1	0	0	-1	1000	0	3	0	0	0	1	1	0
222	2	0	-1	1	-1	0	0	1	-1	500	1	3	0	0	0	1	1	0
222	2	1	-1	-1	-1	-1	-1	-1	-1	0	0	3	0	0	0	1	1	0
222	2	0	-1	-1	-1	-1	-1	-1	1	1500	0	3	0	0	0	1	1	0
222	2	0	-1	-1	-1	-1	-1	-1	1	1000	1	3	0	0	0	1	1	0
222	2	1	-1	-1	-1	-1	-1	-1	-1	0	0	3	0	0	0	1	1	0
222	2	0	-1	1	-1	-1	-1	-1	-1	2000	0	3	0	0	0	1	1	0
222	2	0	-1	1	1	0	1	0	-1	2000	0	3	0	0	0	1	1	0
222	2	1	-1	-1	-1	-1	-1	-1	-1	0	1	3	0	0	0	1	1	0
223	2	0	1	1	-1	1	0	0	-1	1000	0	3	0	1	1	1	1	0
[truncated: 3,905 more rows]

## Sheet: Variable Definition
Variable Name	Note	Definition
OBS	Number of Respondents	-
TYPE	CE questionnaire type	-
ASC		ASC=1 if this choice set is "Status quo", otherwise ASC=0
FA	Agricultural Farming Type	FA = 1 if this attributes' level in choice set is "Increase organic farming area", otherwise FA = -1
BI	Biodiversity	BI = 1 if this attributes' level in choice set is "Increase in populations of species", otherwise BI = -1
WA	Water Provision	WA = 1 if this attributes' level in choice set is "Increase in populations of species", otherwise WA = -1
LU1	Land Use Type 1	LU1 = 1 if this attributes' level in choice set is "Increase natural forestry area", LU1 = -1 if this attributes' level in choice set is "Status quo" , otherwise LU1 = 0
LU2	Land Use Type 2	LU2 = 1 if this attributes' level in choice set is "Increase ethnobotany area", LU2 = -1 if this attributes' level in choice set is "Status quo" , otherwise LU2 = 0
LU3	Land Use Type 3	LU3 = 1 if this attributes' level in choice set is "Increase wetland area", LU3 = -1 if this attributes' level in choice set is "Status quo" , otherwise LU3 = 0
EC	Ecotourism Mode	EC = 1 if this attributes' level in choice set is "Integrated framework for the ecotourism", otherwise EC = -1
FUND	Environmental Trust Fund	FUND = 0 if this attributes' level in choice set is "no payment", FUND = 500 if this attributes' level in choice set is "NT$500/year/person", FUND = 1000 if this attributes' level in choice set is "NT$1000/year/person", FUND = 1500 if this attributes' level in choice set is "NT$1500/year/person", FUND = 2000 if this attributes' level in choice set is "NT$2000/year/person"
CHOICE		CHOICE = 1 if the respondent chooses this choice set, otherwise CHOICE = 0
TI	The number of choice sets for choose	-
INCOME	Monthly income	INCOME = 1 if monthly income > NT$20,000, otherwise INCOME = 0
LIVE	Lived years	LIVE = 1 if the respondent has lived here > 50 years, otherwise LIVE = 0
social		SOCIAL = 1 if the respondent has joined community group, otherwise SOCIAL = 0
land		LAND = 1 if the respondent has owned the farmland, otherwise LAND = 0
farmer	Occupation	FARMER = 0 if the respondent is farmer, otherwise FARMER = 1
indigen		INDIGEN = 1 if this respondent is indigenous resident, otherwise INDIGEN = 0
